# Supplementary material for: Mechanistic study of homoleptic trisamidolanthanide-catalyzed aldehyde and ketone hydroboration. Chemically non-innocent ligand participation
Source: Royal Society of Chemistry journal article supplement (doi:10.1039/d2sc06442a), 2023-01-01
Supplement: d2sc06442a1.pdf [file d2sc06442a1.pdf]

## Mechanistic Study of Homoleptic Trisamidolanthanide-Catalyzed Aldehyde and Ketone Hydroboration. Chemically Non-Innocent Ligand Participation

Jacob O. Rothbaum,<sup>a</sup> Alessandro Motta,<sup>b\*</sup> Yosi Kratish,<sup>a\*</sup> and Tobin J. Marks<sup>a\*</sup>

<sup>a</sup>*Department of Chemistry, Northwestern University, Evanston, Illinois 60208-3113, United States*

<sup>b</sup>*Dipartimento di Scienze Chimiche, Università di Roma “La Sapienza” and INSTM, Udr Roma, Piazzale Aldo Moro 5, I-00185 Roma, Italy*

### Table of Contents

|                                                                          |      |
|--------------------------------------------------------------------------|------|
| 1. Experimental.....                                                     | S2   |
| 1.1. Materials and Methods .....                                         | S2   |
| 1.2. Physical and Analytical Measurements .....                          | S3   |
| 1.3. Synthesis and Characterization of Complex <b>1</b> .....            | S4   |
| 1.4. Synthesis and Characterization of Complex <b>4</b> .....            | S9   |
| 1.5. Synthesis and Characterization of Complex <b>8</b> .....            | S14  |
| 1.6. Stoichiometric Addition of HBpin to La <sup>NTMS</sup> .....        | S20  |
| 1.7. Stoichiometric Studies with Complex <b>1</b> and HBpin.....         | S24  |
| 1.8. Stoichiometric Studies with Complex <b>4</b> and HBpin.....         | S30  |
| 1.9. Stoichiometric Studies with Complex <b>8</b> and Benzophenone.....  | S36  |
| 1.10. Stoichiometric Studies with Complex <b>8</b> and Benzaldehyde..... | S42  |
| 1.11. Procedure for NMR-Scale Catalytic Reaction.....                    | S48  |
| 1.12. X-Ray Data Collection, Structure Solution, and Refinement.....     | S51  |
| 2. Computational Details .....                                           | S57  |
| 2.1 DFT Examination of. Catalyst Decomposition Pathway .....             | S58  |
| 2.2 Cartesian Coordinates .....                                          | S59  |
| 3. References.....                                                       | S116 |

## 1. Experimental

### 1.1. Materials and Methods

Due to the air- and moisture sensitivity of the lanthanide-organic complexes used in this study, all manipulations of air-sensitive materials for this mechanistically-oriented study were carried out with rigorous exclusion of O<sub>2</sub> and moisture in flame- or oven-dried Schlenk-type glassware on either a dual-manifold Schlenk line, interfaced to a high- vacuum manifold (10<sup>-6</sup> Torr), or in a N<sub>2</sub>-filled mBraun glovebox with a high-capacity recirculator (<1 ppm O<sub>2</sub>). Argon (Airgas) was purified by passage through a MnO column to remove O<sub>2</sub> and a column of Davison 4A molecular sieves to remove water, immediately before use. Toluene-*d*<sub>8</sub> (Cambridge Isotope Laboratories, 99+ atom % D) for NMR reactions and kinetic measurements was stored over Na/K alloy *in vacuo* and vacuum or filter transferred before use. La[N(SiMe<sub>3</sub>)<sub>2</sub>]<sub>3</sub> (La<sup>NTMS</sup>) was purchased from Sigma-Aldrich or Strem and stored under inert atmosphere in a glovebox. Liquid substrates and substrate solutions were degassed by freeze-pump-thaw methods, dried over CaH<sub>2</sub> overnight, and distilled before use. Solid substrates were purified by sublimation under high vacuum and were stored in a glovebox. Pinacolborane (HBpin) was purchased from TCI America, distilled, and stored at -35 °C in a glovebox. The hexamethylbenzene and mesitylene internal integration standard for kinetic NMR studies was purchased from Strem and Sigma-Aldrich, sublimed under high- vacuum or dried over CaH<sub>2</sub>, and stored in the glove box. All glassware used was oven-dried overnight. Elemental analysis was performed by Midwest Microlab.

## 1.2. Physical and Analytical Measurements

NMR spectra were recorded on Bruker Avance III HD (BBFO Smart Probe, FT, 400 MHz,  $^1\text{H}$ ; 400 MHz,  $^{13}\text{C}$ ; 101 MHz,  $^{11}\text{B}$ ; 128 MHz), Bruker Avance III 600 (BBFO Smart Probe, 600 MHz,  $^1\text{H}$ ; 600,  $^{13}\text{C}$ ; 151,  $^{11}\text{B}$ ; 193 MHz), Bruker Avance III HD (TXO 5mm Prodigy Probe, 500MHz,  $^1\text{H}$ ; 1200,  $^{13}\text{C}$ ; 700) and Bruker Avance III (CryoProbe 5mm DCH, 500 MHz,  $^1\text{H}$ ; 1800;  $^{13}\text{C}$ ; 1400) instruments. Chemical shifts for  $^1\text{H}$  and  $^{13}\text{C}$  spectra were referenced using internal solvent resonances and are reported relative to tetramethylsilane (TMS). NMR experiments on air-sensitive samples were conducted in Teflon-valve-sealed sample tubes (J. Young).

### 1.3. Synthesis and Characterization of Complex 1

Synthesis of **1**: In a glovebox, La<sup>NTMS</sup> (0.2 g, 0.323 mmol) was weighed into a 4 mL vial, 1 mL of anhydrous toluene was added, thoroughly mixed, and transferred to a flame-dried J-Young flask. Benzophenone (58.8 mg, 0.323 mmol) was weighed out and added to the solution. The resulting mixture was allowed to react for 1 h at room temperature and then concentrated, washed with cold toluene, and dried to afford a light-yellow powder. Single crystals suitable for X-ray crystallography were obtained from the concentrated solution. Isolated yield: 197 mg (76%).

(**1**) <sup>1</sup>H NMR (500 MHz, Toluene-*d*<sub>8</sub>) δ 7.69 (d, *J* = 7.0 Hz, 4H, *o*-Ph), 7.14 – 7.11 (m, 2H, *p*-Ph), 7.07 – 7.04 (m, 4H, *m*-Ph), 0.33 (s, 58H, TMS) ppm. <sup>13</sup>C NMR (126 MHz, Toluene-*d*<sub>8</sub>) δ 200.72, 137.09, 133.80, 131.36, 128.56, 4.43 ppm. Anal. Calcd. for C<sub>31</sub>H<sub>64</sub>LaN<sub>3</sub>OSi<sub>6</sub>: C, 46.41; H, 8.04; N, 5.24. Found: C, 45.61; H, 7.54; N, 5.16. The low percentage values and found CH ratio are consistent with incomplete combustion, although a combustion aid was utilized. This is common with rare-earth complexes.<sup>1,2</sup>

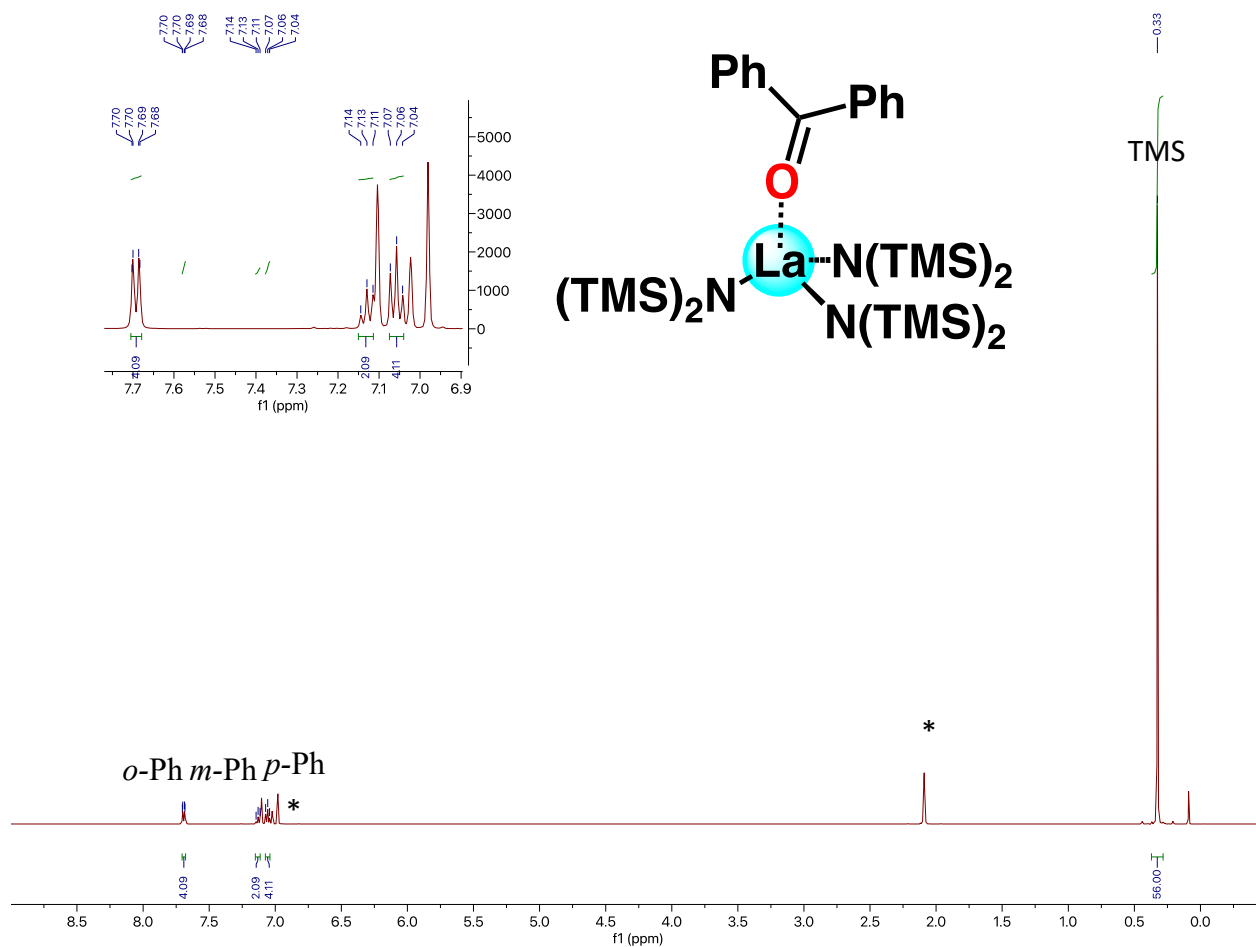

**Figure S1.**  $^1\text{H}$  NMR spectrum of **1** in  $\text{toluene-}d_8$ . *o*-Ph = *ortho* phenyl protons, *p*-Ph = *para* phenyl protons, *m*-Ph = *meta* phenyl protons, TMS = trimethylsilyl, \* =  $\text{toluene-}d_8$ . Close-up panel of the aromatic peaks.

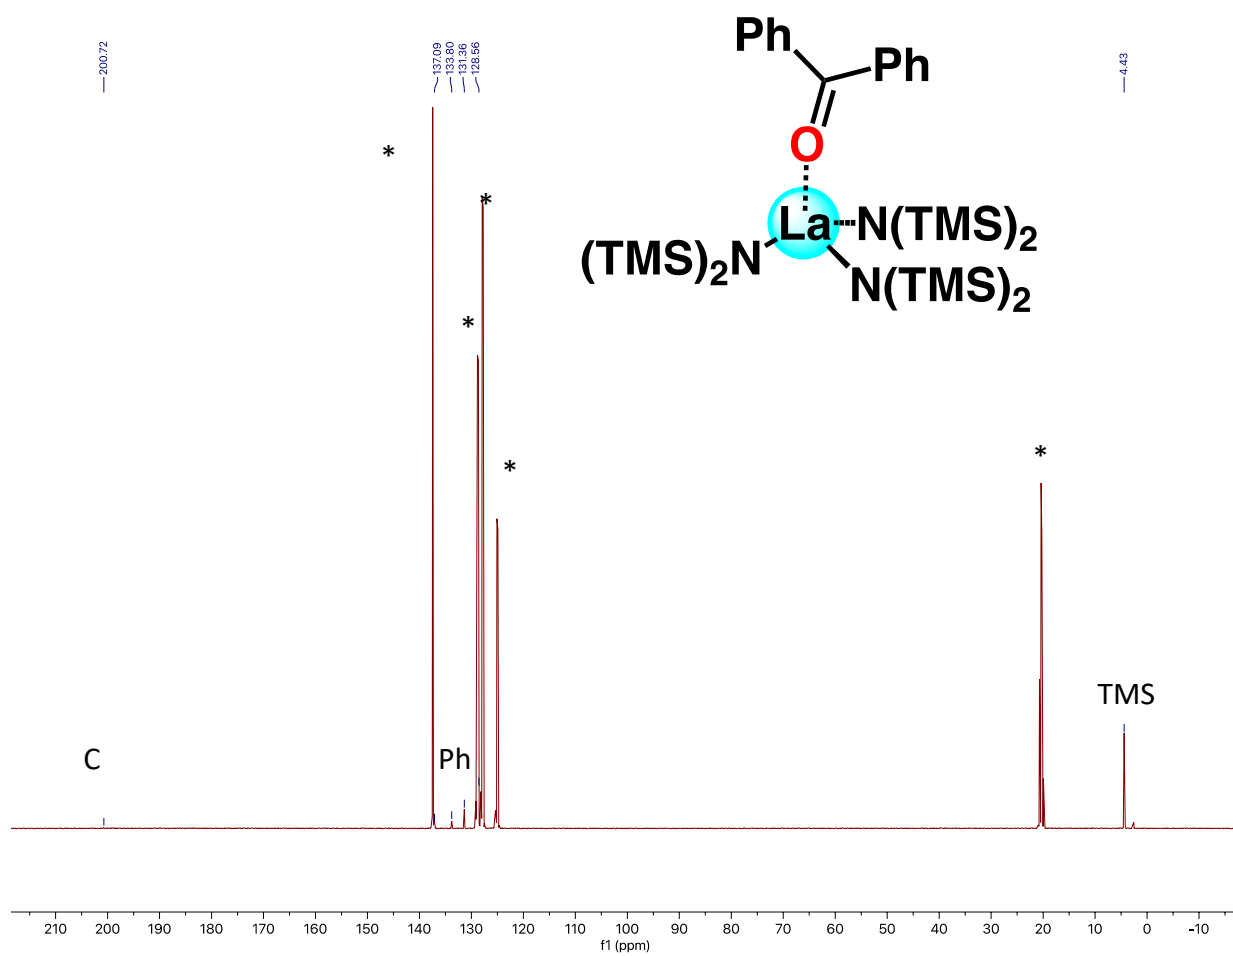

**Figure S2.**  $^{13}\text{C}$  NMR spectrum of **1** in toluene- $d_8$ . C = carbonyl carbon, Ph = phenyl carbons, TMS = trimethylsilyl, \* = toluene- $d_8$ .

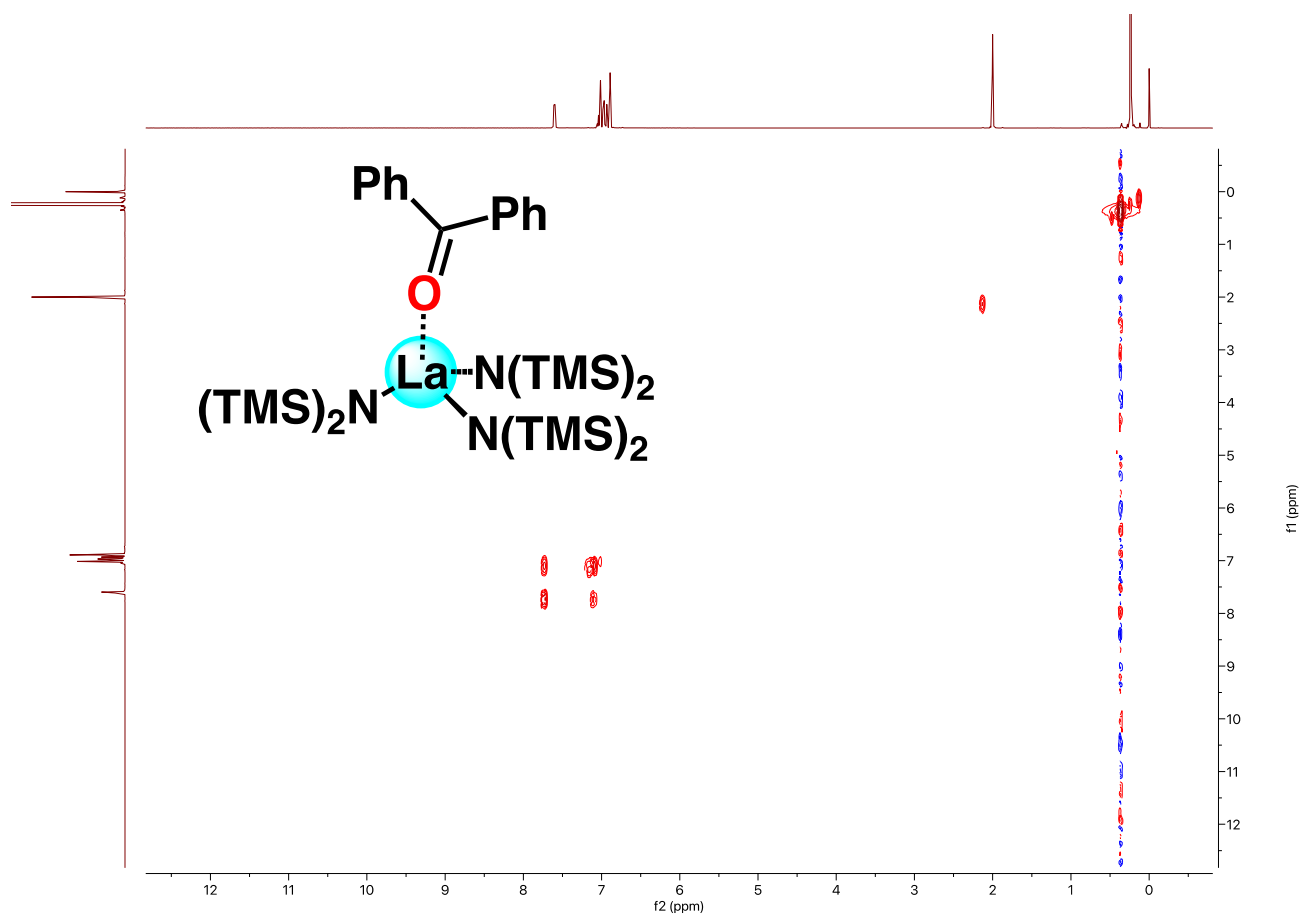

**Figure S3.**  $^1\text{H}$  –  $^1\text{H}$  COSY NMR spectrum of **1** in  $\text{toluene-}d_8$ .

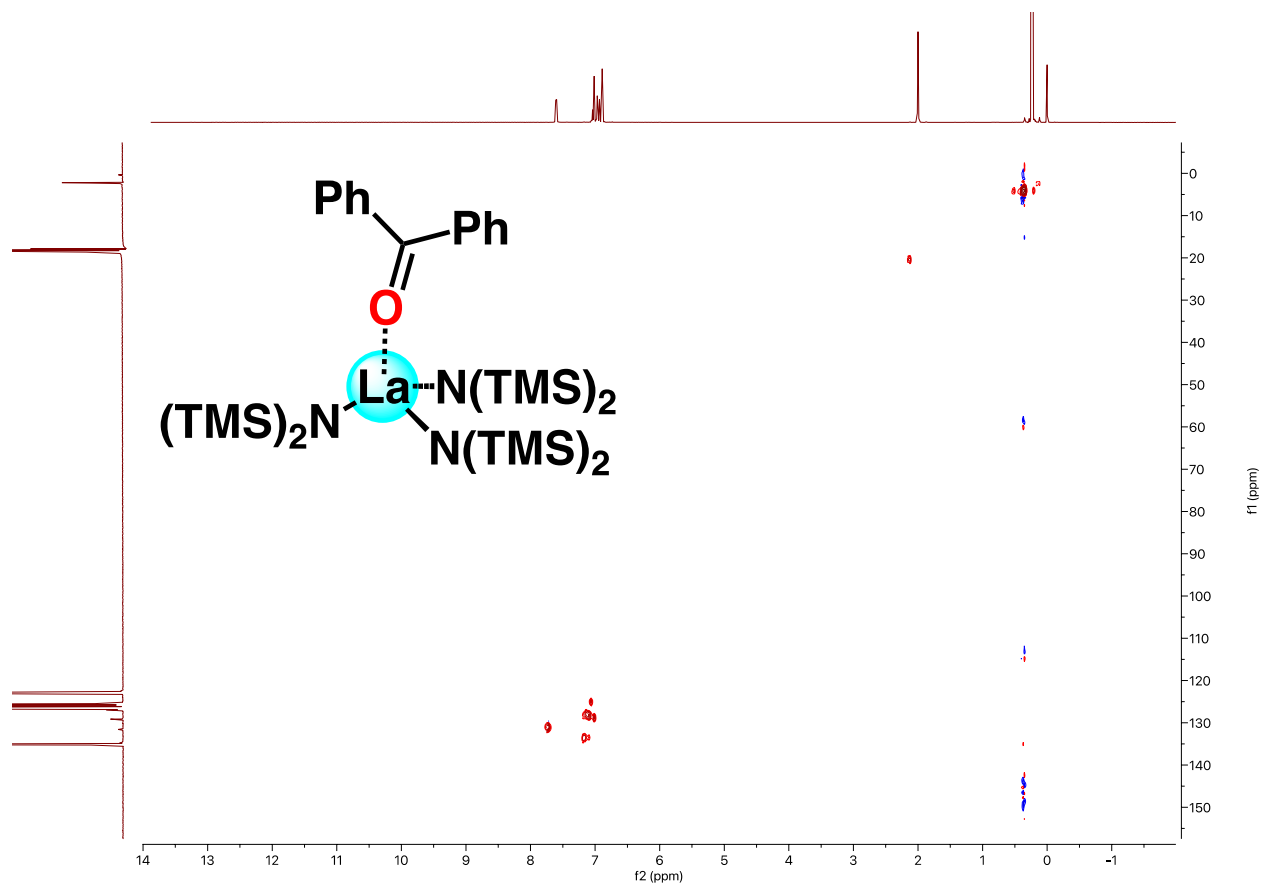

**Figure S4.**  $^1\text{H} - ^{13}\text{C}$  HSQC NMR spectrum of **1** in toluene- $d_8$ .



#### 1.4. Synthesis and Characterization of Complex 4

Synthesis of **4**: In a glovebox, La<sup>N</sup>TMS (0.2 g, 0.323 mmol) was weighed into a 4 mL vial, 1 mL of anhydrous toluene was added, thoroughly mixed, and transferred to a flame-dried J-Young flask. Benzaldehyde (32.8  $\mu$ g, 0.323 mmol) was syringed into the solution. The resulting mixture was allowed to react for 1 h at room temperature and then concentrated, washed with cold toluene, and dried to afford a white powder. Single crystals suitable for X-ray crystallography were obtained from a concentrated solution of toluene at room temperature. Isolated yield: 117 mg (56%).

(**4**) <sup>1</sup>H NMR (500 MHz, Toluene-*d*<sub>8</sub>)  $\delta$  7.63 – 7.61 (m, 2H, *o*-Ph), 7.57 – 7.47 (m, 2H, *o*-Ph), 7.30 – 7.21 (m, 2H, *p*-Ph), 7.09 – 7.04 (m, 4H, *m*-Ph), 0.27 (s, 18H, TMS), 0.26 (s, 72H, N\*) ppm. <sup>13</sup>C NMR (126 MHz, Toluene-*d*<sub>8</sub>)  $\delta$  157.65, 140.89, 130.10, 126.60, 125.60 ppm. Anal. Calcd. for C<sub>44</sub>H<sub>100</sub>La<sub>2</sub>N<sub>6</sub>O<sub>2</sub>Si<sub>10</sub> · 0.25 equiv. Toluene: C, 41.41; H, 7.75; N, 6.33. Found: C, 41.76; H, 7.73; N, 6.26.

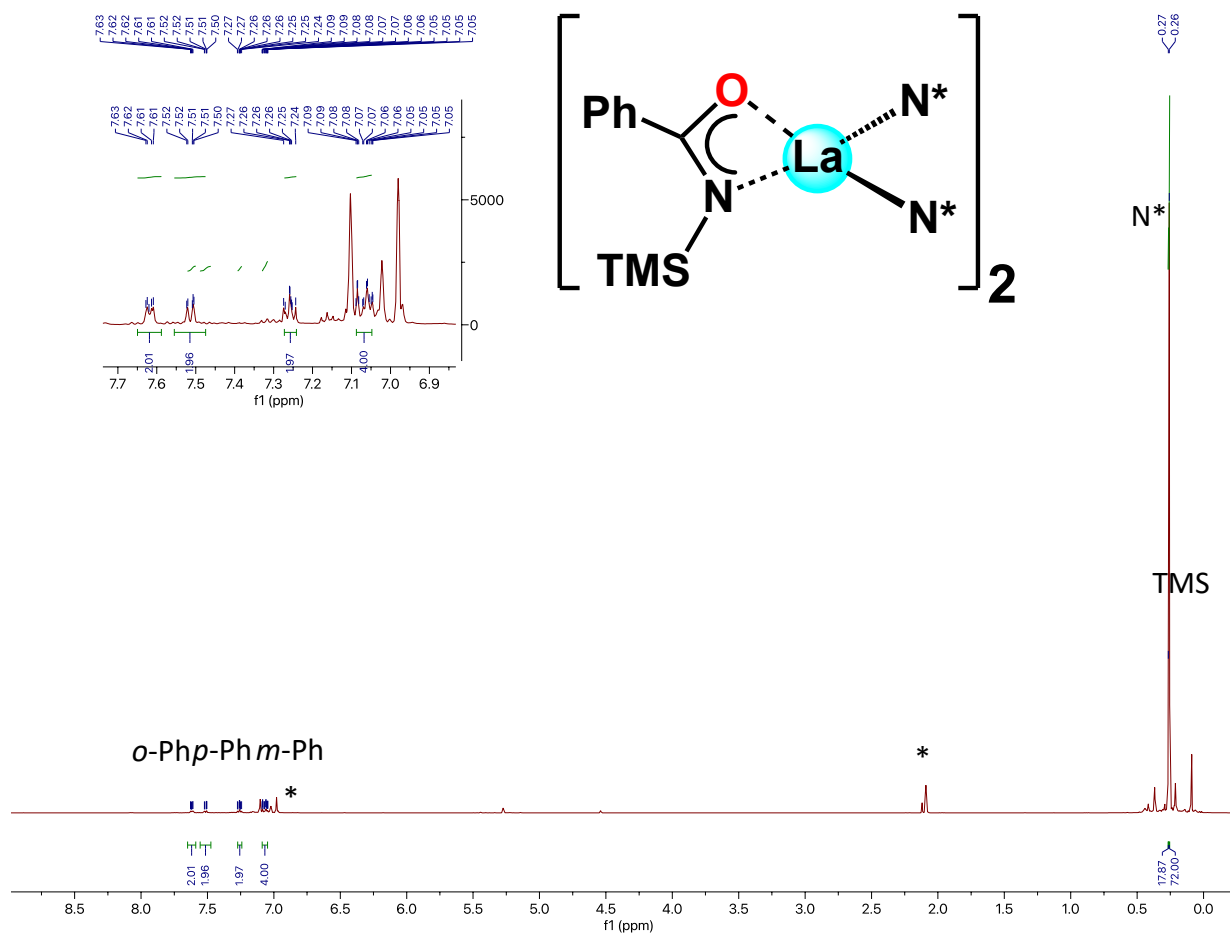

**Figure S5.**  $^1\text{H}$  NMR spectrum of **4** in  $\text{toluene-}d_8$ . *o*-Ph = *ortho* phenyl protons, *p*-Ph = *para* phenyl protons, *m*-Ph = *meta* phenyl protons, TMS = trimethylsilyl,  $\text{N}^* = \text{N}(\text{TMS})_2$ , \* =  $\text{toluene-}d_8$ . Close-up panel of the aromatic peaks.

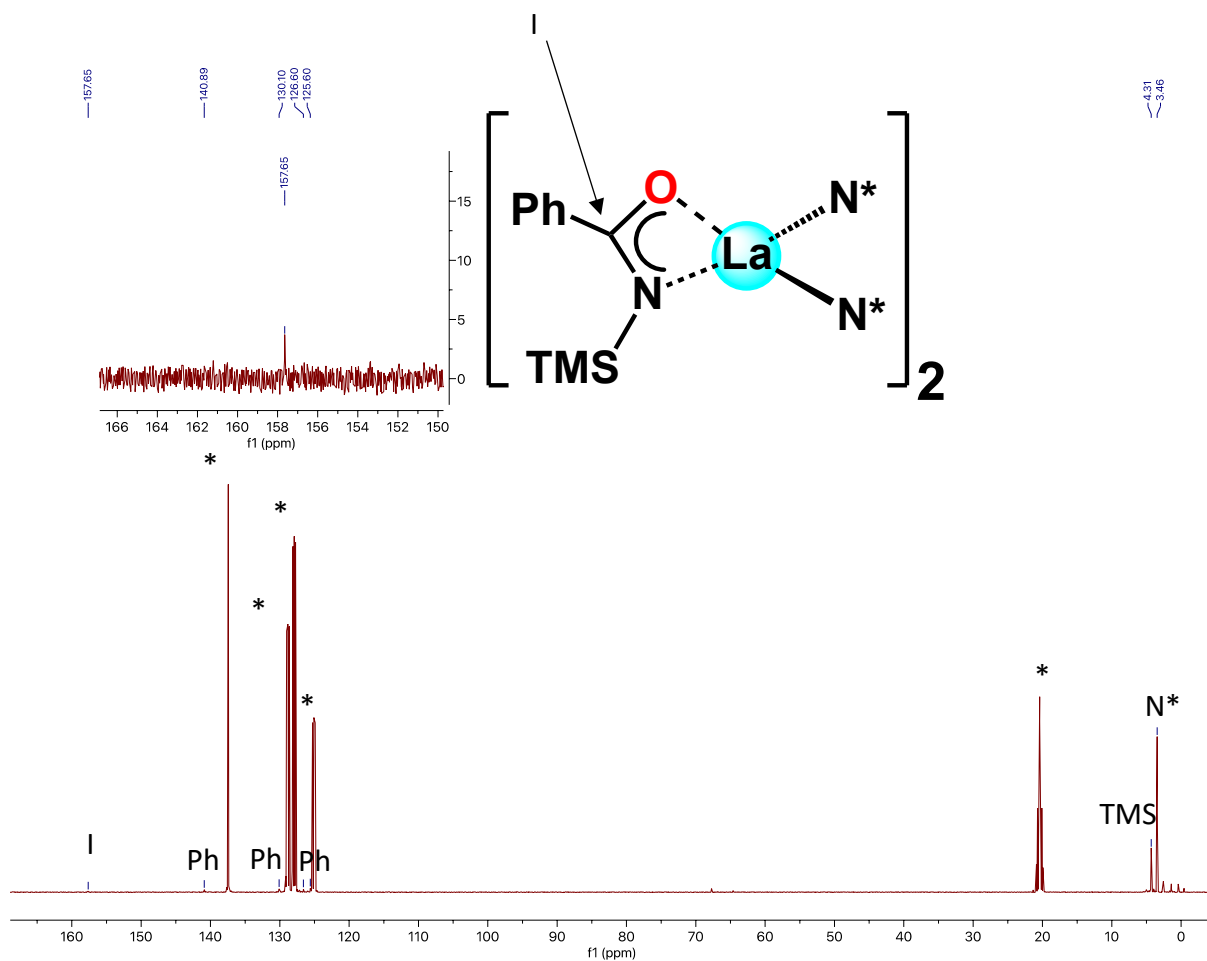

**Figure S6.**  $^{13}\text{C}$  NMR spectrum of **4** in  $\text{toluene-}d_8$ . I = imino carbon, Ph = phenyl carbons, TMS = trimethylsilyl,  $\text{N}^* = \text{N}(\text{TMS})_2$ , \* =  $\text{toluene-}d_8$ . Close-up panel of the imino peak.

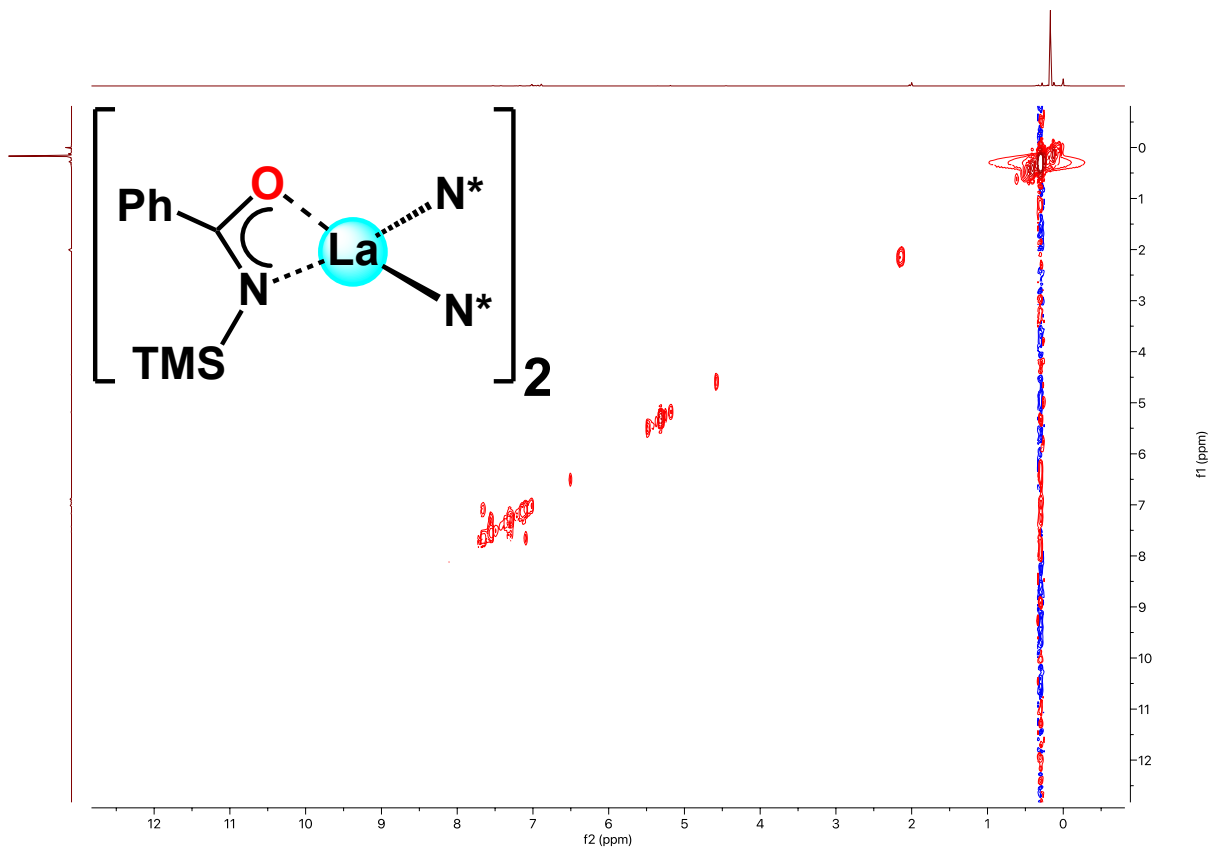

**Figure S7.**  $^1\text{H} - ^1\text{H}$  COSY NMR spectrum of **4** in toluene- $d_8$ .

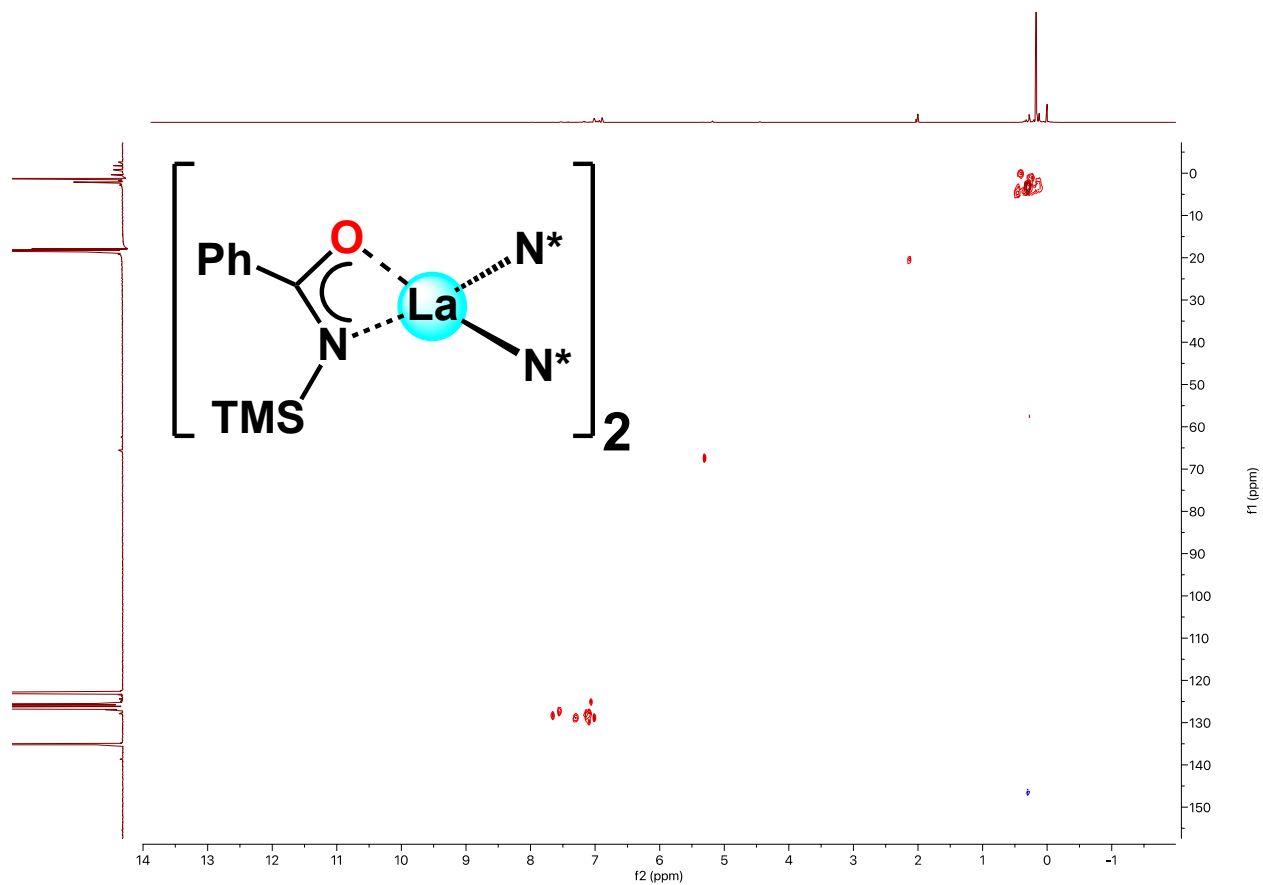

**Figure S8.**  $^1H - ^{13}C$  HSQC NMR spectrum of **4** in toluene- $d_8$ .

### 1.5. Synthesis and Characterization of Complex 8

Synthesis of **8**: In a glovebox, La<sup>N<sup>TMS</sup></sup> (0.2 g, 0.323 mmol) was weighed into a 4 mL vial, 1 mL of anhydrous toluene was added, thoroughly mixed, and transferred to a flame-dried J-Young flask. HBpin (140.4  $\mu$ g, 0.968 mmol) was syringed into the solution. The resulting mixture was allowed to react for 1 h and then concentrated, washed with cold toluene, and dried to afford a white powder. Single crystals suitable for X-ray crystallography were obtained from the concentrated solution. Isolated yield: 220 mg (47%).

**(8)** <sup>1</sup>H NMR (500 MHz, Toluene-*d*<sub>8</sub>)  $\delta$  1.57 (br, 12 H, (BH<sub>3</sub>)<sub>4</sub>), 1.02 (s, 48H, Me), 0.33 (s, 72, TMS) ppm. <sup>13</sup>C NMR (126 MHz, Toluene-*d*<sub>8</sub>)  $\delta$  81.60, 24.56, 3.72 ppm. <sup>11</sup>B NMR (128 MHz, Toluene-*d*<sub>8</sub>)  $\delta$  25.74, -5.94 ppm. Anal. Calcd. for C<sub>48</sub>H<sub>132</sub>LaN<sub>4</sub>O<sub>8</sub>Si<sub>8</sub>: C, 39.46; H, 3.84; N, 9.11. Found: C, 39.40; H, 3.75; N, 8.82.

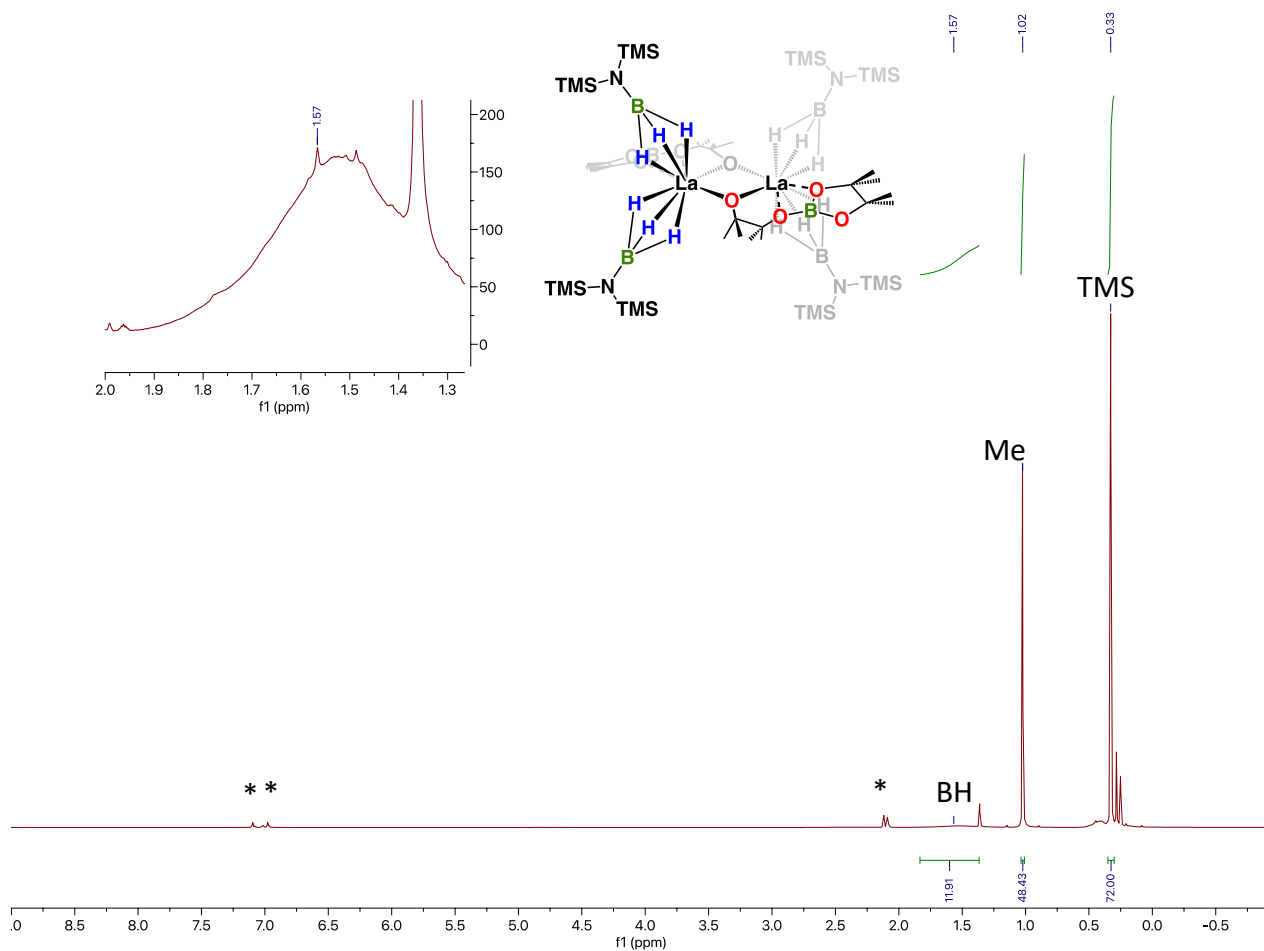

**Figure S9.**  $^1\text{H}$  NMR spectrum of **8** in  $\text{toluene-}d_8$ . BH = borohydrides, Me = methyls from pinacol, TMS = trimethylsilyl, \* =  $\text{toluene-}d_8$ .

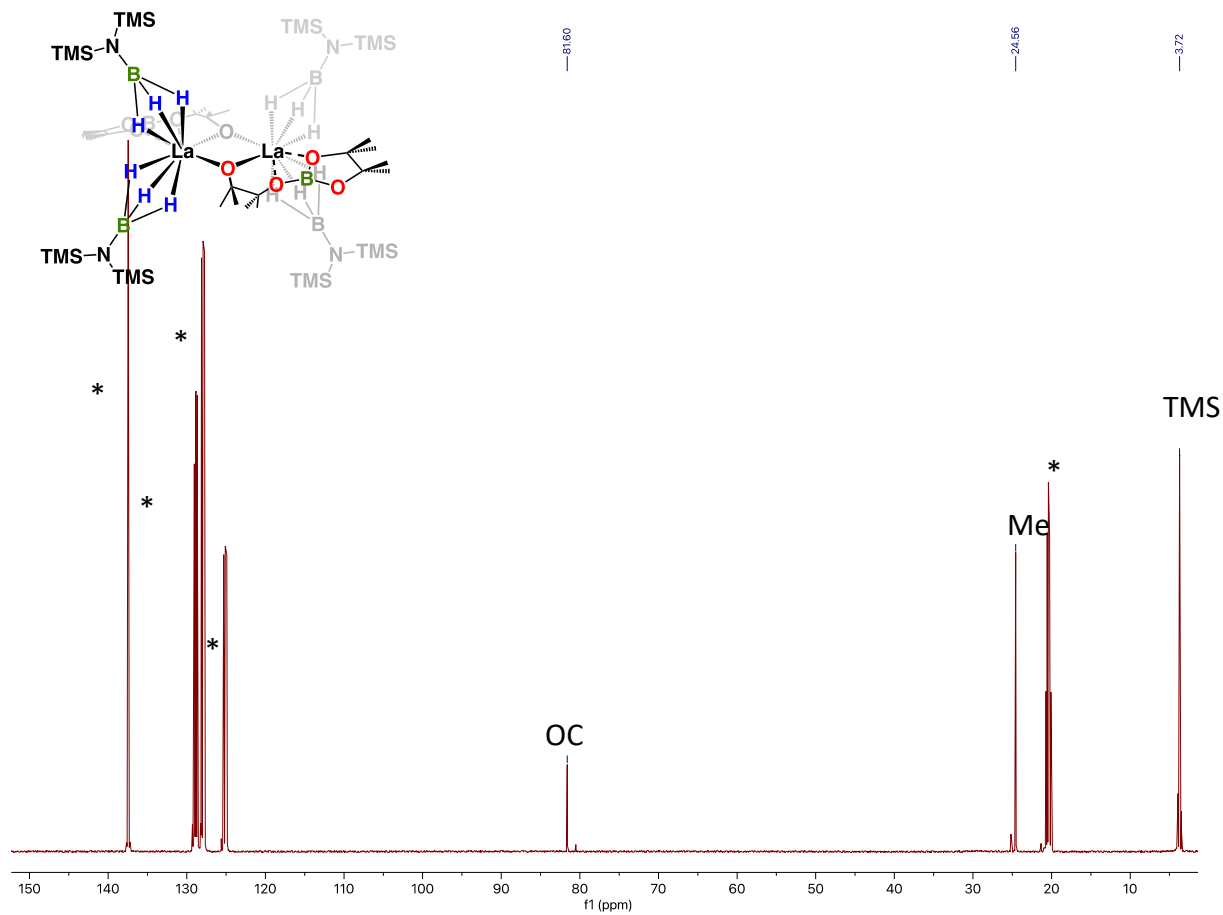

**Figure S10.**  $^{13}\text{C}$  NMR spectrum of **8** in  $\text{toluene-}d_8$ . OC = methoxy carbons, Me = methyl carbons from pinacol, TMS = trimethylsilyl, \* =  $\text{toluene-}d_8$ .



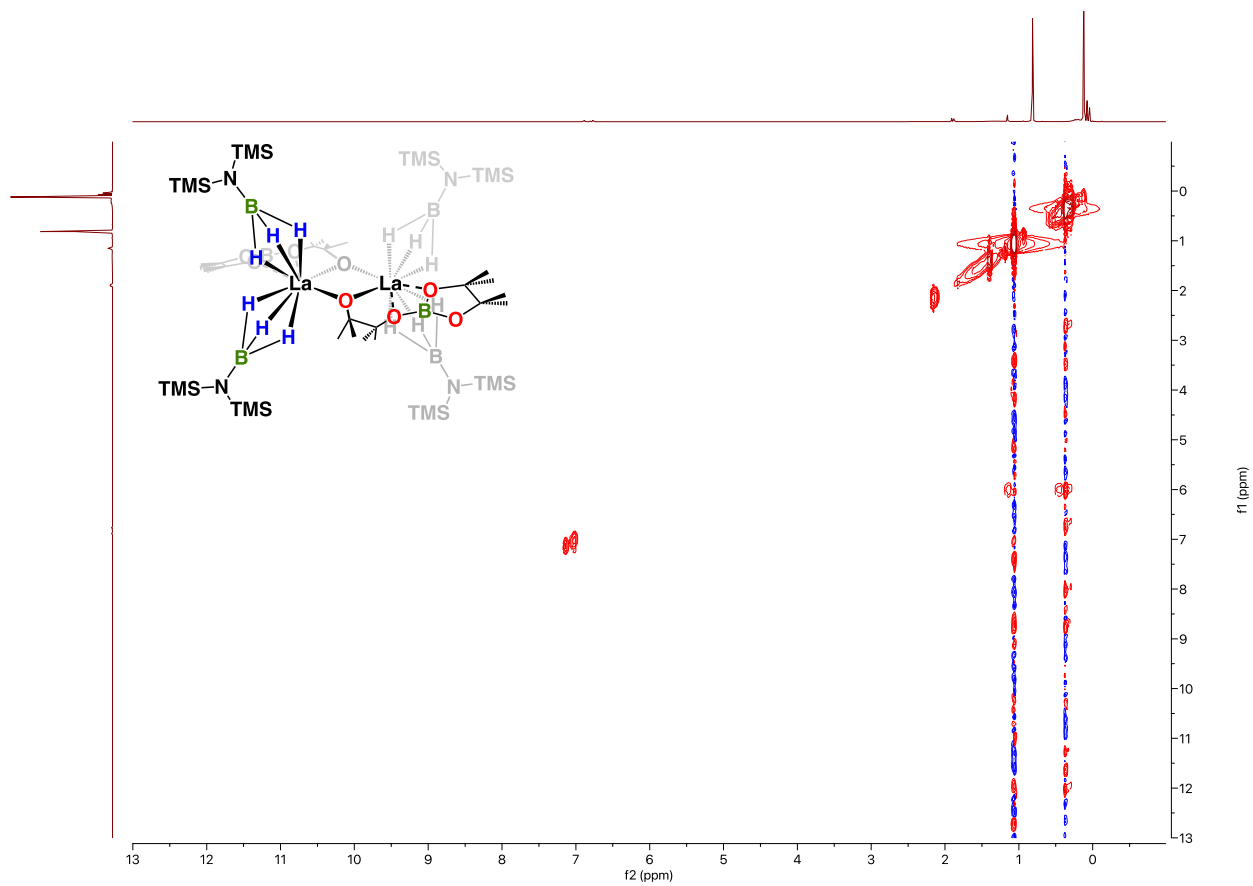

**Figure S11.**  $^1\text{H} - ^1\text{H}$  COSY NMR spectrum of **8** in toluene- $d_8$ .

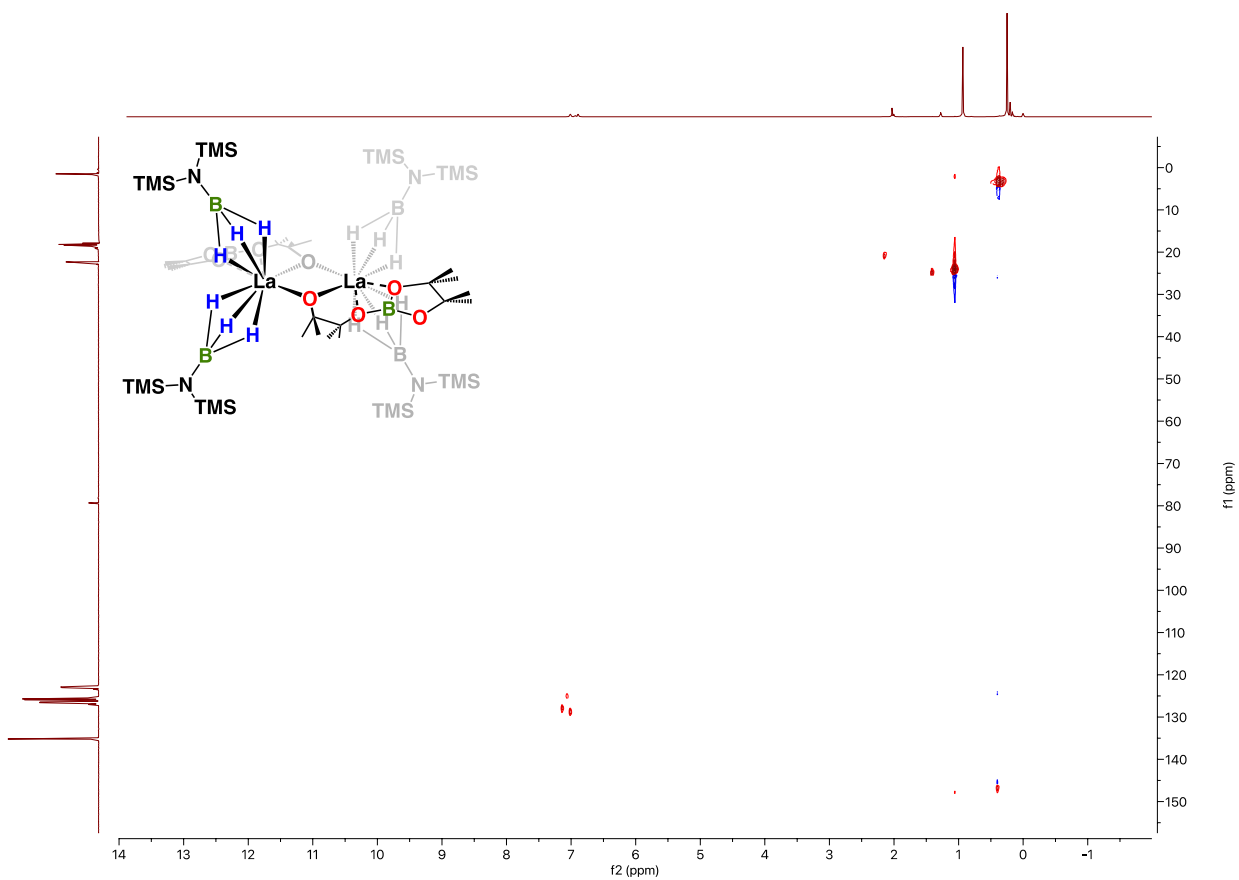

**Figure S12.**  $^1\text{H}$  –  $^{13}\text{C}$  HSQC NMR spectrum of **8** in  $\text{toluene-}d_8$ .

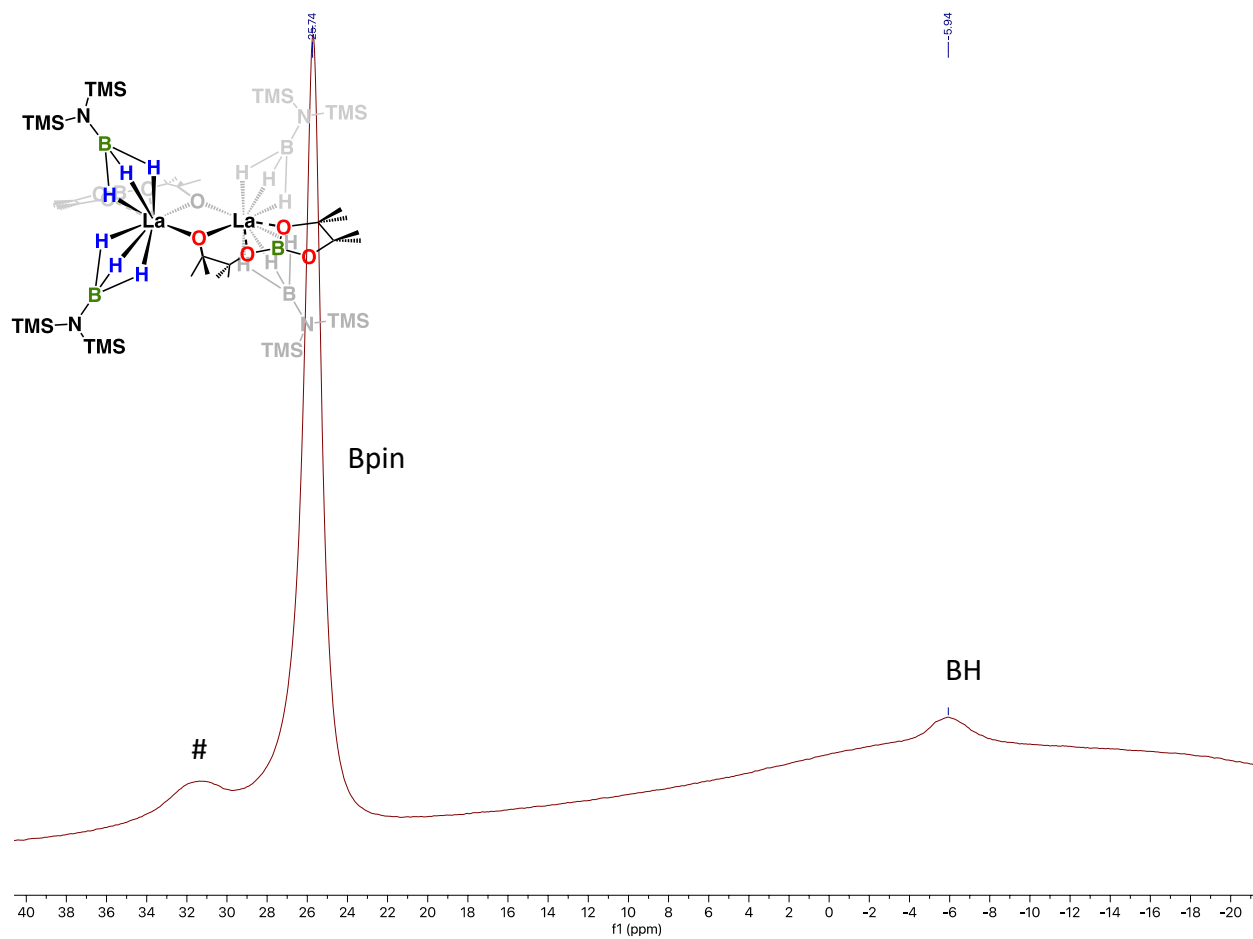

**Figure S13.**  $^{11}\text{B}$  NMR spectrum of **8** in  $\text{toluene-}d_8$ . Bpin = boron pinacol, BH = borohydride, # = unidentified side product. Refer to Figure S16 to more clearly observe the quartet at -5.94 ppm.

### 1.6. Stoichiometric addition of HBpin to La<sup>NTMS</sup>

In a glovebox, La<sup>NTMS</sup> (25 mg, 0.04 mmol) was weighed into a 4 mL vial, 500  $\mu$ L of toluene-*d*<sub>8</sub> was added, thoroughly mixed, and transferred to a J-Young NMR tube. HBpin (5.85  $\mu$ L, 0.04 mmol) and mesitylene (5  $\mu$ L) as the internal standard were syringed into the NMR tube and mixed with the solution. The sealed NMR tube was removed from the glove box and left at room temperature for the indicated reaction times (Scheme S1). After 1 h, an additional equivalent of HBpin was added to the solution and spectra were recorded. This was done for 4 h and the resulting mixtures were analyzed *in situ*.

**Scheme S1.** Stoichiometric addition of HBpin to La<sup>NTMS</sup>.

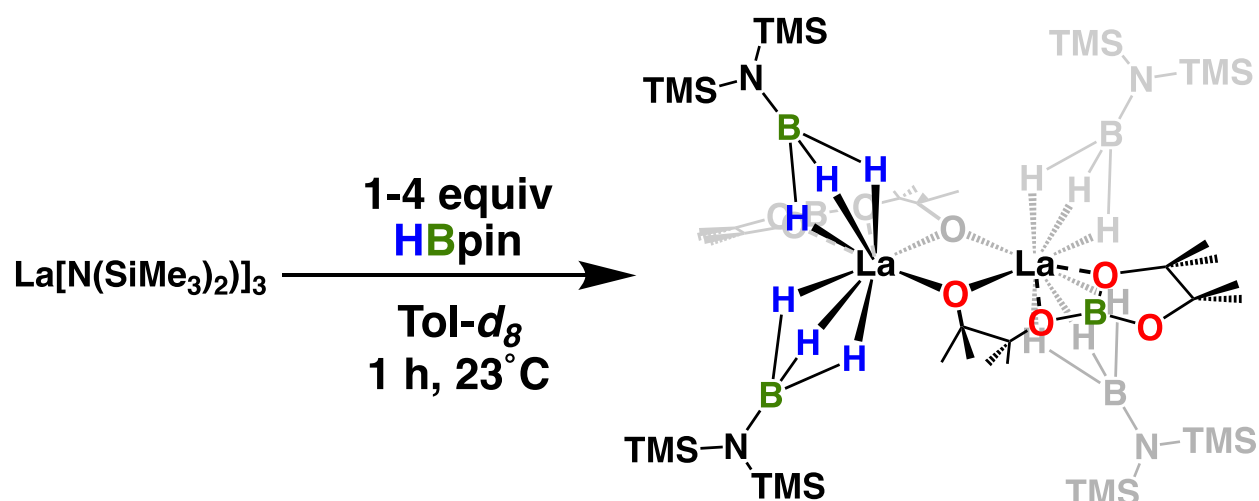

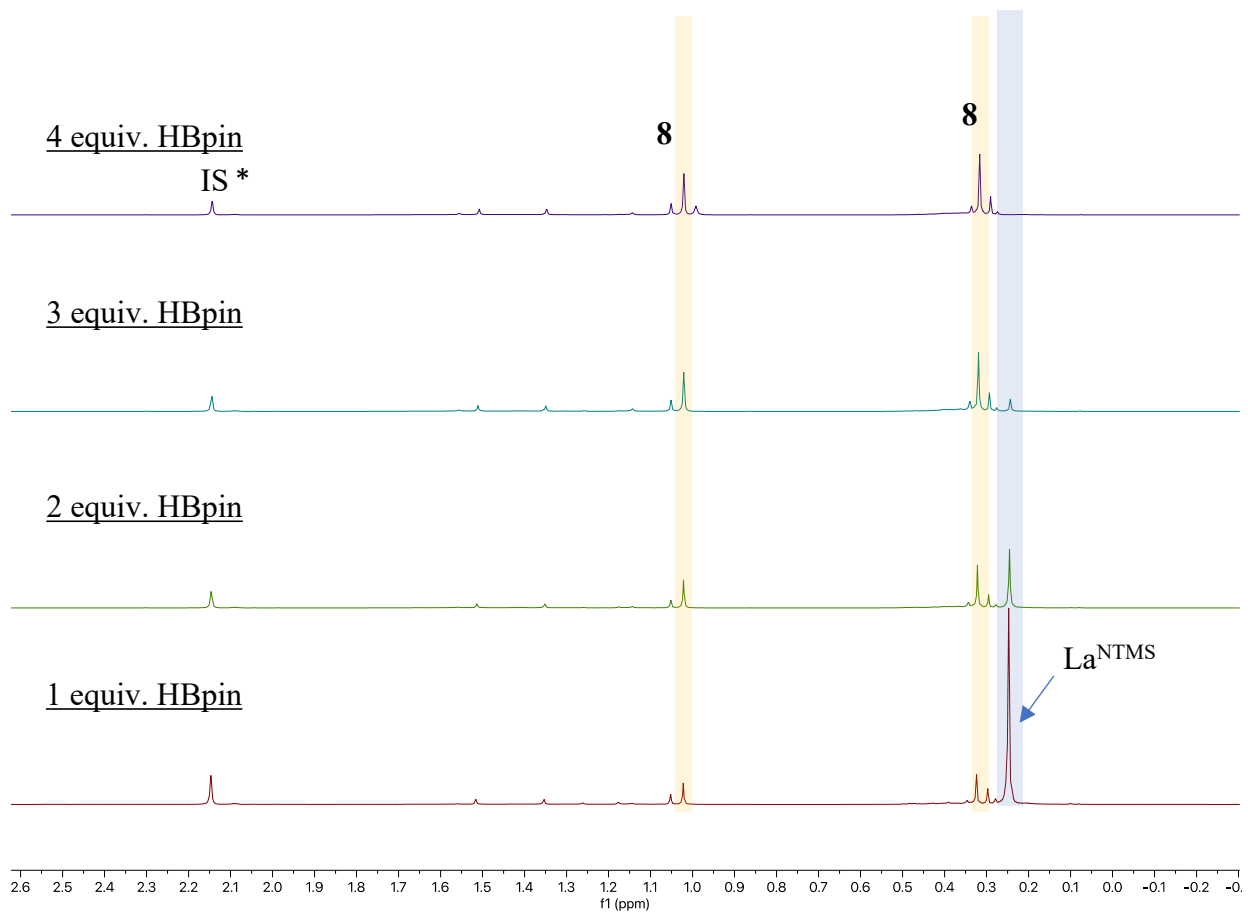

**Figure S14.** Close-up of stacked <sup>1</sup>H NMR spectra of the reaction from the addition of HBpin to La<sup>NTMS</sup> represented in Scheme S1 after 1 h for each equivalent of HBpin. La<sup>NTMS</sup> = La<sup>NTMS</sup> (highlighted in blue), IS = internal standard (mesitylene), **8** = Complex **8** (highlighted in yellow), \* = toluene-*d*<sub>8</sub>.

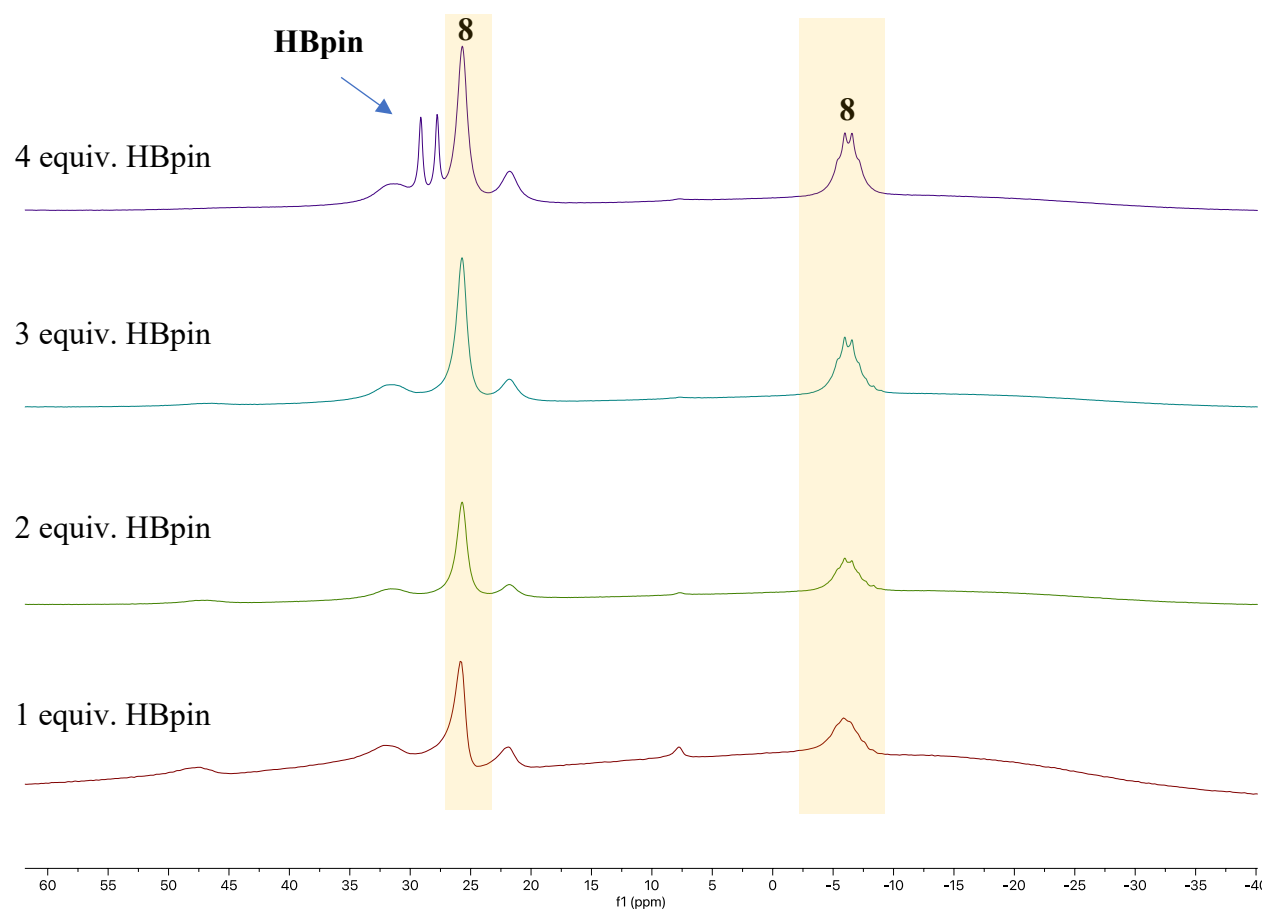

**Figure S15.** Stacked  $^{11}\text{B}$  NMR spectra of the reaction from the addition of HBpin to  $\text{La}^{\text{NTMS}}$  represented in Scheme S1 after 1 h for each equivalent of HBpin. 8 = Complex 8 (highlighted in yellow), HBpin = HBpin.

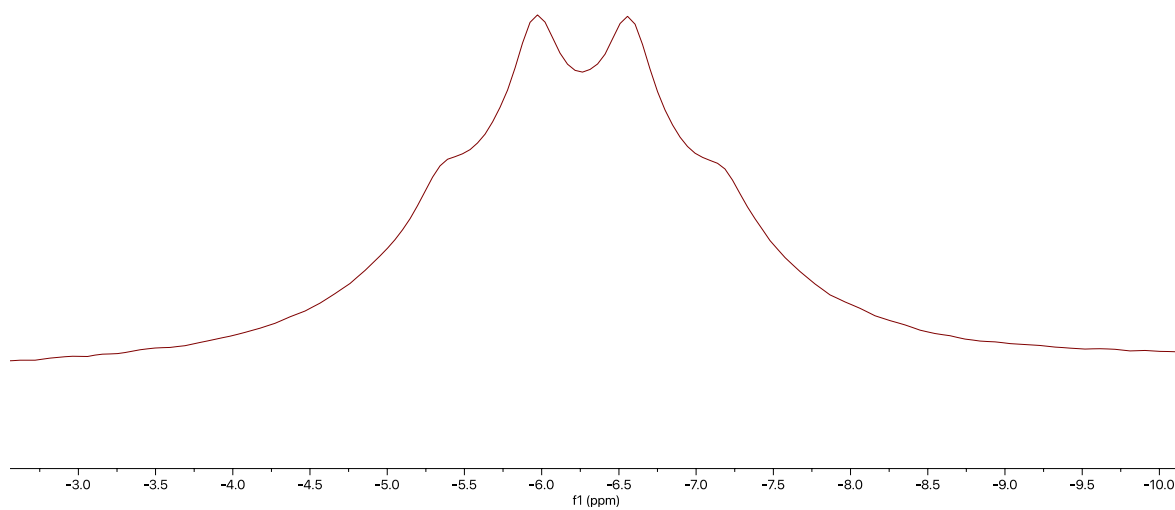

**Figure S16.** Close-up of the quartet in  $^{11}\text{B}$  NMR spectrum of the reaction from the addition of HBpin to  $\text{La}^{\text{NTMS}}$  represented in Scheme S1 after 4 h and 4 equivalents equivalent of HBpin revealing a quartet ( $I = 3/2$  for  $^{11}\text{B}$ ). This is the boron which is bound to three hydrides in complex **8**.

### 1.7. Stoichiometric Reaction Studies of Complex 1 with HBpin.

In a glovebox, complex 1 (40 mg, 0.05 mmol) was weighed into a 4 mL vial, 500  $\mu\text{L}$  of toluene- $d_8$  was added, thoroughly mixed, and transferred to a J-Young NMR tube. HBpin (7.23  $\mu\text{L}$ , 0.05 mmol) and mesitylene (5  $\mu\text{L}$ ) as the internal standard were syringed into the NMR tube and mixed with the solution. The sealed NMR tube was removed from the glove box and allowed to react at room temperature (Scheme S2). The TMS peaks are not reported due to the overlapped nature of the complex mixture.

(2)  $^1\text{H}$  NMR (500 MHz, Toluene- $d_8$ )  $\delta$  7.40 – 7.35 (m, 4H), 7.09 – 7.07 (m, 4H), 7.00 – 6.97 (m, 2H), 6.32 (s, 1H), 0.98 (s, 12H) ppm.  $^{13}\text{C}$  NMR (126 MHz, Toluene- $d_8$ )  $\delta$  143.88, 128.42, 127.31, 126.93, 82.69, 78.42, 24.49 ppm.  $^{11}\text{B}$  NMR (128 MHz, Toluene- $d_8$ )  $\delta$  22.88, -5.94 ppm.

(3)  $^1\text{H}$  NMR (500 MHz, Toluene- $d_8$ )  $\delta$  7.32 – 7.28 (m, 4H), 7.17 – 7.12 (m, 4H), 7.02 – 7.00 (m, 2H), 5.98 (s, 1H), 1.02 (s, 12H) ppm.  $^{13}\text{C}$  NMR (126 MHz, Toluene- $d_8$ )  $\delta$  144.00, 128.52, 127.41, 127.15, 83.91, 79.39, 24.49 ppm.  $^{11}\text{B}$  NMR (128 MHz, Toluene- $d_8$ )  $\delta$  25.74, -5.94 ppm.

**Scheme S2.** Stoichiometric reaction between complex 1 and HBpin as observed by NMR.

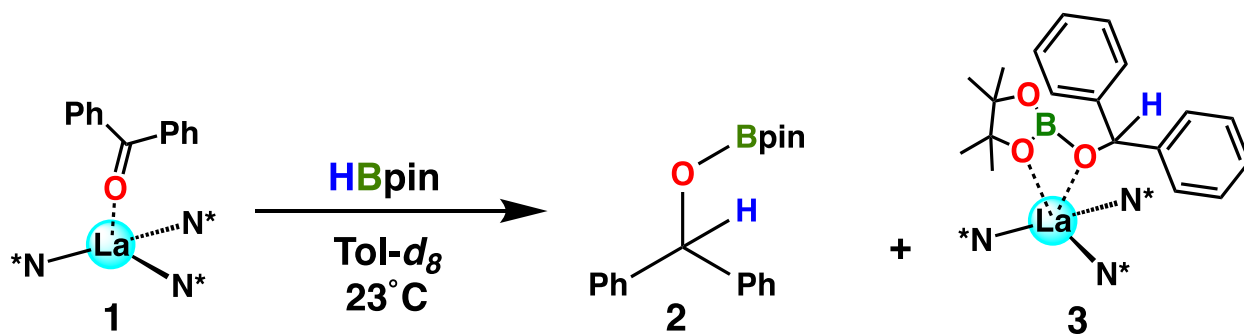



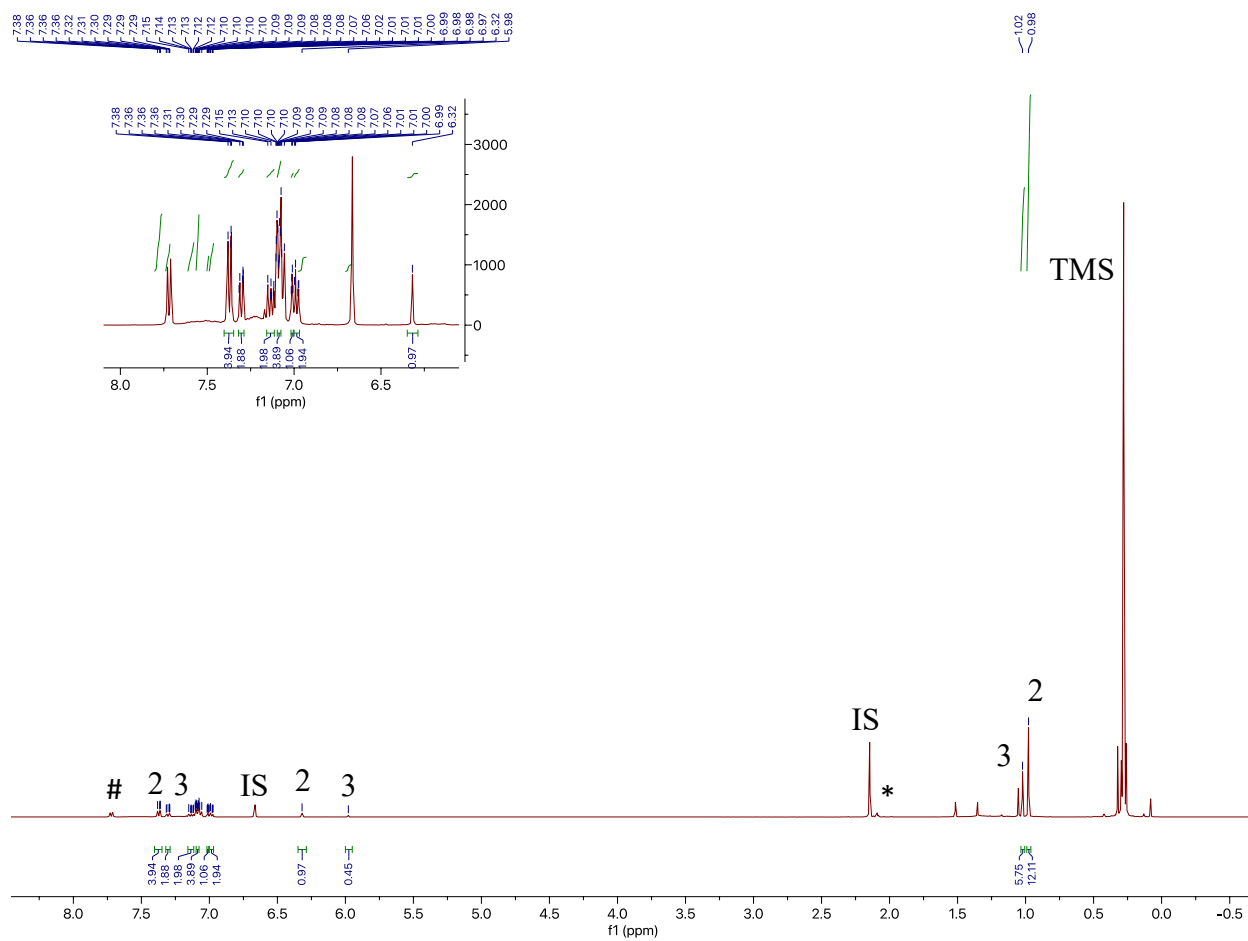

**Figure S17.** <sup>1</sup>H NMR spectrum of a **2** and **3** mixture in toluene-*d*<sub>8</sub>. **2** = Complex **2**, **3** = Complex **3**, \* = toluene-*d*<sub>8</sub>, TMS = SiMe<sub>3</sub>, IS = internal standard (mesitylene), # = unidentified side product.

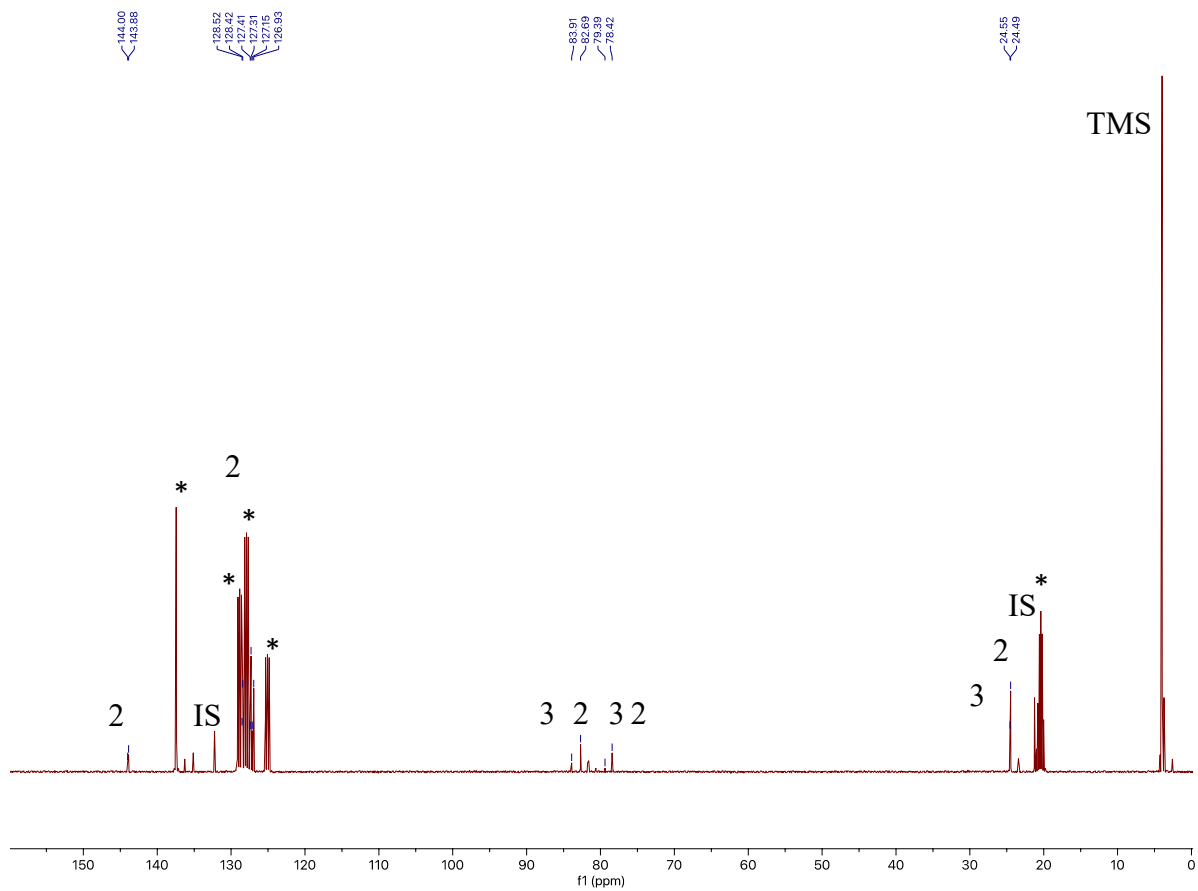

**Figure S18.**  $^{13}\text{C}$  NMR spectrum of **2** and **3** mixture in toluene- $d_8$ . **2** = Complex **2**, **3** = Complex **3**,

\* = toluene- $d_8$ , TMS =  $\text{SiMe}_3$ , IS = internal standard (mesitylene).

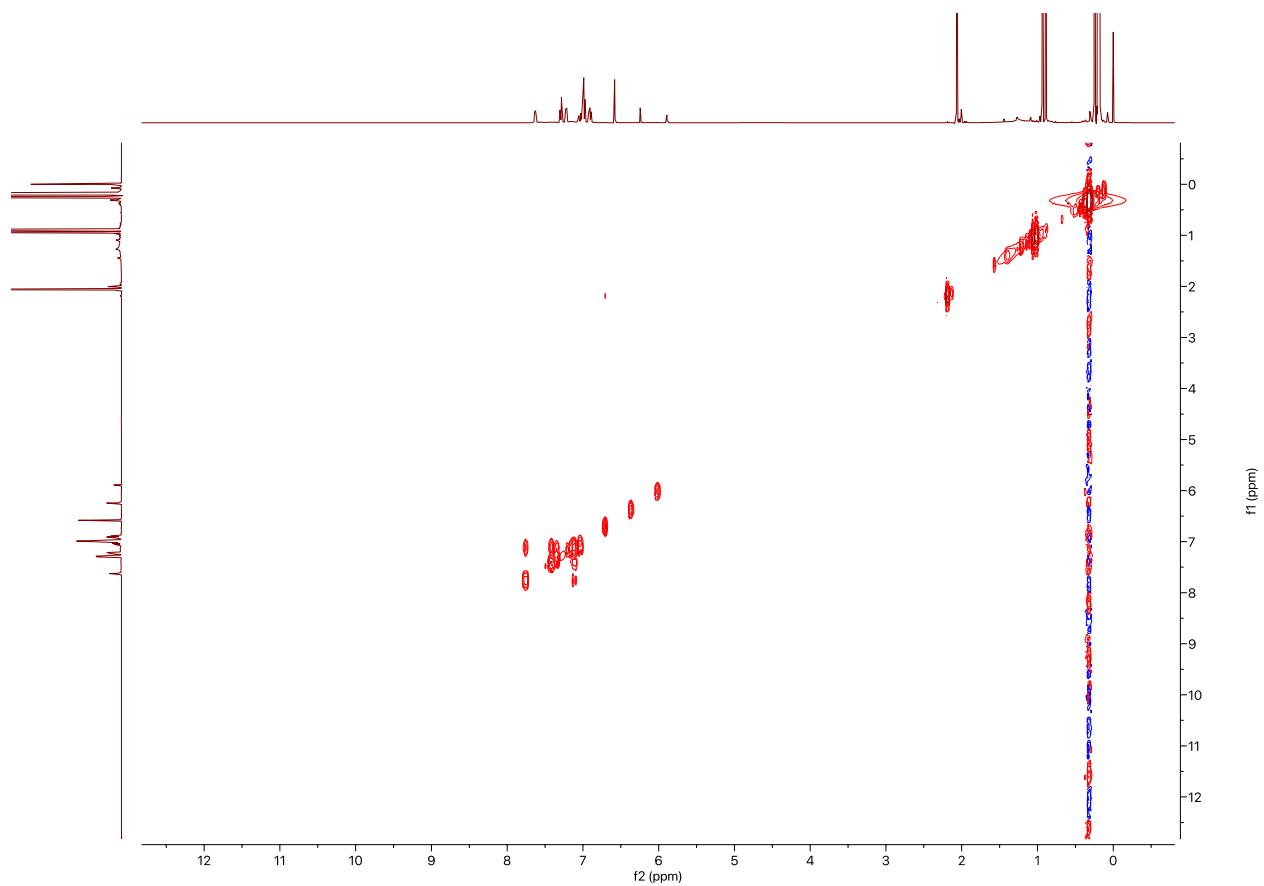

**Figure S19.**  $^1\text{H}$  –  $^1\text{H}$  COSY NMR spectrum of a **2** and **3** mixture in toluene- $d_8$ .

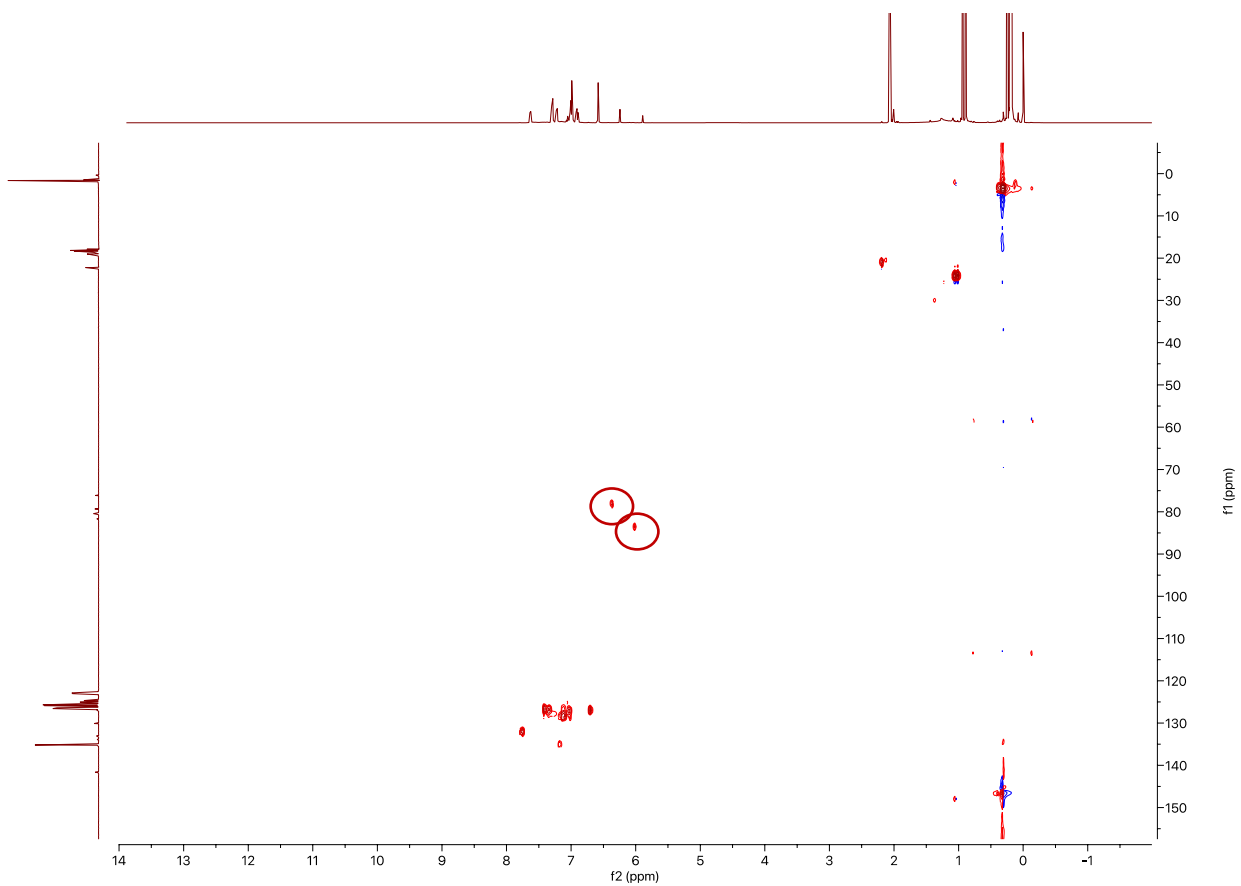

**Figure S20.**  $^1\text{H} - ^{13}\text{C}$  HSQC NMR spectrum of a **2** and **3** mixture in toluene- $d_8$ .

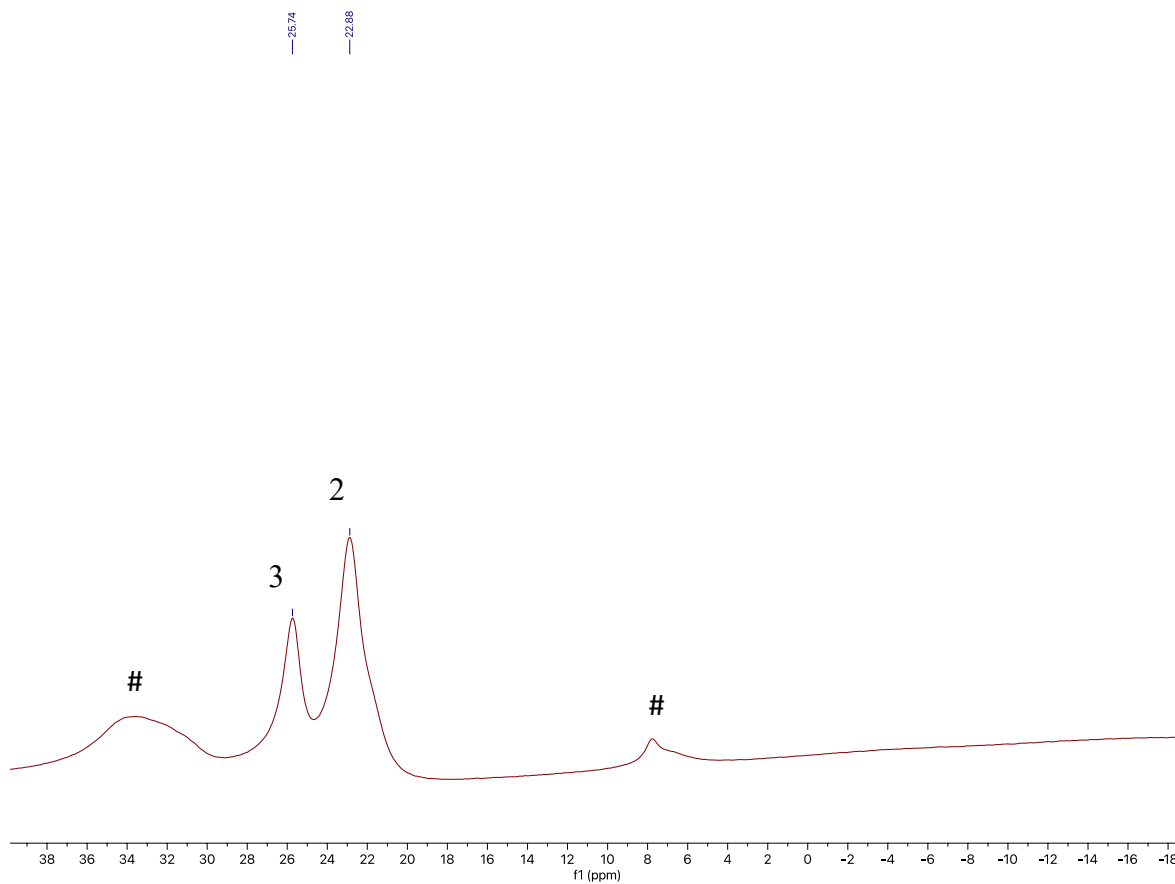

**Figure S21.**  $^{11}\text{B}$  NMR spectrum of a **2** and **3** mixture in toluene- $d_8$ . **2** = Complex **2**, **3** = Complex **3**, # = unidentified side product.

### 1.8. Stoichiometric Reaction Studies of 4 with HBpin.

In a glovebox, complex 4 (20 mg, 0.031 mmol) was weighed into a 4 mL vial, 500  $\mu\text{L}$  of toluene- $d_8$  was added, thoroughly mixed, and transferred to a J-Young NMR tube. HBpin (4.45  $\mu\text{L}$ , 0.031 mmol) and mesitylene (5  $\mu\text{L}$ ) as the internal standard were syringed into the NMR tube and mixed with the solution. The sealed NMR tube was removed from the glove box and left at room temperature for the indicated reaction times (Scheme S3). The TMS peaks are not reported due to the overlapped nature of the complex mixture.

Scheme S3. Stoichiometric reaction between complex 4 and HBpin

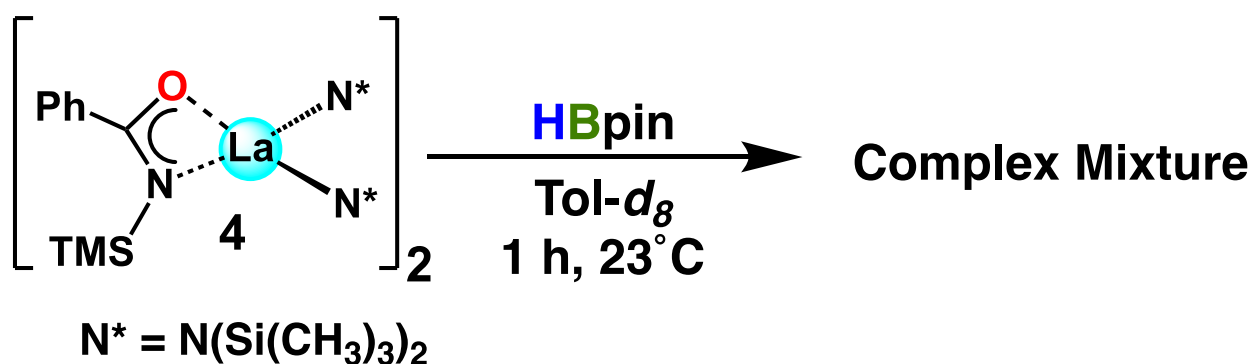

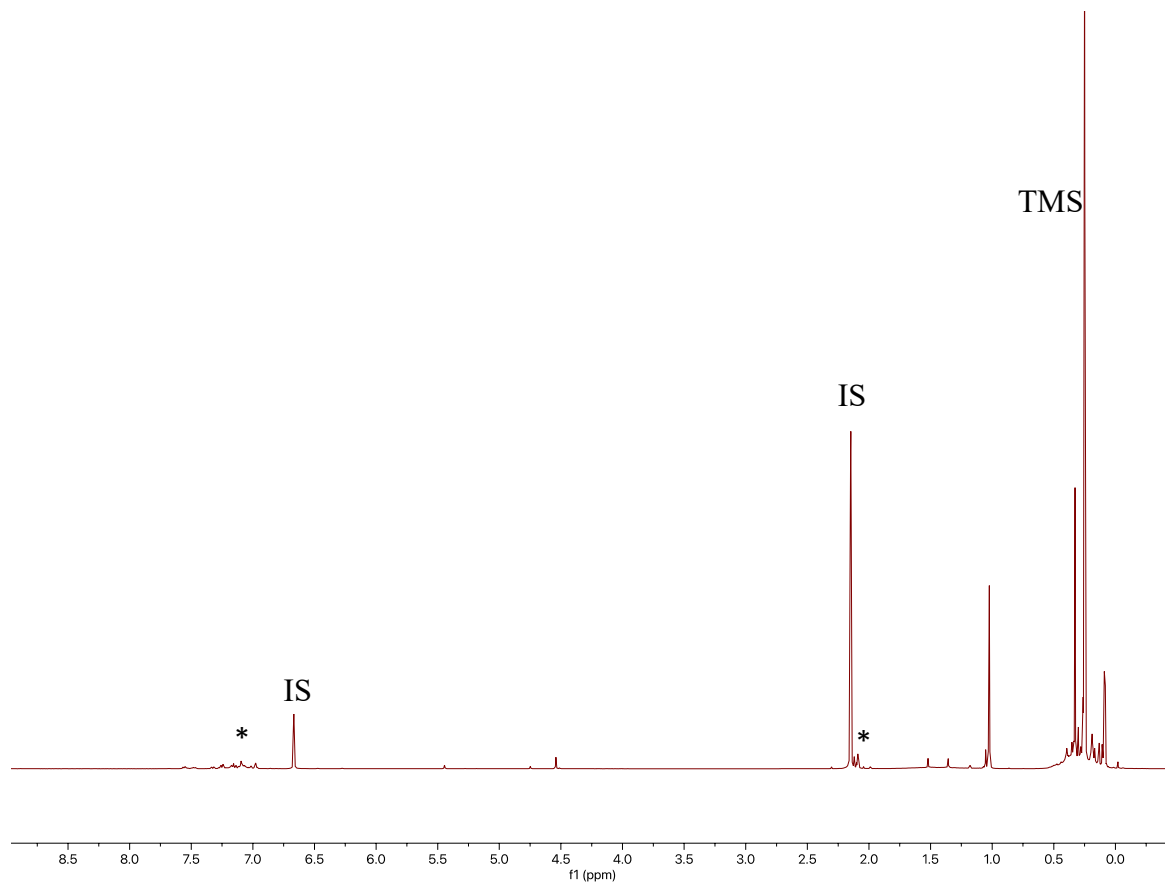

**Figure S22.**  $^1\text{H}$  NMR spectrum of the reaction between complex **4** and HBpin in toluene- $d_8$ . \* = toluene- $d_8$ , TMS =  $\text{SiMe}_3$ , IS = internal standard (mesitylene).

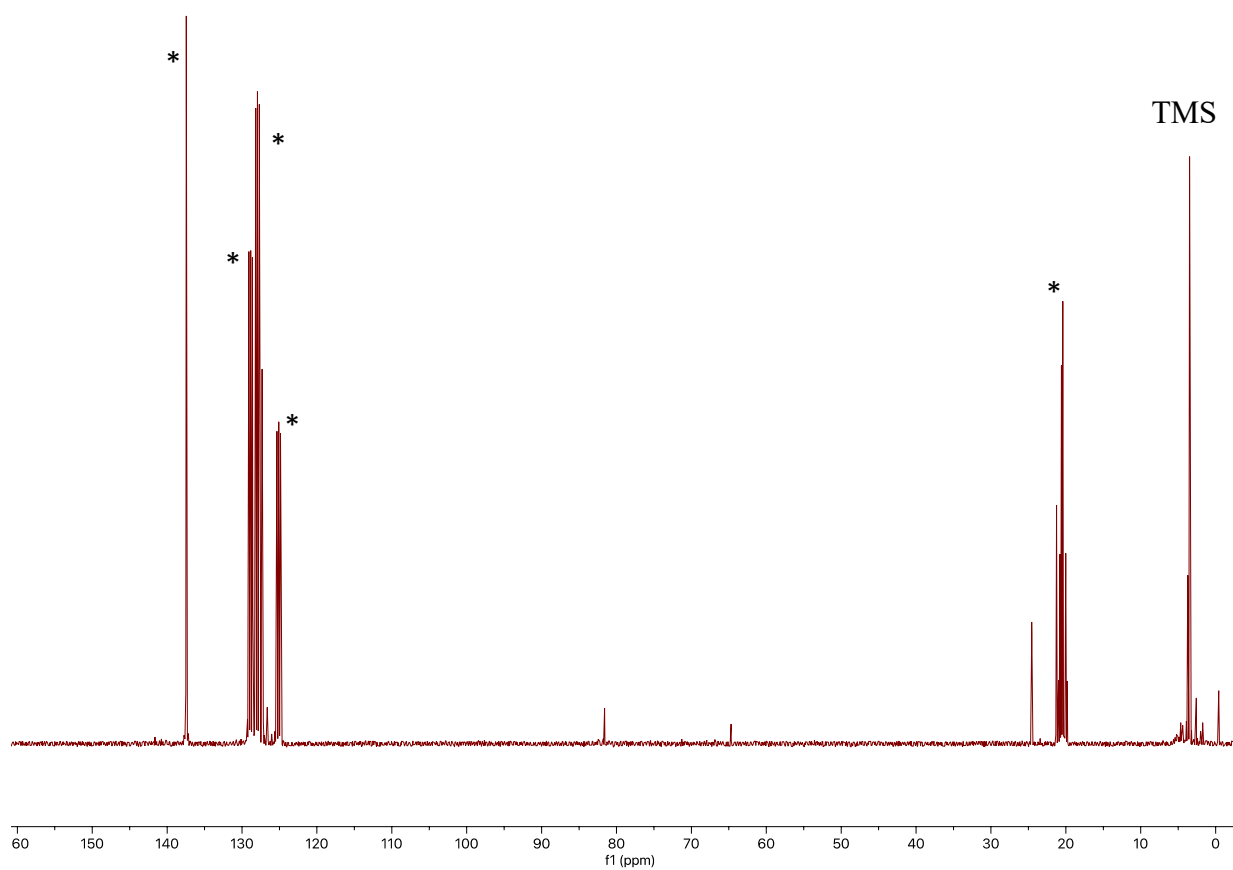

**Figure S23.**  $^{13}\text{C}$  NMR spectrum of the reaction between complex **4** and HBpin in toluene- $d_8$ . \* = toluene- $d_8$ , TMS =  $\text{SiMe}_3$ , IS = internal standard (mesitylene).



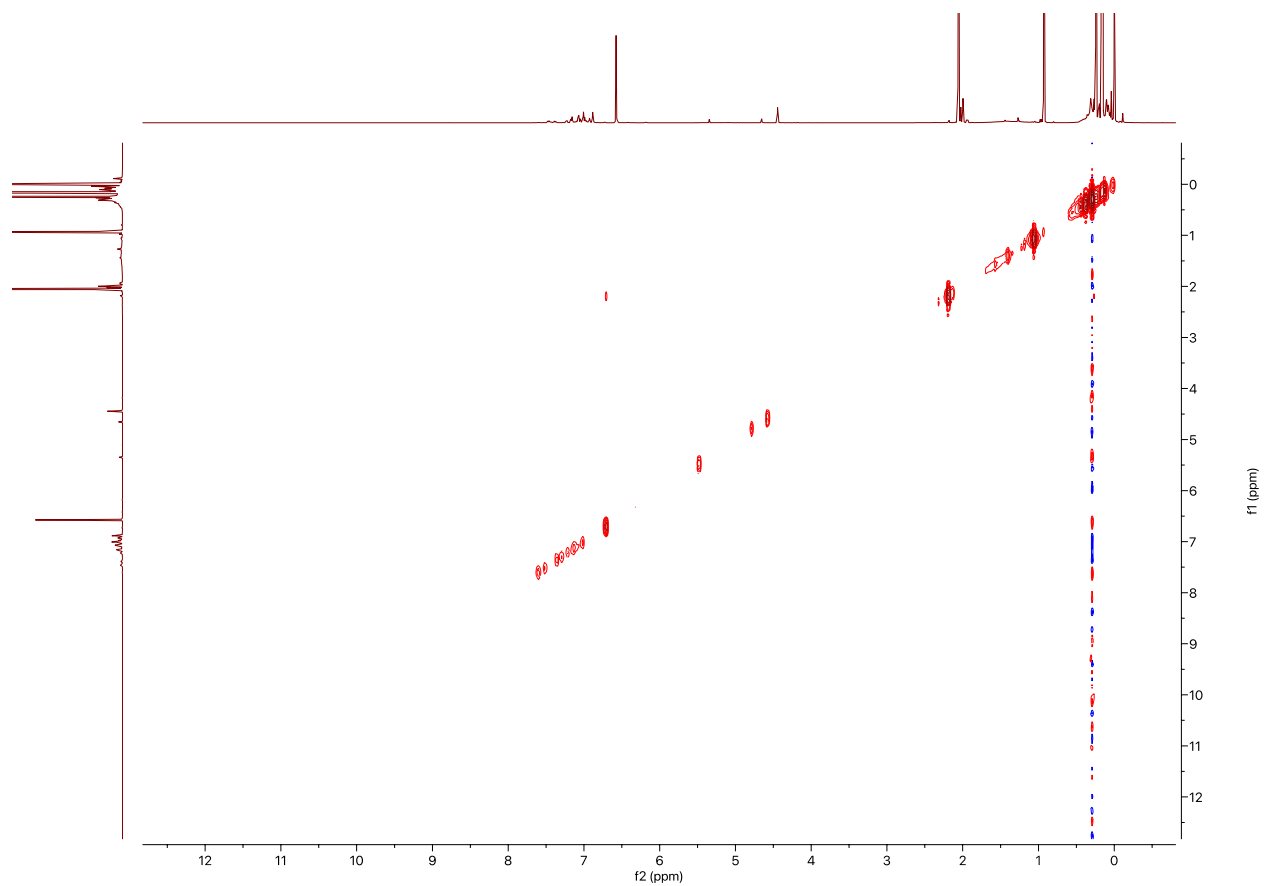

**Figure S24.**  $^1\text{H}$  –  $^1\text{H}$  COSY NMR spectrum of the reaction between complex **4** and HBpin in toluene- $d_8$ .

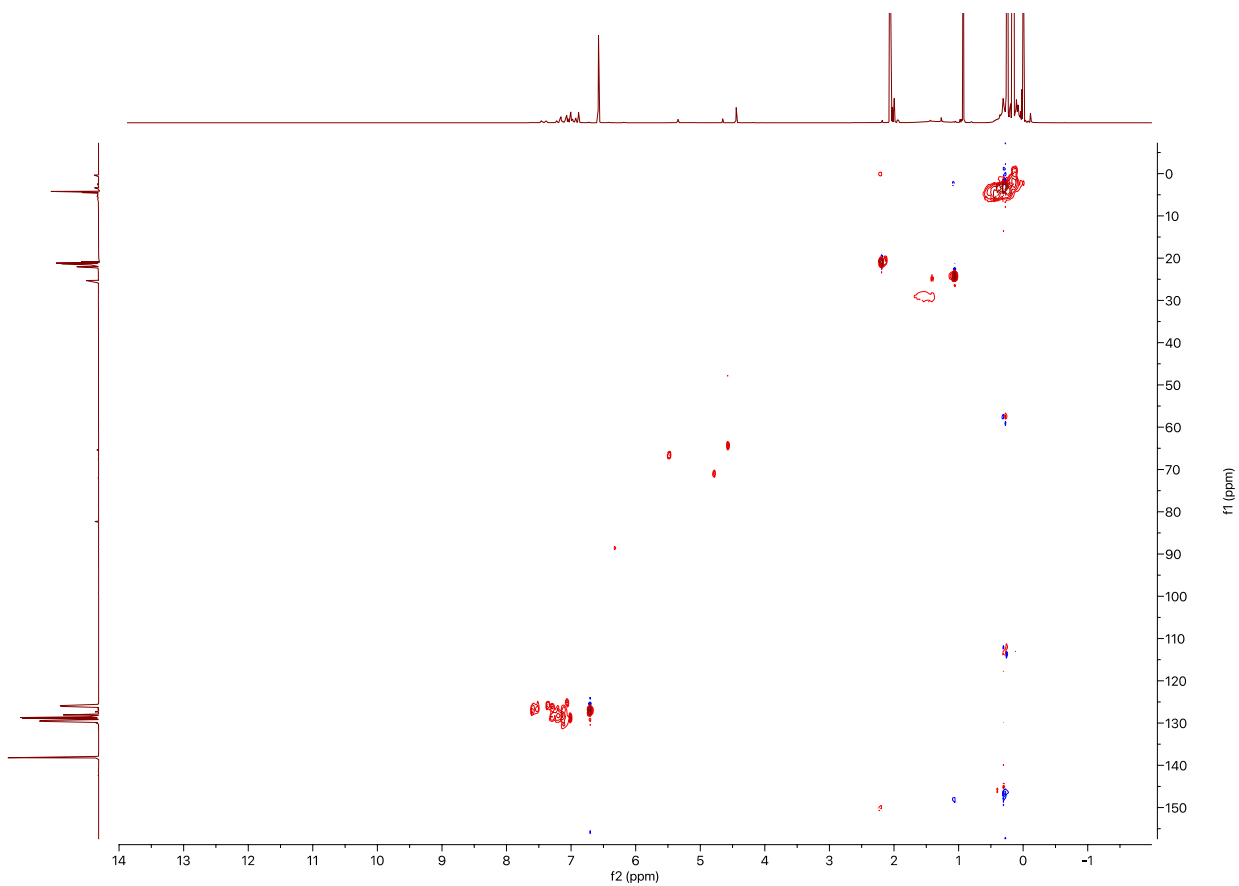

**Figure S25.**  $^1\text{H}$  –  $^{13}\text{C}$  HSQC NMR spectrum of the reaction between complex **4** and HBpin in toluene- $d_8$ .

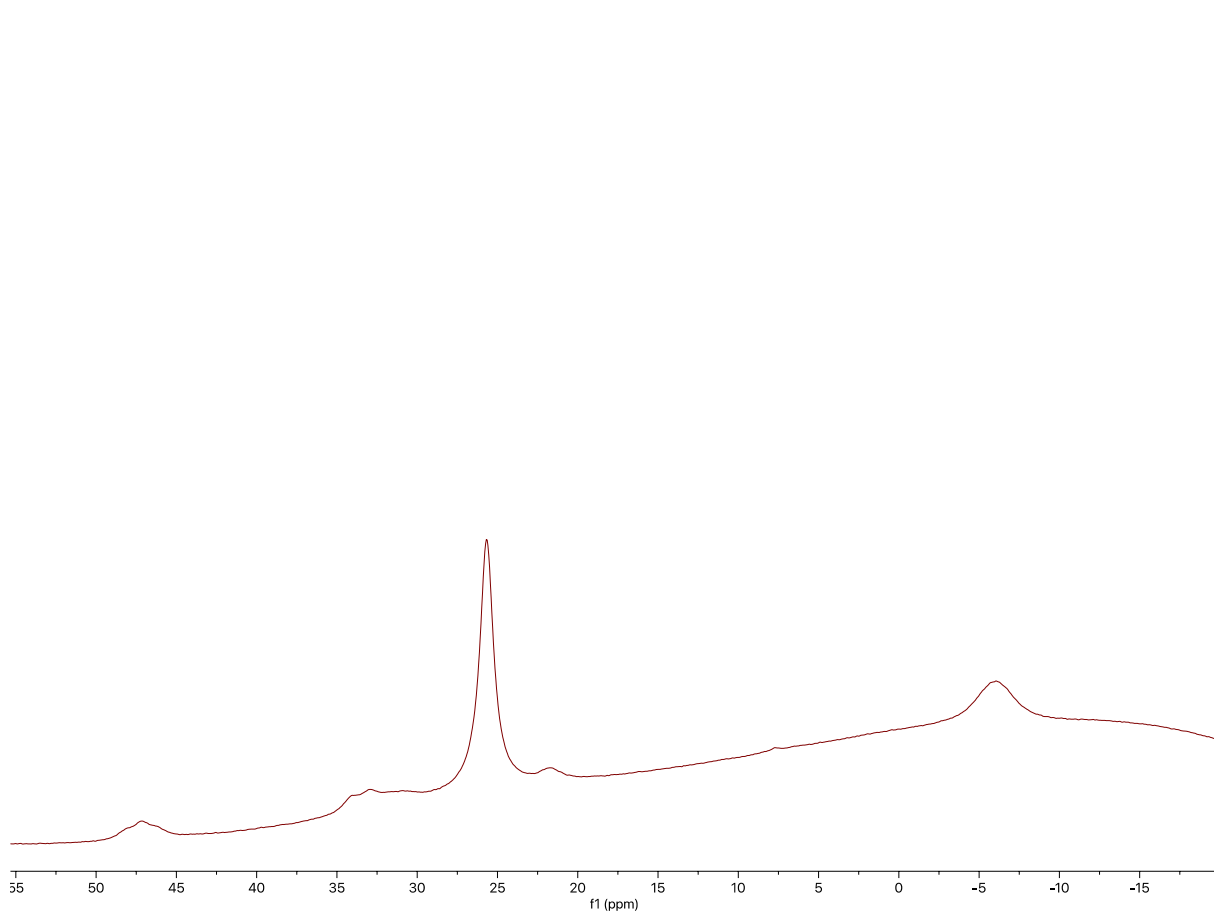

**Figure S26.**  $^{11}\text{B}$  NMR spectrum of the reaction between complex **4** and HBpin in toluene- $d_8$ .

### 1.9. Stoichiometric Reaction Studies of **8** with Benzophenone.

In a glovebox, complex **8** (40 mg, 0.027 mmol) was weighed into a 4 mL vial, 500  $\mu\text{L}$  of toluene- $d_8$  was added, thoroughly mixed, and transferred to a J-Young NMR tube. Benzophenone (5.0 mg, 0.027 mmol) and mesitylene (5  $\mu\text{L}$ ) as the internal standard were syringed into the NMR tube and mixed with the solution. The sealed NMR tube was removed from the glove box and left at room temperature for the indicated reaction times (Scheme S4). There was little reactivity, and 82% of the starting material is leftover.

**Scheme S4.** Stoichiometric reaction between complex **8** and benzophenone with no turnover.

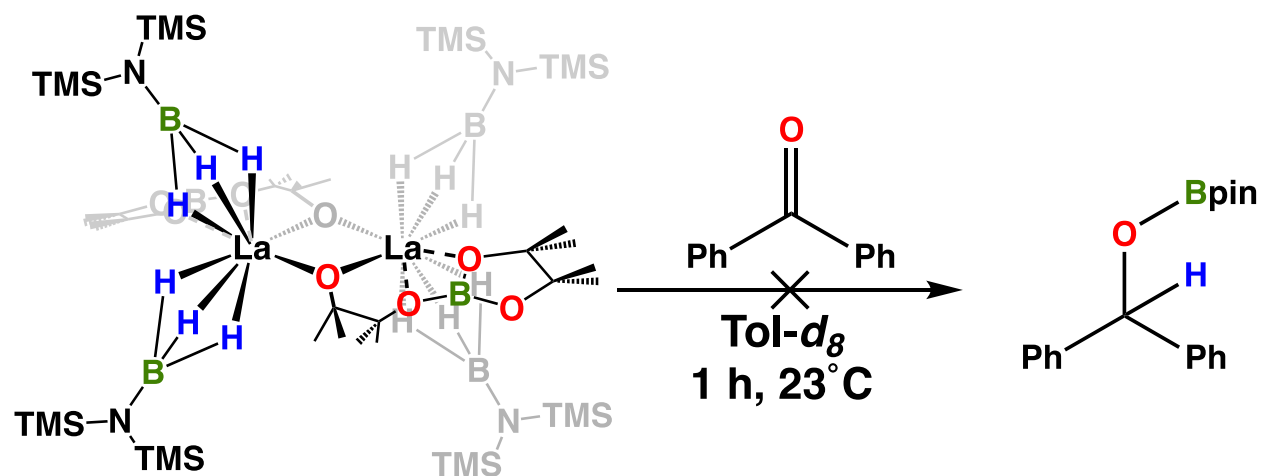

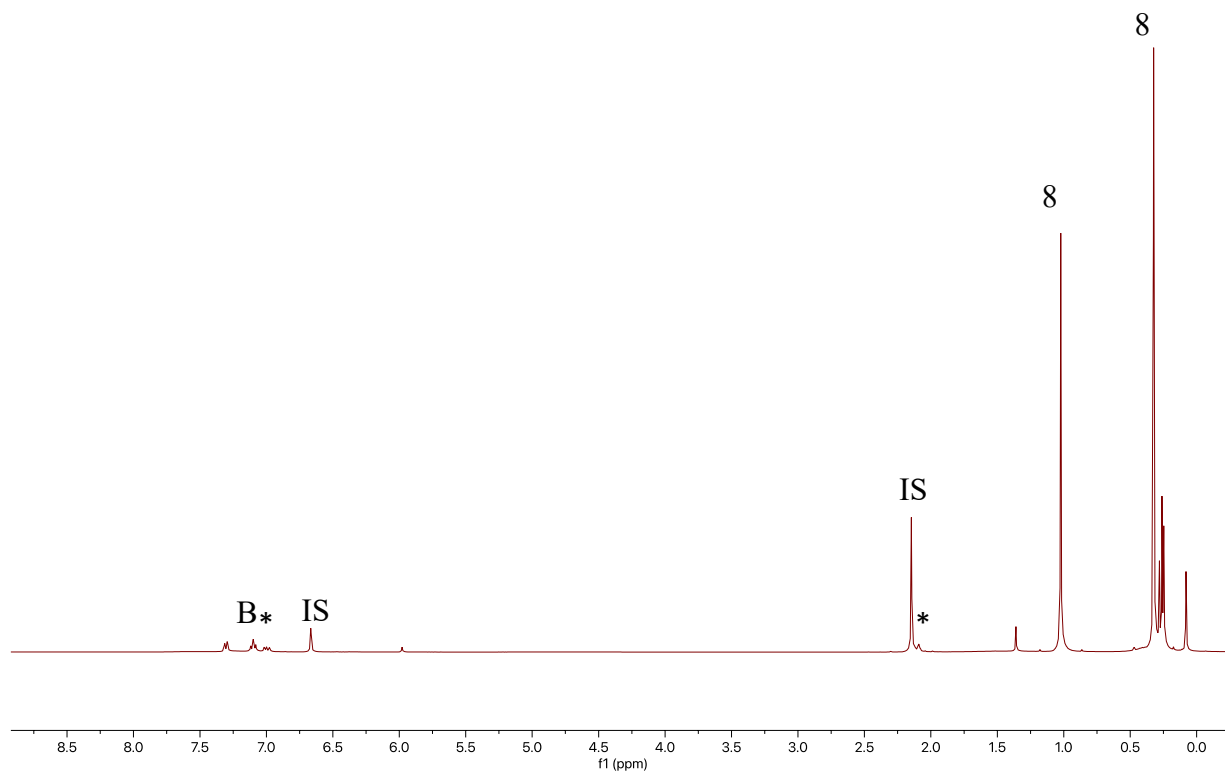

**Figure S27.**  $^1\text{H}$  NMR spectrum of the reaction between complex **8** and benzophenone in toluene- $d_8$ . **8** = Complex **8**, \* = toluene- $d_8$ , B = benzophenone, IS = internal standard (mesitylene).

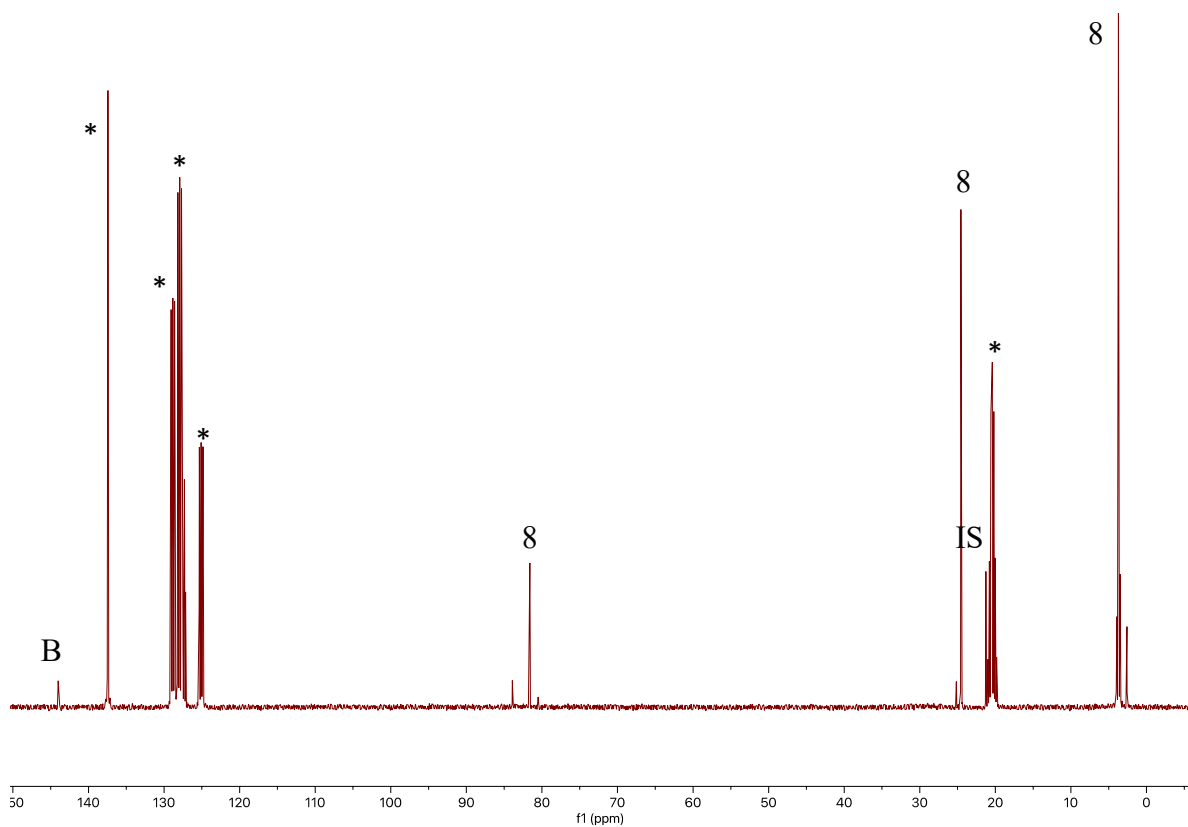

**Figure S28.**  $^{13}\text{C}$  NMR spectrum of the reaction between complex **8** and benzophenone in toluene- $d_8$ . **8** = Complex **8**, \* = toluene- $d_8$ , **B** = benzophenone, **IS** = internal standard (mesitylene).

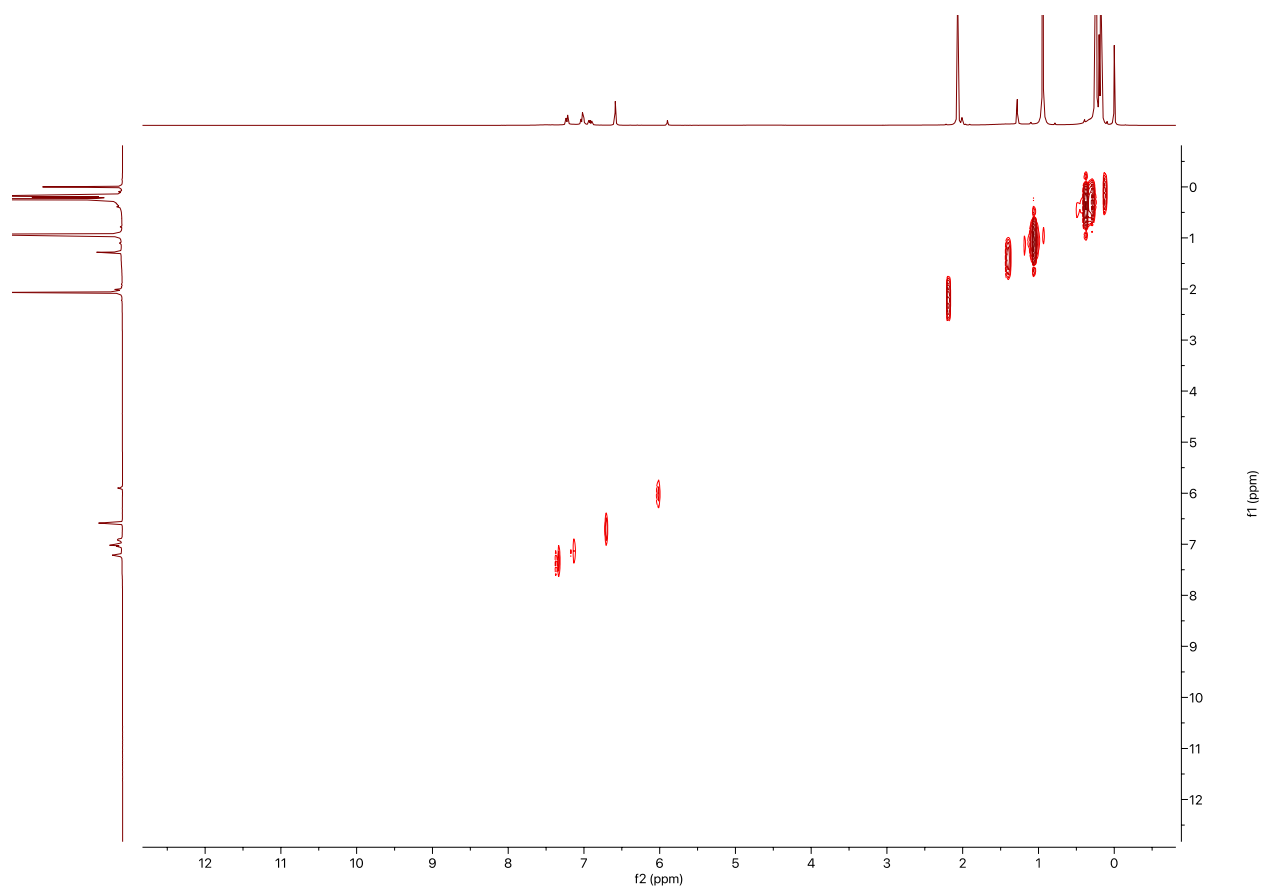

**Figure S29.**  $^1\text{H}$  –  $^1\text{H}$  COSY NMR spectrum of the reaction between complex **8** and benzophenone in toluene- $d_8$ .

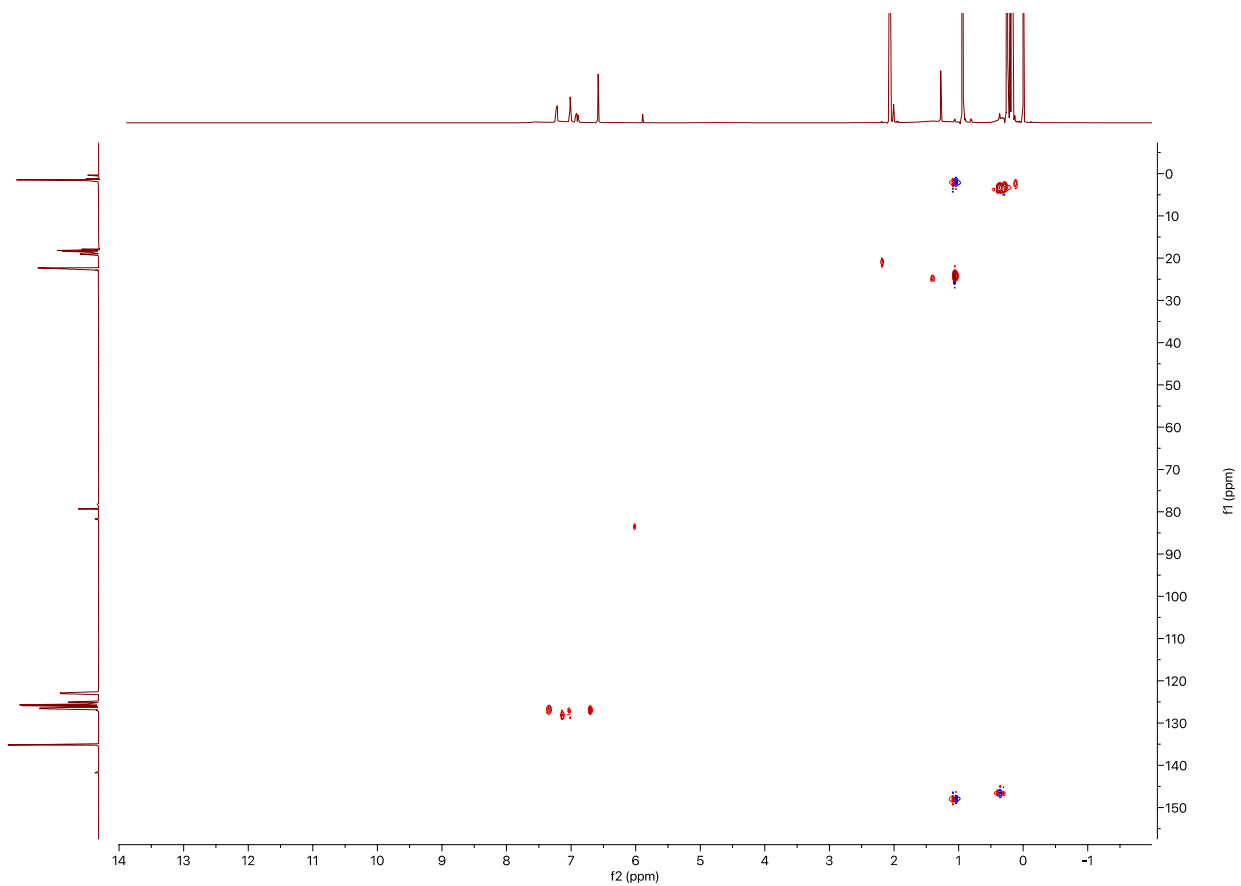

**Figure S30.**  $^1\text{H}$  –  $^{13}\text{C}$  HSQC NMR spectrum of the reaction between complex **8** and benzophenone in toluene- $d_8$ .



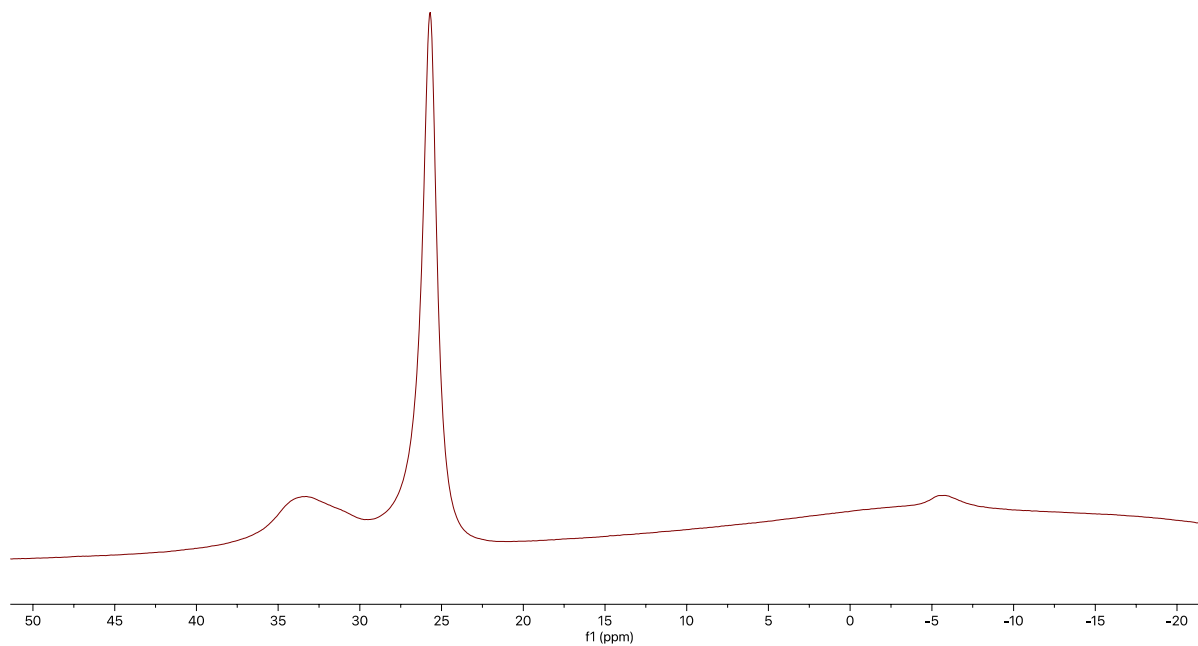

**Figure S31.**  $^{11}\text{B}$  NMR spectrum of the reaction between complex **8** and benzophenone in toluene- $d_8$ . **8** = Complex **8**, # = unidentified side product.

**8**

### 1.10. Stoichiometric Reaction Studies of **8** with Benzaldehyde.

In a glovebox, complex **8** (40 mg, 0.027 mmol) was weighed into a 4 mL vial, 500  $\mu\text{L}$  of toluene- $d_8$  was added, thoroughly mixed, and transferred to a J-Young NMR tube. Benzaldehyde (2.8  $\mu\text{L}$ , 0.027 mmol) and mesitylene (5  $\mu\text{L}$ ) as the internal standard were syringed into the NMR tube and mixed with the solution. The sealed NMR tube was removed from the glove box and left at room temperature for the indicated reaction times (Scheme S5).

**Scheme S5.** Stoichiometric reaction between complex **8** and benzaldehyde with no turnover.

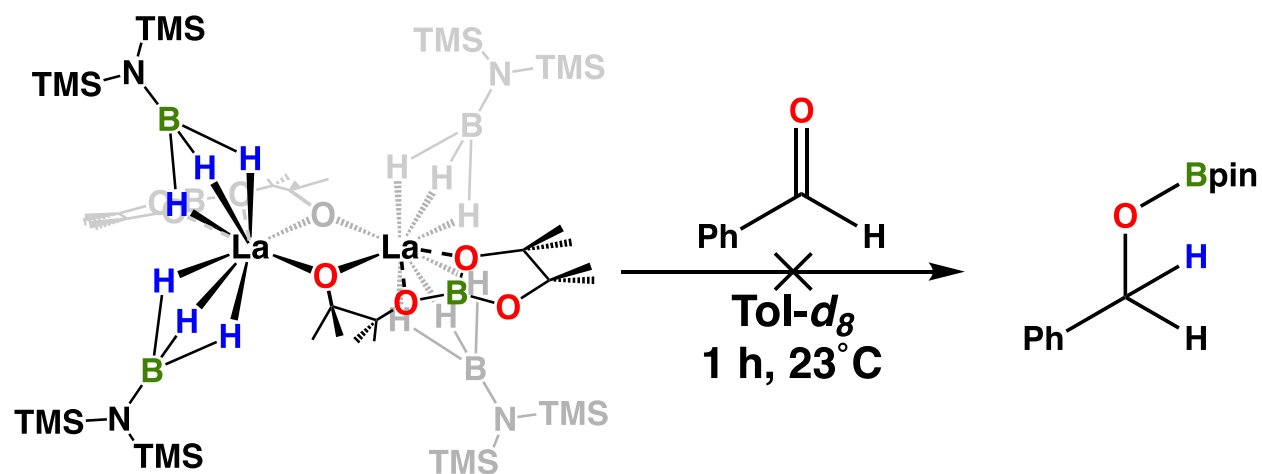

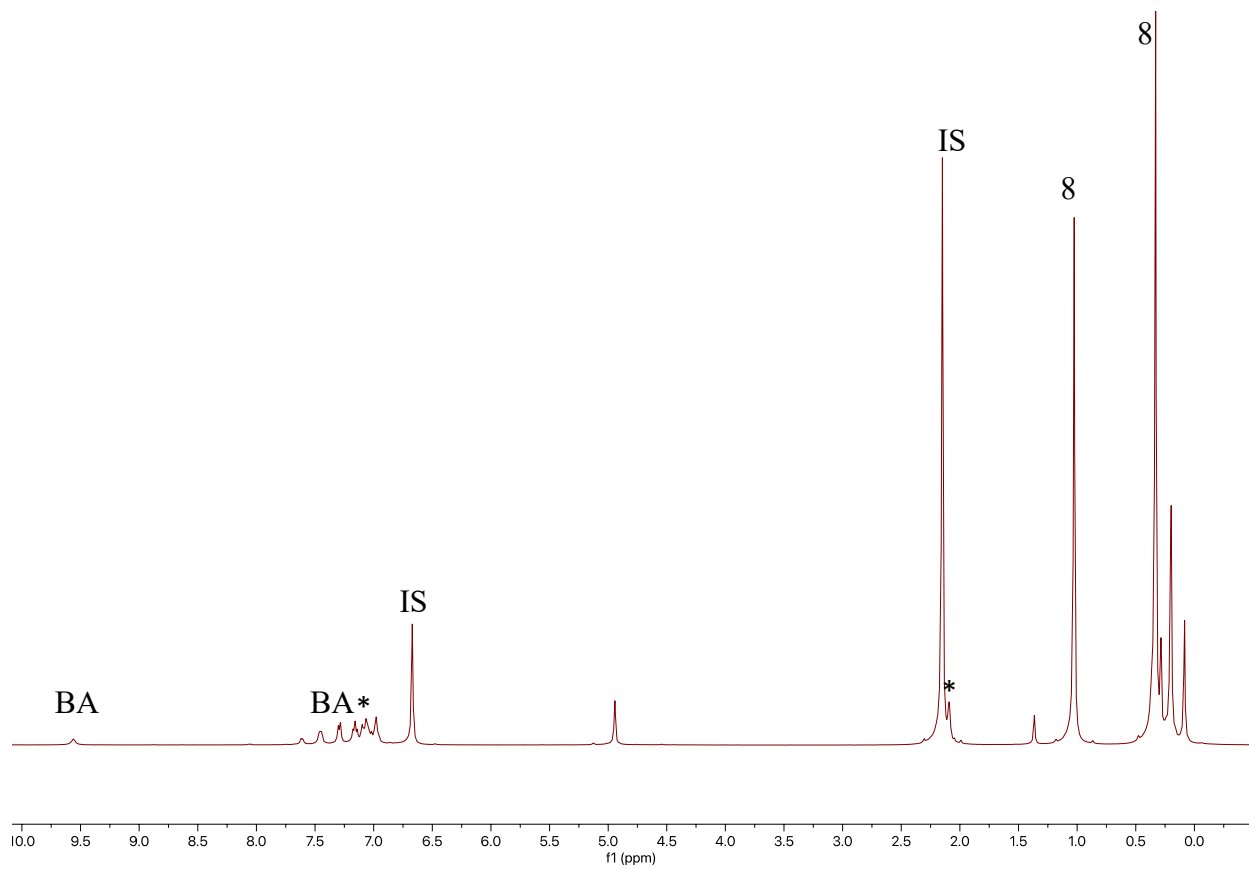

**Figure S32.**  $^1\text{H}$  NMR spectrum of the reaction between complex **8** and benzophenone in toluene- $d_8$ . **8** = Complex **8**, \* = toluene- $d_8$ , BA = benzaldehyde, IS = internal standard (mesitylene).

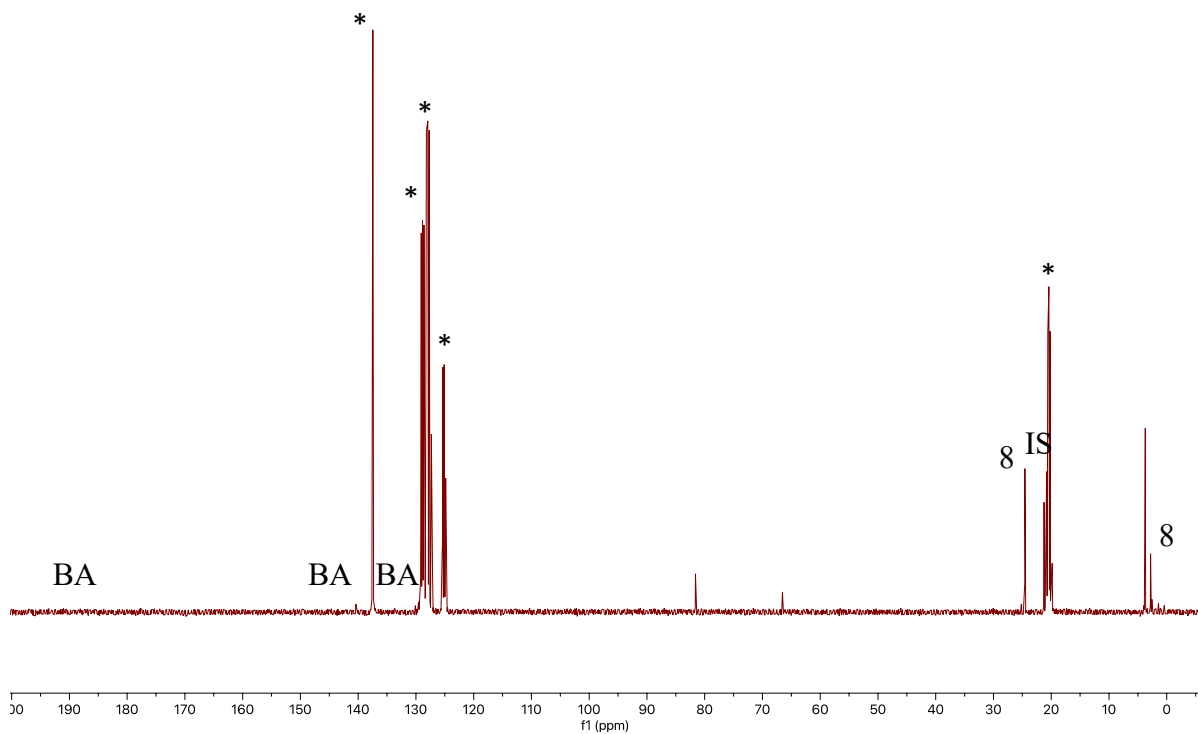

**Figure S33.**  $^{13}\text{C}$  NMR spectrum of the reaction between complex **8** and benzophenone in toluene- $d_8$ . **8** = Complex **8**, \* = toluene- $d_8$ , BA = benzaldehyde, IS = internal standard (mesitylene).

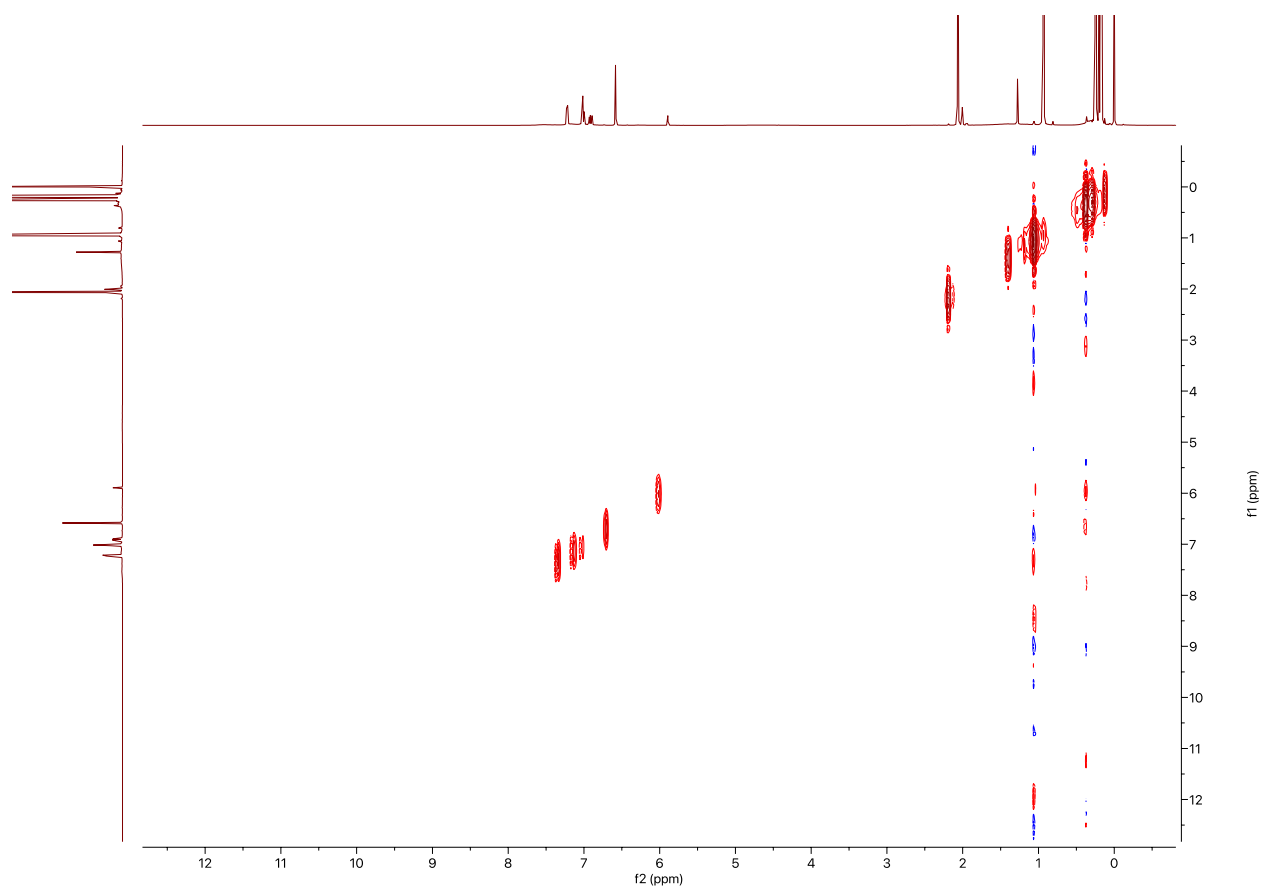

**Figure S34.**  $^1\text{H}$  –  $^1\text{H}$  COSY NMR spectrum of the reaction between complex **8** and benzaldehyde in toluene- $d_8$ .

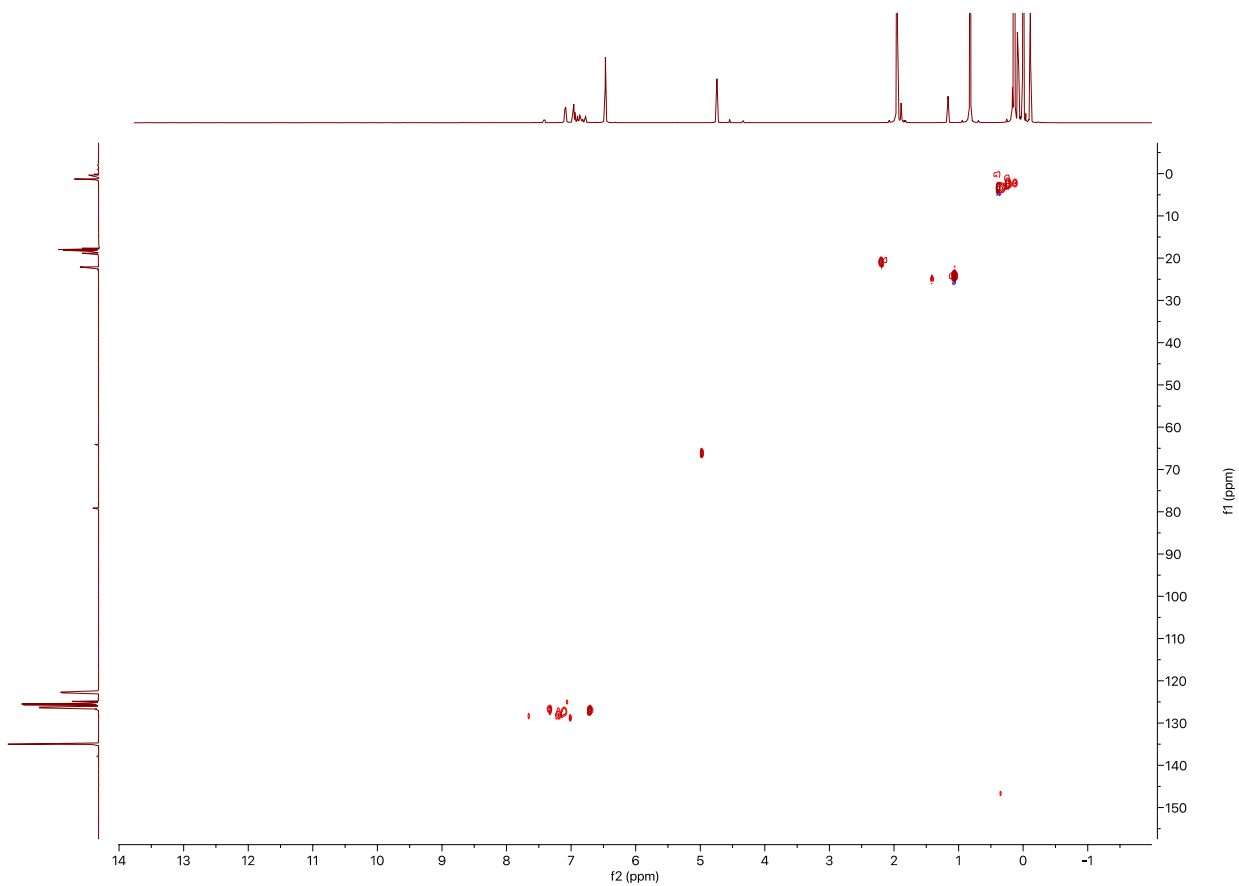

**Figure S35.**  $^1\text{H}$  –  $^{13}\text{C}$  HSQC NMR spectrum of the reaction between complex **8** and benzaldehyde in toluene- $d_8$ .

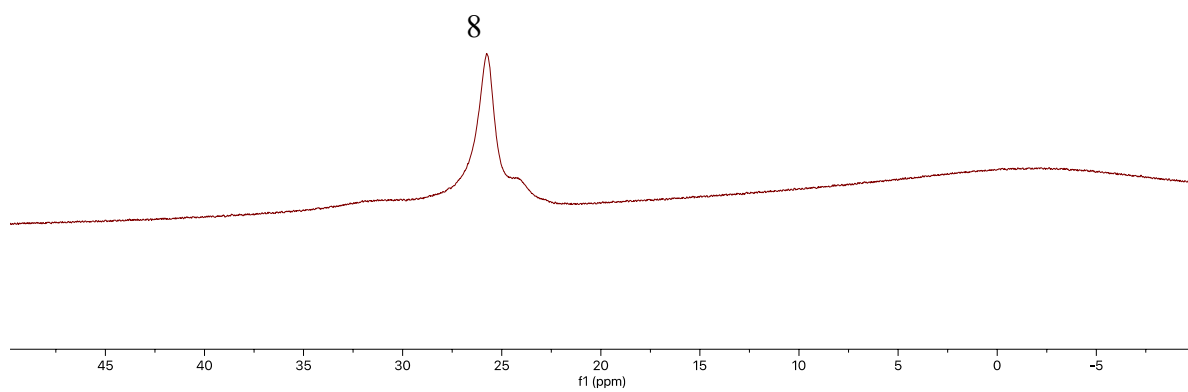

**Figure S36.**  $^{11}\text{B}$  NMR spectrum of the reaction between complex **8** and benzaldehyde in toluene- $d_8$ . **8** = Complex **8**.

### 1.11. Procedure for NMR-Scale Catalytic Reactions

In a glovebox,  $\text{La}^{\text{NTMS}}$  (3 mg, 0.005 mmol) was weighed into a 4 mL vial, 500  $\mu\text{L}$  of toluene- $d_8$  was added, thoroughly mixed, and transferred to a J-Young NMR tube. Benzaldehyde (49.4  $\mu\text{L}$ , 0.484 mmol) and mesitylene (5  $\mu\text{L}$ ) as the internal standard were syringed into the NMR tube and mixed with the solution. The sealed NMR tube was removed from the glove box and left at room temperature for the indicated reaction times (Scheme S6). After 4 h, HBpin was added to the solution (Fig. S38).

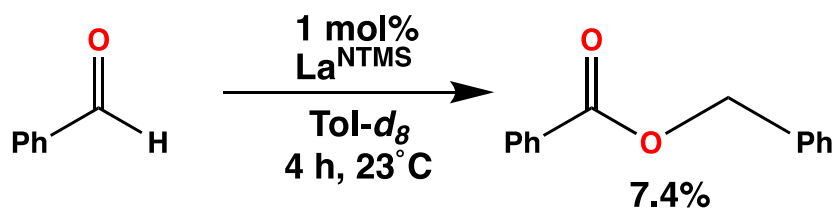

**Scheme S6.** Catalytic reaction between  $\text{La}^{\text{NTMS}}$  and benzaldehyde



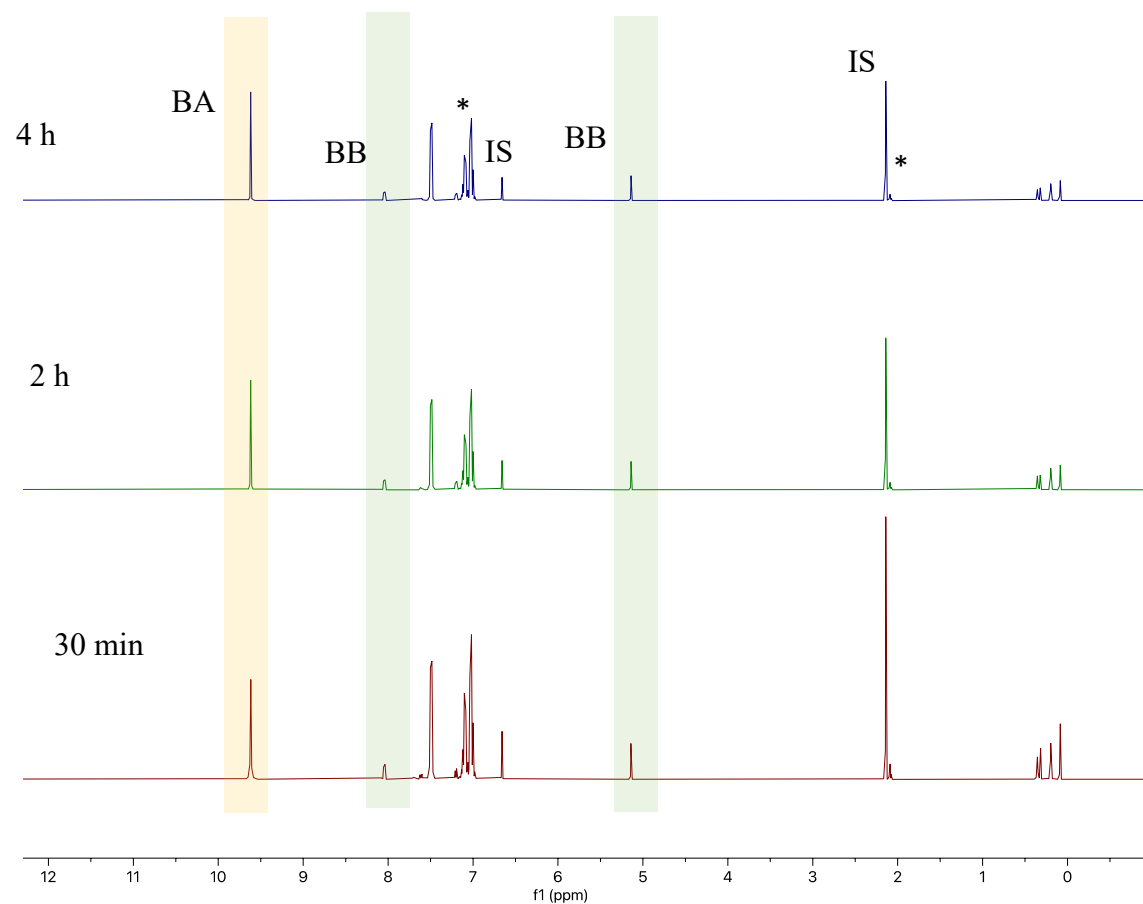

**Figure S37.** Stacked <sup>1</sup>H NMR spectra of the reaction in Scheme S6 after 30 minutes, 2 hours, and 4 hours. BA = benzaldehyde (highlighted in yellow), BB = benzyl benzoate (highlighted in blue), IS = internal standard (mesitylene), \* = toluene-*d*<sub>8</sub>.

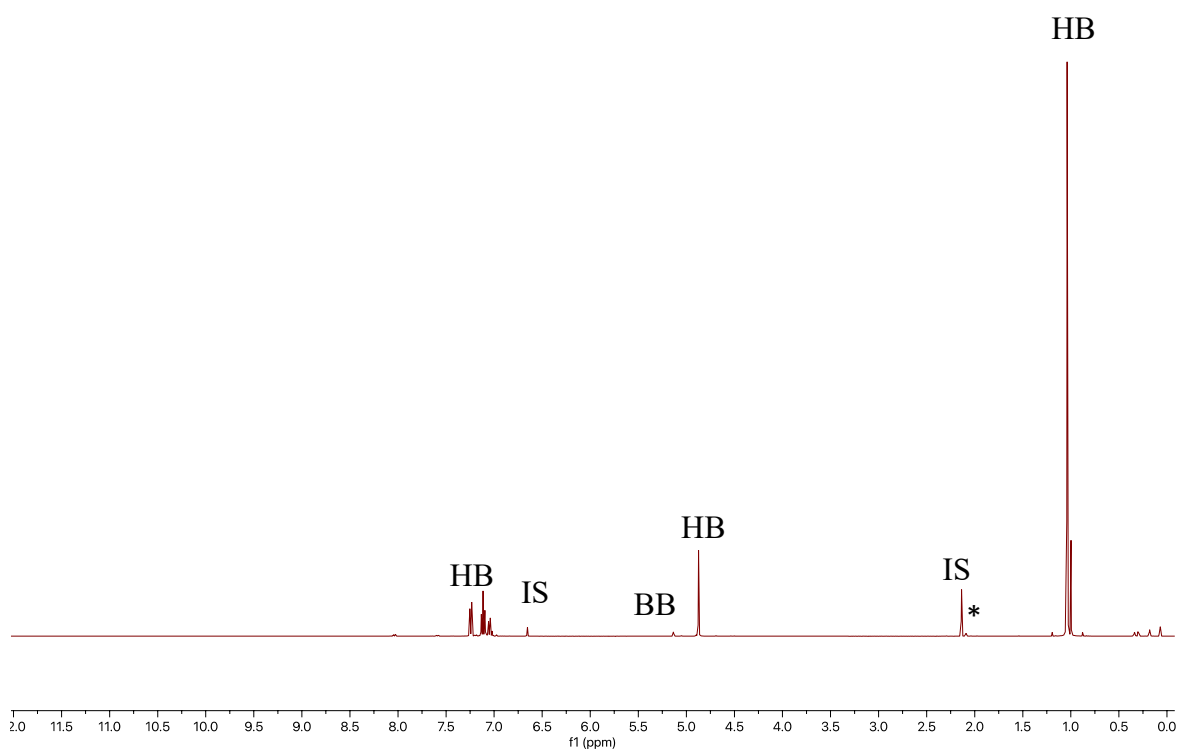

**Figure S38.**  $^1\text{H}$  NMR of the reaction from addition of HBpin to Scheme S6 after 1 h. BB = benzyl benzoate, IS = internal standard (mesitylene), HB = hydroborated product (**6**), \* = toluene- $d_8$ .

### 1.12. X-ray Data Collection, Structure Solution, and Refinement

Single crystals of  $C_{31}H_{64}LaN_3OSi_6$  suitable for diffraction were grown by cooling a concentrated toluene solution and were then washed with cold toluene. A suitable crystal was selected, and the crystal was mounted on a MITIGEN holder with Paratone oil on a XtaLAB Synergy, Single source at offset/far, HyPix diffractometer. The crystal was kept at 100.00(10) K during data collection. Using Olex2,<sup>3</sup> the structure was solved with the ShelXT<sup>4</sup> structure solution program using Intrinsic Phasing and refined with the XL<sup>5</sup> refinement package using Least Squares minimization. Crystallographic and experimental details of the structure determination are summarized in Table S1. (CCDC 2196153)

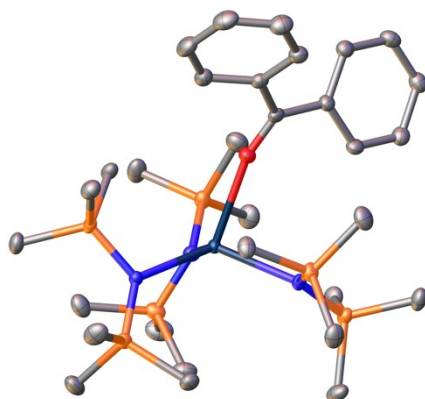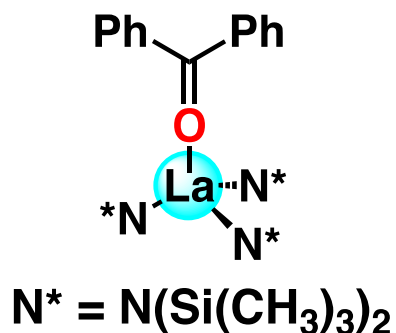

**Table S1:** Crystal data and structure refinement for  $C_{31}H_{64}LaN_3OSi_6$

|                   |                          |
|-------------------|--------------------------|
| Empirical formula | $C_{31}H_{64}LaN_3OSi_6$ |
| Formula weight    | 802.30                   |
| Temperature / K   | 100.00(10)               |
| Crystal system    | monoclinic               |

|                                             |                                                   |
|---------------------------------------------|---------------------------------------------------|
| Space group                                 | P2 <sub>1</sub> /n                                |
| a / Å, b / Å, c / Å                         | 11.6736(2), 18.4590(3), 20.0226(3)                |
| $\alpha$ /°, $\beta$ /°, $\gamma$ /°        | 90, 93.0920(10), 90                               |
| Volume / Å <sup>3</sup>                     | 4308.25(12)                                       |
| Z                                           | 4                                                 |
| $\rho_{\text{calc}}$ / mg mm <sup>-3</sup>  | 1.237                                             |
| $\mu$ / mm <sup>-1</sup>                    | 1.184                                             |
| F(000)                                      | 1680                                              |
| Crystal size / mm <sup>3</sup>              | 0.229 × 0.154 × 0.031                             |
| 2 $\Theta$ range for data collection        | 4.074 to 67.476°                                  |
| Index ranges                                | -16 ≤ h ≤ 17, -26 ≤ k ≤ 28, -28 ≤ l ≤ 31          |
| Reflections collected                       | 61050                                             |
| Independent reflections                     | 15032[R(int) = 0.0360]                            |
| Data/restraints/parameters                  | 15032/0/397                                       |
| Goodness-of-fit on F <sup>2</sup>           | 1.022                                             |
| Final R indexes [I > 2 $\sigma$ (I)]        | R <sub>1</sub> = 0.0315, wR <sub>2</sub> = 0.0583 |
| Final R indexes [all data]                  | R <sub>1</sub> = 0.0451, wR <sub>2</sub> = 0.0619 |
| Largest diff. peak/hole / e Å <sup>-3</sup> | 0.545/-0.583                                      |

Single crystals of  $C_{22}H_{50}LaN_3OSi_5$  suitable for diffraction analysis were grown by slow cooling a concentrated toluene solution and were then washed with cold toluene. A suitable crystal was selected, and the crystal was mounted on a MITIGEN holder in paratone oil on a XtaLAB Synergy, Single source at offset/far, HyPix diffractometer. The crystal was kept at 100.0(2) K during data collection. Using Olex2<sup>3</sup> the structure was solved with the SHELXT<sup>4</sup> structure solution program using Intrinsic Phasing and refined with the XL<sup>5</sup> refinement package using Least Squares minimizations. Crystallographic and experimental details of the structure determination are

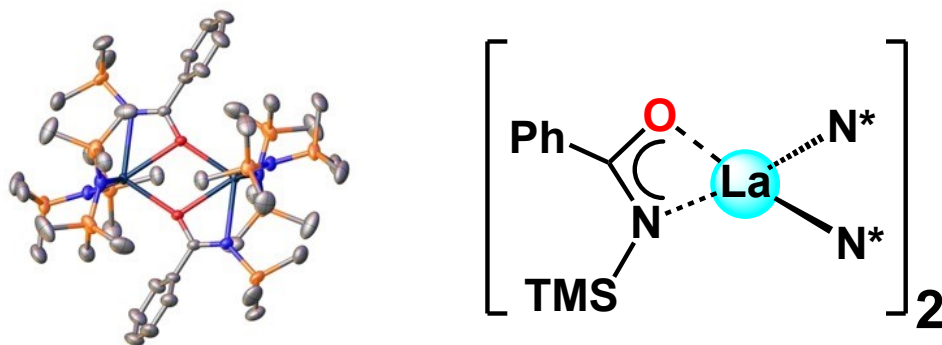

summarized in Table S2. (CCDC 2196157)

**Table S2:** Crystal data and structure refinement for  $C_{22}H_{50}LaN_3OSi_5$

|                                                          |                                    |
|----------------------------------------------------------|------------------------------------|
| Empirical formula                                        | $C_{22}H_{50}LaN_3OSi_5$           |
| Formula weight                                           | 652.01                             |
| Temperature / K                                          | 100.0(2)                           |
| Crystal system                                           | monoclinic                         |
| Space group                                              | $P2_1/c$                           |
| $a / \text{\AA}$ , $b / \text{\AA}$ , $c / \text{\AA}$   | 21.1647(3), 15.1053(2), 21.1116(3) |
| $\alpha / ^\circ$ , $\beta / ^\circ$ , $\gamma / ^\circ$ | 90, 90.8294(13), 90                |

|                                             |                                                   |
|---------------------------------------------|---------------------------------------------------|
| Volume / Å <sup>3</sup>                     | 6748.65(17)                                       |
| Z                                           | 8                                                 |
| ρ <sub>calc</sub> / mg mm <sup>-3</sup>     | 1.283                                             |
| μ / mm <sup>-1</sup>                        | 1.461                                             |
| F(000)                                      | 2704                                              |
| Crystal size / mm <sup>3</sup>              | 0.165 × 0.086 × 0.05                              |
| 2θ range for data collection                | 4.288 to 61.968°                                  |
| Index ranges                                | -30 ≤ h ≤ 27, -21 ≤ k ≤ 21, -28 ≤ l ≤ 28          |
| Reflections collected                       | 80750                                             |
| Independent reflections                     | 17623[R(int) = 0.0556]                            |
| Data/restraints/parameters                  | 17623/210/695                                     |
| Goodness-of-fit on F <sup>2</sup>           | 1.048                                             |
| Final R indexes [I > 2σ (I)]                | R <sub>1</sub> = 0.0372, wR <sub>2</sub> = 0.0842 |
| Final R indexes [all data]                  | R <sub>1</sub> = 0.0562, wR <sub>2</sub> = 0.0934 |
| Largest diff. peak/hole / e Å <sup>-3</sup> | 1.736/-1.080                                      |

Single crystals of  $C_{55}H_{140}B_6La_2N_4O_8Si_8$  suitable for diffraction were grown by slow cooling a concentrated toluene solution and were then washed with cold toluene. A suitable crystal was selected, and the crystal was mounted on a MITIGEN holder in paratone oil on a XtaLAB Synergy, Single source at offset/far, HyPix diffractometer. The crystal was kept at 100.00(10) K during data collection. Using Olex2<sup>3</sup>, the structure was solved with the SHELXT<sup>4</sup> structure solution program using Intrinsic Phasing and refined with the XL<sup>5</sup> refinement package using Least Squares minimization. Crystallographic and experimental details of the structure determination are

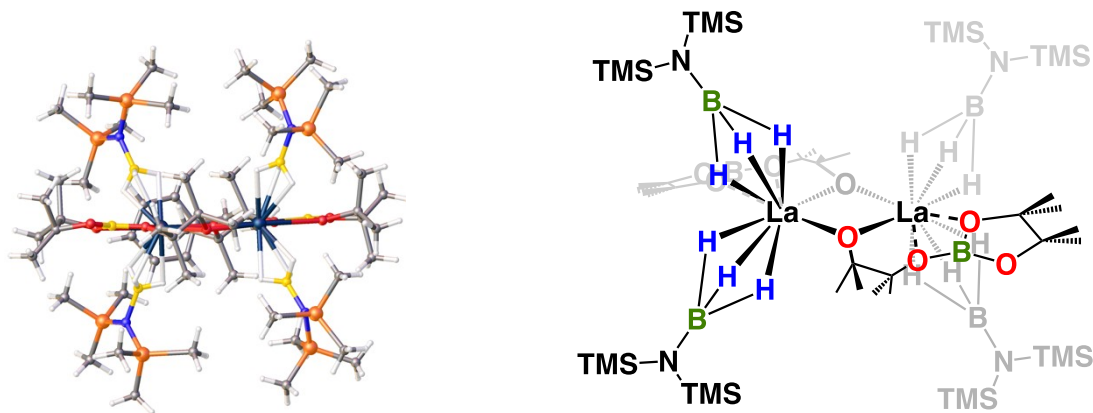

summarized in Table S3. (CCDC 2196158)

**Table S3:** Crystal data and structure refinement for  $C_{55}H_{140}B_6La_2N_4O_8Si_8$

|                     |                                    |
|---------------------|------------------------------------|
| Empirical formula   | $C_{55}H_{140}B_6La_2N_4O_8Si_8$   |
| Formula weight      | 1553.10                            |
| Temperature / K     | 100.00(10)                         |
| Crystal system      | monoclinic                         |
| Space group         | Cc                                 |
| a / Å, b / Å, c / Å | 27.6404(7), 15.2264(3), 24.7520(7) |

|                                               |                                                              |
|-----------------------------------------------|--------------------------------------------------------------|
| $\alpha/^\circ, \beta/^\circ, \gamma/^\circ$  | 90, 123.939(4), 90                                           |
| Volume / $\text{\AA}^3$                       | 8642.5(5)                                                    |
| Z                                             | 4                                                            |
| $\rho_{\text{calc}} / \text{mg mm}^{-3}$      | 1.194                                                        |
| $\mu / \text{mm}^{-1}$                        | 1.128                                                        |
| F(000)                                        | 3272                                                         |
| Crystal size / $\text{mm}^3$                  | $0.133 \times 0.127 \times 0.058$                            |
| $2\Theta$ range for data collection           | 4.264 to 56.674 $^\circ$                                     |
| Index ranges                                  | $-36 \leq h \leq 36, -20 \leq k \leq 20, -33 \leq l \leq 33$ |
| Reflections collected                         | 139797                                                       |
| Independent reflections                       | 21472[R(int) = 0.0684]                                       |
| Data/restraints/parameters                    | 21472/835/810                                                |
| Goodness-of-fit on $F^2$                      | 1.039                                                        |
| Final R indexes [ $I > 2\sigma(I)$ ]          | $R_1 = 0.0536, wR_2 = 0.1334$                                |
| Final R indexes [all data]                    | $R_1 = 0.0673, wR_2 = 0.1415$                                |
| Largest diff. peak/hole / $e \text{\AA}^{-3}$ | 1.758/-0.766                                                 |



## 2. Computational Details

Geometry optimizations of all reactants, products, intermediates, and transition states were carried out along the entire catalytic cycle. Calculations were performed adopting the M06 hybrid meta-GGA functional. The effective core potential of Hay and Wadt,<sup>6, 7</sup> (LANL2DZ) and the relative basis set were used for the La and Si atoms. The standard all-electron 6-31G\*\* basis<sup>8</sup> was used for all the remaining atoms. Molecular geometry optimization of stationary points was carried out without symmetry constraints and used analytical gradient techniques. The transition states were searched with the “distinguished reaction coordinate procedure” along the emerging bonds. Cyclohexylaldehyde and dicyclohexylketone were adopted as substrate models. Frequency analysis was performed to obtain thermochemical information about the reaction pathways at 298 K using the harmonic approximation. The Gibbs free energy of solvation is taken into account within the SMD model.<sup>9</sup> Moreover, the effect of concentration on moving from 1 atm to 1 M is accounted for by adding an energy contribution of 1.89 kcal/mol ( $RT\ln(P_{1M}/P_{1atm})$ ) to each species. All calculations were performed using the G16 code<sup>10</sup> on a Linux cluster system.

**Table S4.** DFT derived and solid-state bond lengths (Å) from complex **1**

| Complex <b>1</b> | La(1) - O(1) | La(1) - N(1) | O(1) - C(1) |
|------------------|--------------|--------------|-------------|
| DFT              | 2.536        | 2.383        | 1.241       |
| Solid-State      | 2.502        | 2.393        | 1.241       |

**Table S5.** DFT derived and solid-state bond lengths (Å) from complex **4**

| Complex <b>4</b> | La(1) - O(1) | La(1) - N(1) | O(1) - C(1) | La(1) - N(2) | N(1) - C(1) |
|------------------|--------------|--------------|-------------|--------------|-------------|
| DFT              | 2.680        | 2.628        | 1.308       | 2.382        | 1.300       |
| Solid-State      | 2.627        | 2.591        | 1.327       | 2.370        | 1.290       |

## 2.1 DFT Examination of Catalyst Decomposition Pathway

DFT calculations were performed to better understand the decomposition pathway of the  $\text{La}^{\text{NTMS}}$  precatalyst induced by HBpin without the presence of either ketone or aldehyde (Figure S39). In particular, the first insertion of HBpin (**1**) leads to the formation of the pinBN(TMS)<sub>2</sub> and a La-H hydride forms as a result. This step was previously reported in the activation step of amide reduction catalyzed by  $\text{La}^{\text{NTMS}}$  complex<sup>11</sup>. The second (**2**) and third (**3**) HBpin insertions are reminiscent of the deactivation path reported in the B-N bond forming 1,2-dearomatization process described elsewhere.<sup>12</sup> In this case, the third insertion forms the  $\text{N}(\text{TMS})_2\text{-BH}_3^-$  ligand (**3a**). This intermediate then undergoes ligand exchange with another equivalent of itself to form the monomer of complex **8**. This reaction is computed to be exergonic ( $\Delta G = -18.8$  kcal/mol) and complex **8** spontaneously forms a dimer ( $\Delta G_{\text{dimerization}} = -35.1$  kcal/mol).

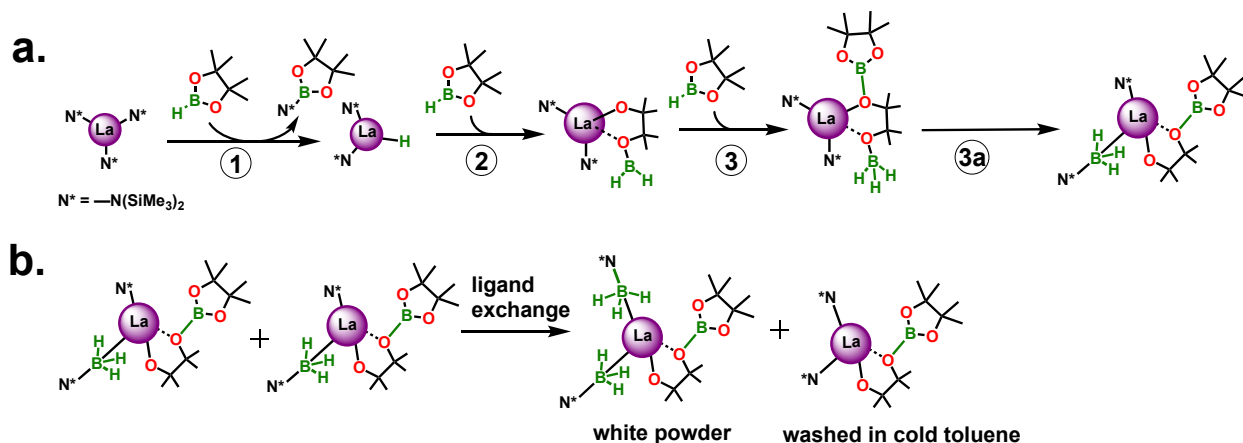

**Figure S39.** Plausible mechanistic pathway associated with the decomposition pathway of  $\text{La}^{\text{NTMS}}$  precatalyst in the presence of HBpin in the absence of ketone/aldehyde. **a.** Initial formation of deactivated complex after three additions of HBpin. **b.** Ligand exchange between two complexes to yield complex **8**.

## 2.2 Cartesian coordinates (Å) of all the investigated species described in the text

### Complex 1 formed with benzophenone (for comparison with XRD)

|    |              |              |              |
|----|--------------|--------------|--------------|
| La | -0.570746000 | -0.040918000 | -0.055651000 |
| Si | -1.364304000 | -2.535399000 | -2.518660000 |
| Si | -3.688095000 | -1.529732000 | -0.817027000 |
| Si | -1.513258000 | 2.936367000  | -1.437453000 |
| Si | -2.724346000 | 2.704473000  | 1.331419000  |
| Si | 1.339398000  | 0.411255000  | 2.897361000  |
| Si | 0.020390000  | -2.325896000 | 2.745812000  |
| O  | 1.773626000  | 0.388216000  | -0.922356000 |
| N  | -1.983005000 | -1.583531000 | -1.198294000 |
| N  | -1.762232000 | 2.031308000  | 0.032329000  |
| N  | 0.365779000  | -0.763105000 | 2.035183000  |
| C  | 3.006942000  | 0.259724000  | -0.981974000 |
| C  | 3.603315000  | -1.084339000 | -0.860320000 |
| C  | 3.009824000  | -2.010609000 | 0.009725000  |
| H  | 2.179568000  | -1.698150000 | 0.651826000  |
| C  | 3.507976000  | -3.303471000 | 0.083166000  |
| H  | 3.056156000  | -4.016470000 | 0.770183000  |
| C  | 4.574396000  | -3.689415000 | -0.727040000 |
| H  | 4.951366000  | -4.708175000 | -0.677172000 |
| C  | 5.157852000  | -2.777169000 | -1.601292000 |
| H  | 5.981470000  | -3.083423000 | -2.240978000 |
| C  | 4.684781000  | -1.472287000 | -1.659927000 |
| H  | 5.127507000  | -0.761681000 | -2.354787000 |
| C  | 3.838267000  | 1.462122000  | -1.160836000 |
| C  | 5.180649000  | 1.501271000  | -0.761533000 |
| H  | 5.645234000  | 0.614868000  | -0.335730000 |
| C  | 5.902035000  | 2.683100000  | -0.869014000 |
| H  | 6.938987000  | 2.715074000  | -0.545264000 |
| C  | 5.293285000  | 3.826890000  | -1.377707000 |
| H  | 5.861610000  | 4.750379000  | -1.460034000 |
| C  | 3.955794000  | 3.797922000  | -1.771257000 |
| H  | 3.476937000  | 4.693936000  | -2.158498000 |
| C  | 3.229629000  | 2.624278000  | -1.656576000 |
| H  | 2.181583000  | 2.589825000  | -1.947741000 |
| C  | -1.493921000 | -4.412876000 | -2.281851000 |
| H  | -1.068794000 | -4.716049000 | -1.317396000 |
| H  | -0.941716000 | -4.930856000 | -3.076639000 |
| H  | -2.532550000 | -4.760094000 | -2.315198000 |
| C  | 0.499610000  | -2.175749000 | -2.711092000 |

|   |              |              |              |
|---|--------------|--------------|--------------|
| H | 0.729547000  | -1.120096000 | -2.913235000 |
| H | 0.881578000  | -2.749048000 | -3.565567000 |
| H | 1.080759000  | -2.497303000 | -1.834847000 |
| C | -2.174319000 | -2.119447000 | -4.185485000 |
| H | -3.251411000 | -2.327756000 | -4.174286000 |
| H | -1.729755000 | -2.715611000 | -4.992432000 |
| H | -2.043397000 | -1.059230000 | -4.435391000 |
| C | -4.609625000 | -3.150937000 | -1.159983000 |
| H | -4.632184000 | -3.410222000 | -2.225242000 |
| H | -5.648637000 | -3.066258000 | -0.817745000 |
| H | -4.142027000 | -3.981823000 | -0.616641000 |
| C | -3.852986000 | -1.234384000 | 1.056234000  |
| H | -3.432294000 | -2.081795000 | 1.613960000  |
| H | -4.908344000 | -1.138862000 | 1.342369000  |
| H | -3.360151000 | -0.314312000 | 1.403940000  |
| C | -4.566564000 | -0.112510000 | -1.717002000 |
| H | -4.085345000 | 0.836664000  | -1.443380000 |
| H | -5.627726000 | -0.046965000 | -1.445692000 |
| H | -4.495040000 | -0.231971000 | -2.805384000 |
| C | -0.832304000 | 1.735897000  | -2.770000000 |
| H | 0.206829000  | 1.409105000  | -2.612147000 |
| H | -0.835182000 | 2.261900000  | -3.733007000 |
| H | -1.471692000 | 0.848168000  | -2.893582000 |
| C | -3.065243000 | 3.713037000  | -2.197725000 |
| H | -3.809162000 | 2.948268000  | -2.451817000 |
| H | -2.800898000 | 4.248233000  | -3.118691000 |
| H | -3.539140000 | 4.433815000  | -1.520609000 |
| C | -0.205714000 | 4.307653000  | -1.258935000 |
| H | -0.611544000 | 5.184763000  | -0.741841000 |
| H | 0.160972000  | 4.635930000  | -2.241329000 |
| H | 0.648269000  | 3.947462000  | -0.668546000 |
| C | -4.590552000 | 2.525828000  | 1.036653000  |
| H | -4.897298000 | 3.017091000  | 0.105185000  |
| H | -5.149264000 | 2.986811000  | 1.861290000  |
| H | -4.891942000 | 1.473540000  | 0.970929000  |
| C | -2.392601000 | 4.555347000  | 1.612340000  |
| H | -1.326785000 | 4.741514000  | 1.795909000  |
| H | -2.951221000 | 4.904656000  | 2.489952000  |
| H | -2.702191000 | 5.171573000  | 0.759025000  |
| C | -2.307713000 | 1.853597000  | 2.981258000  |
| H | -2.096950000 | 0.778075000  | 2.898166000  |
| H | -3.142071000 | 1.971398000  | 3.683975000  |
| H | -1.423667000 | 2.320662000  | 3.434187000  |
| C | 1.272254000  | 2.100572000  | 2.011778000  |
| H | 1.863553000  | 2.097224000  | 1.084176000  |
| H | 1.725252000  | 2.853051000  | 2.670537000  |

|   |              |              |             |
|---|--------------|--------------|-------------|
| H | 0.261923000  | 2.449412000  | 1.761235000 |
| C | 0.830092000  | 0.658064000  | 4.708592000 |
| H | -0.235095000 | 0.896840000  | 4.803801000 |
| H | 1.406106000  | 1.479369000  | 5.153803000 |
| H | 1.027917000  | -0.241704000 | 5.304706000 |
| C | 3.199855000  | -0.001390000 | 2.937782000 |
| H | 3.406948000  | -0.965314000 | 3.416645000 |
| H | 3.728966000  | 0.776486000  | 3.503878000 |
| H | 3.635811000  | -0.029070000 | 1.930140000 |
| C | -1.381887000 | -2.270564000 | 4.019843000 |
| H | -1.110369000 | -1.641549000 | 4.876132000 |
| H | -1.606938000 | -3.276498000 | 4.396171000 |
| H | -2.301234000 | -1.858208000 | 3.585907000 |
| C | 1.517670000  | -3.112243000 | 3.618340000 |
| H | 2.390149000  | -3.177174000 | 2.955504000 |
| H | 1.263060000  | -4.129971000 | 3.940641000 |
| H | 1.820288000  | -2.551368000 | 4.511108000 |
| C | -0.475064000 | -3.538172000 | 1.368444000 |
| H | -1.341197000 | -3.201207000 | 0.780834000 |
| H | -0.720638000 | -4.516119000 | 1.802286000 |
| H | 0.353826000  | -3.691240000 | 0.660888000 |

**Precatalyst La[N(TMS)<sub>2</sub>]<sub>3</sub>**

|    |              |              |              |
|----|--------------|--------------|--------------|
| La | -0.000115000 | 0.000539000  | -0.514255000 |
| N  | 2.136038000  | 0.834770000  | 0.040670000  |
| N  | -0.344546000 | -2.266572000 | 0.040469000  |
| N  | -1.791525000 | 1.431857000  | 0.040448000  |
| Si | -1.795844000 | 2.845805000  | -0.973264000 |
| Si | 0.603775000  | -3.155403000 | 1.211356000  |
| Si | 3.361738000  | 0.132262000  | -0.974571000 |
| Si | 2.431952000  | 2.099833000  | 1.211986000  |
| Si | -3.035363000 | 1.053991000  | 1.211117000  |
| Si | -1.566494000 | -2.977004000 | -0.974006000 |
| C  | 2.603717000  | 3.801303000  | 0.389333000  |
| H  | 2.651406000  | 4.602154000  | 1.137682000  |
| H  | 3.513734000  | 3.855974000  | -0.220427000 |
| H  | 1.750708000  | 4.008247000  | -0.270310000 |
| C  | 0.948086000  | 2.151749000  | 2.394422000  |
| H  | 0.887185000  | 1.221539000  | 2.976712000  |
| H  | 1.046212000  | 2.980179000  | 3.106854000  |
| H  | -0.004834000 | 2.286294000  | 1.859999000  |
| C  | 3.994937000  | 1.785167000  | 2.235817000  |
| H  | 3.950848000  | 0.802752000  | 2.721940000  |
| H  | 4.899136000  | 1.815122000  | 1.614416000  |
| H  | 4.106585000  | 2.546146000  | 3.017742000  |
| C  | 4.362620000  | 1.413050000  | -1.944598000 |

|   |              |              |              |
|---|--------------|--------------|--------------|
| H | 4.986748000  | 2.021787000  | -1.278810000 |
| H | 5.026333000  | 0.930178000  | -2.672242000 |
| H | 3.692241000  | 2.091931000  | -2.487062000 |
| C | 4.555318000  | -1.034935000 | -0.084325000 |
| H | 5.236681000  | -0.478687000 | 0.570042000  |
| H | 4.010297000  | -1.753683000 | 0.540452000  |
| H | 5.163843000  | -1.599045000 | -0.802153000 |
| C | 2.439942000  | -0.923738000 | -2.298756000 |
| H | 3.187864000  | -1.363978000 | -2.969610000 |
| H | 1.871934000  | -1.777430000 | -1.891853000 |
| H | 1.787504000  | -0.321902000 | -2.956021000 |
| C | -2.021542000 | -1.650686000 | -2.297453000 |
| H | -1.174454000 | -1.386607000 | -2.955099000 |
| H | -2.777541000 | -2.078056000 | -2.967593000 |
| H | -2.476023000 | -0.731699000 | -1.890143000 |
| C | -0.958121000 | -4.484132000 | -1.944564000 |
| H | -0.035973000 | -4.242587000 | -2.488528000 |
| H | -0.741167000 | -5.328508000 | -1.278687000 |
| H | -1.708971000 | -4.818336000 | -2.670966000 |
| C | -3.173042000 | -3.427747000 | -0.082037000 |
| H | -3.966000000 | -3.674935000 | -0.798894000 |
| H | -3.030063000 | -4.294749000 | 0.573473000  |
| H | -3.523814000 | -2.595872000 | 0.541781000  |
| C | 1.991005000  | -4.154016000 | 0.387090000  |
| H | 2.596827000  | -3.518057000 | -0.271749000 |
| H | 2.660728000  | -4.597324000 | 1.134512000  |
| H | 1.582328000  | -4.967974000 | -0.223879000 |
| C | -0.448692000 | -4.352579000 | 2.235706000  |
| H | -0.872957000 | -5.152302000 | 1.615217000  |
| H | 0.155148000  | -4.827812000 | 3.018327000  |
| H | -1.278431000 | -3.824163000 | 2.721229000  |
| C | 1.390646000  | -1.896738000 | 2.394103000  |
| H | 2.059961000  | -2.396093000 | 3.105541000  |
| H | 1.982543000  | -1.137960000 | 1.859693000  |
| H | 0.615742000  | -1.379778000 | 2.977493000  |
| C | -2.337349000 | -0.255900000 | 2.394270000  |
| H | -1.501628000 | 0.157632000  | 2.976212000  |
| H | -3.103493000 | -0.585373000 | 3.106981000  |
| H | -1.976627000 | -1.148518000 | 1.860468000  |
| C | -4.592961000 | 0.349885000  | 0.386987000  |
| H | -4.344048000 | -0.492615000 | -0.271766000 |
| H | -5.311062000 | -0.009367000 | 1.134621000  |
| H | -5.095058000 | 1.109780000  | -0.224105000 |
| C | -3.546493000 | 2.564524000  | 2.234352000  |
| H | -4.262065000 | 2.280664000  | 3.015567000  |
| H | -2.674263000 | 3.017804000  | 2.721320000  |

|   |              |             |              |
|---|--------------|-------------|--------------|
| H | -4.024083000 | 3.332355000 | 1.612335000  |
| C | -3.404854000 | 3.072356000 | -1.944395000 |
| H | -3.656422000 | 2.152964000 | -2.488435000 |
| H | -4.244823000 | 3.306539000 | -1.278884000 |
| H | -3.318670000 | 3.889732000 | -2.670741000 |
| C | -1.383616000 | 4.462075000 | -0.080315000 |
| H | -2.206950000 | 4.772350000 | 0.573581000  |
| H | -0.489201000 | 4.349140000 | 0.545306000  |
| H | -1.199117000 | 5.272278000 | -0.796764000 |
| C | -0.418804000 | 2.577853000 | -2.296022000 |
| H | 0.603829000  | 2.511137000 | -1.887581000 |
| H | -0.613216000 | 1.712985000 | -2.954774000 |
| H | -0.410061000 | 3.446870000 | -2.965355000 |

### HBpin

|   |              |              |              |
|---|--------------|--------------|--------------|
| O | 1.062414000  | 1.182413000  | -0.419543000 |
| C | 0.777871000  | -0.186473000 | -0.054681000 |
| B | 0.000001000  | 1.927385000  | -0.000001000 |
| C | -0.777871000 | -0.186473000 | 0.054681000  |
| O | -1.062416000 | 1.182416000  | 0.419534000  |
| H | -0.000001000 | 3.113173000  | -0.000014000 |
| C | 1.473588000  | -0.433207000 | 1.275783000  |
| H | 2.536552000  | -0.194343000 | 1.164338000  |
| H | 1.065196000  | 0.207304000  | 2.065878000  |
| H | 1.386828000  | -1.478933000 | 1.592510000  |
| C | 1.347049000  | -1.104827000 | -1.115767000 |
| H | 1.089520000  | -2.150124000 | -0.902173000 |
| H | 0.982368000  | -0.850272000 | -2.114914000 |
| H | 2.439130000  | -1.020944000 | -1.124508000 |
| C | -1.347047000 | -1.104819000 | 1.115774000  |
| H | -0.982364000 | -0.850257000 | 2.114918000  |
| H | -2.439128000 | -1.020938000 | 1.124518000  |
| H | -1.089517000 | -2.150117000 | 0.902187000  |
| C | -1.473590000 | -0.433217000 | -1.275781000 |
| H | -2.536550000 | -0.194336000 | -1.164344000 |
| H | -1.065184000 | 0.207274000  | -2.065885000 |
| H | -1.386844000 | -1.478950000 | -1.592490000 |

### dicyclohexylketone

|   |             |              |              |
|---|-------------|--------------|--------------|
| O | 0.338059000 | 0.000494000  | 2.345752000  |
| C | 0.007645000 | 0.000214000  | 1.175476000  |
| C | 1.937090000 | -1.257748000 | 0.214533000  |
| C | 1.069695000 | 0.000018000  | 0.089329000  |
| C | 1.937107000 | 1.257815000  | 0.214103000  |
| C | 3.068264000 | 1.255884000  | -0.805852000 |
| C | 3.922871000 | -0.000130000 | -0.677717000 |

|   |              |              |              |
|---|--------------|--------------|--------------|
| C | 3.068249000  | -1.256177000 | -0.805422000 |
| H | 1.315542000  | -2.158092000 | 0.102976000  |
| H | 2.345249000  | -1.281695000 | 1.236096000  |
| H | 0.596961000  | -0.000150000 | -0.907412000 |
| H | 1.315566000  | 2.158127000  | 0.102242000  |
| H | 2.345266000  | 1.282105000  | 1.235657000  |
| H | 3.684531000  | 2.156473000  | -0.687644000 |
| H | 2.642205000  | 1.301121000  | -1.821594000 |
| H | 4.722509000  | -0.000265000 | -1.429565000 |
| H | 4.416964000  | 0.000036000  | 0.307075000  |
| H | 3.684504000  | -2.156734000 | -0.686905000 |
| H | 2.642188000  | -1.301757000 | -1.821147000 |
| C | -1.820353000 | 1.261065000  | -0.020076000 |
| C | -3.299180000 | 1.256520000  | -0.391853000 |
| C | -3.666200000 | -0.000186000 | -1.173041000 |
| C | -3.299157000 | -1.256673000 | -0.391511000 |
| C | -1.820327000 | -1.261096000 | -0.019741000 |
| C | -1.449993000 | 0.000089000  | 0.770583000  |
| H | -1.570548000 | 2.156326000  | 0.565761000  |
| H | -1.217980000 | 1.308332000  | -0.942422000 |
| H | -3.546480000 | 2.156904000  | -0.968529000 |
| H | -3.901753000 | 1.299216000  | 0.529330000  |
| H | -4.735301000 | -0.000230000 | -1.420708000 |
| H | -3.122956000 | -0.000312000 | -2.132202000 |
| H | -3.546447000 | -2.157219000 | -0.967940000 |
| H | -3.901725000 | -1.299126000 | 0.529687000  |
| H | -1.570507000 | -2.156203000 | 0.566325000  |
| H | -1.217961000 | -1.308599000 | -0.942080000 |
| H | -2.018562000 | 0.000214000  | 1.714121000  |

### Intermediate A

|    |              |              |              |
|----|--------------|--------------|--------------|
| La | -0.720192000 | -0.054169000 | 0.013506000  |
| N  | -0.650684000 | -1.775274000 | -1.656135000 |
| N  | -1.831689000 | 1.980386000  | -0.585083000 |
| N  | -1.391915000 | -0.786575000 | 2.194705000  |
| Si | -0.205507000 | -1.272733000 | 3.372060000  |
| Si | -3.080414000 | 2.212120000  | -1.792332000 |
| Si | 0.165185000  | -1.326783000 | -3.136567000 |
| Si | -1.435183000 | -3.343988000 | -1.554765000 |
| Si | -3.115099000 | -0.740515000 | 2.463684000  |
| Si | -1.246093000 | 3.367514000  | 0.305763000  |
| C  | -0.467135000 | -4.735811000 | -2.414672000 |
| H  | -0.968701000 | -5.693807000 | -2.227088000 |
| H  | -0.403502000 | -4.605280000 | -3.501702000 |
| H  | 0.553334000  | -4.808779000 | -2.018654000 |
| C  | -1.609439000 | -3.896370000 | 0.253049000  |



|   |              |              |              |
|---|--------------|--------------|--------------|
| H | -1.815397000 | -3.073028000 | 0.950105000  |
| H | -2.419035000 | -4.632022000 | 0.345389000  |
| H | -0.680931000 | -4.376958000 | 0.586480000  |
| C | -3.163637000 | -3.326096000 | -2.342643000 |
| H | -3.835355000 | -2.617749000 | -1.841754000 |
| H | -3.112107000 | -3.038476000 | -3.399838000 |
| H | -3.622072000 | -4.321518000 | -2.283766000 |
| C | 1.818368000  | -2.238273000 | -3.384216000 |
| H | 1.673597000  | -3.258874000 | -3.755674000 |
| H | 2.454308000  | -1.704530000 | -4.103203000 |
| H | 2.358387000  | -2.308493000 | -2.431066000 |
| C | -0.820446000 | -1.607407000 | -4.733330000 |
| H | -1.005129000 | -2.676077000 | -4.899219000 |
| H | -1.790182000 | -1.098528000 | -4.723139000 |
| H | -0.247632000 | -1.236693000 | -5.593126000 |
| C | 0.657515000  | 0.521052000  | -3.051839000 |
| H | 0.970881000  | 0.838619000  | -4.054734000 |
| H | -0.139173000 | 1.212034000  | -2.736510000 |
| H | 1.523176000  | 0.678679000  | -2.392247000 |
| C | -0.428749000 | 2.780574000  | 1.922531000  |
| H | -1.119560000 | 2.202943000  | 2.551302000  |
| H | 0.476114000  | 2.176375000  | 1.770876000  |
| H | -0.111804000 | 3.662235000  | 2.495388000  |
| C | 0.105016000  | 4.309247000  | -0.645341000 |
| H | 0.902681000  | 3.614175000  | -0.945082000 |
| H | -0.286151000 | 4.774411000  | -1.557509000 |
| H | 0.552860000  | 5.096554000  | -0.024214000 |
| C | -2.571241000 | 4.620726000  | 0.824196000  |
| H | -2.109024000 | 5.410564000  | 1.429990000  |
| H | -3.056042000 | 5.102420000  | -0.033059000 |
| H | -3.350666000 | 4.143511000  | 1.430402000  |
| C | -2.714294000 | 3.656845000  | -2.971043000 |
| H | -1.746703000 | 3.514457000  | -3.469203000 |
| H | -3.487432000 | 3.715591000  | -3.747482000 |
| H | -2.689265000 | 4.624822000  | -2.455684000 |
| C | -4.788398000 | 2.533529000  | -1.026089000 |
| H | -4.833003000 | 3.518728000  | -0.547880000 |
| H | -5.567764000 | 2.499601000  | -1.797818000 |
| H | -5.033064000 | 1.783475000  | -0.263980000 |
| C | -3.208118000 | 0.677541000  | -2.900537000 |
| H | -4.124766000 | 0.727996000  | -3.501576000 |
| H | -2.359403000 | 0.646508000  | -3.595379000 |
| H | -3.222005000 | -0.276400000 | -2.356809000 |
| C | -3.952271000 | -0.841527000 | 0.752077000  |
| H | -3.769985000 | -1.810317000 | 0.267385000  |
| H | -5.038769000 | -0.739086000 | 0.870010000  |

|   |              |              |              |
|---|--------------|--------------|--------------|
| H | -3.656994000 | -0.031106000 | 0.068723000  |
| C | -3.699895000 | 0.880261000  | 3.253556000  |
| H | -3.510598000 | 1.719313000  | 2.569435000  |
| H | -4.775388000 | 0.857064000  | 3.468393000  |
| H | -3.168483000 | 1.083384000  | 4.192235000  |
| C | -3.821678000 | -2.194696000 | 3.454883000  |
| H | -3.636489000 | -2.100963000 | 4.530209000  |
| H | -4.907695000 | -2.244229000 | 3.305543000  |
| H | -3.391776000 | -3.145768000 | 3.115062000  |
| C | -0.877867000 | -1.770231000 | 5.072345000  |
| H | -1.508995000 | -0.985041000 | 5.506940000  |
| H | -1.463919000 | -2.694496000 | 5.028951000  |
| H | -0.036482000 | -1.936658000 | 5.756906000  |
| C | 0.792462000  | -2.752795000 | 2.707219000  |
| H | 0.158226000  | -3.645935000 | 2.655419000  |
| H | 1.165736000  | -2.566716000 | 1.687331000  |
| H | 1.654985000  | -2.978875000 | 3.348734000  |
| C | 1.074546000  | 0.097496000  | 3.718745000  |
| H | 1.582859000  | 0.442881000  | 2.808188000  |
| H | 0.600492000  | 0.973273000  | 4.178269000  |
| H | 1.842799000  | -0.277551000 | 4.408646000  |
| O | 1.737045000  | 0.631994000  | 0.198068000  |
| C | 2.950488000  | 0.404879000  | 0.153793000  |
| C | 3.535743000  | 2.561337000  | 1.302008000  |
| C | 3.907757000  | 1.559230000  | 0.204313000  |
| C | 3.918300000  | 2.258343000  | -1.169819000 |
| C | 4.884428000  | 3.436848000  | -1.159829000 |
| C | 4.544994000  | 4.424143000  | -0.049202000 |
| C | 4.509773000  | 3.732381000  | 1.309147000  |
| H | 3.514246000  | 2.058785000  | 2.280219000  |
| H | 2.515429000  | 2.927895000  | 1.111785000  |
| H | 4.922962000  | 1.177004000  | 0.398356000  |
| H | 4.181804000  | 1.547220000  | -1.965284000 |
| H | 2.895824000  | 2.610479000  | -1.381657000 |
| H | 4.869528000  | 3.933316000  | -2.137826000 |
| H | 5.910022000  | 3.060462000  | -1.015276000 |
| H | 5.266359000  | 5.250549000  | -0.040799000 |
| H | 3.558730000  | 4.869990000  | -0.253411000 |
| H | 4.231082000  | 4.442570000  | 2.097075000  |
| H | 5.519211000  | 3.368247000  | 1.560485000  |
| C | 4.538216000  | -1.238960000 | -0.971027000 |
| C | 5.000389000  | -2.692068000 | -0.948111000 |
| C | 5.498525000  | -3.092169000 | 0.435755000  |
| C | 4.425645000  | -2.853924000 | 1.491281000  |
| C | 3.954846000  | -1.404279000 | 1.487829000  |
| C | 3.452072000  | -1.004659000 | 0.084813000  |

|   |             |              |              |
|---|-------------|--------------|--------------|
| H | 4.157919000 | -0.974752000 | -1.968059000 |
| H | 5.401158000 | -0.584243000 | -0.770284000 |
| H | 5.782214000 | -2.842719000 | -1.702302000 |
| H | 4.160030000 | -3.343171000 | -1.237146000 |
| H | 5.811951000 | -4.143143000 | 0.440197000  |
| H | 6.392418000 | -2.497709000 | 0.685597000  |
| H | 4.793708000 | -3.117546000 | 2.490698000  |
| H | 3.562909000 | -3.509465000 | 1.293587000  |
| H | 3.154839000 | -1.255538000 | 2.227254000  |
| H | 4.789539000 | -0.744298000 | 1.776505000  |
| H | 2.577796000 | -1.637305000 | -0.156285000 |

**TSI between A and B**

|    |              |              |              |
|----|--------------|--------------|--------------|
| La | -0.711216000 | -0.229027000 | -0.044125000 |
| N  | -0.855048000 | 1.176940000  | 2.049424000  |
| N  | -1.165681000 | -2.595481000 | 0.132383000  |
| N  | -2.281991000 | 0.335248000  | -1.747306000 |
| Si | -1.842239000 | 1.143543000  | -3.234744000 |
| Si | -2.017267000 | -3.463461000 | 1.400434000  |
| Si | -0.026714000 | 0.504782000  | 3.481840000  |
| Si | -2.265396000 | 2.216427000  | 2.382603000  |
| Si | -3.920720000 | -0.286099000 | -1.606180000 |
| Si | -0.495529000 | -3.572669000 | -1.163927000 |
| C  | -1.746972000 | 3.767196000  | 3.349617000  |
| H  | -2.538029000 | 4.527025000  | 3.325677000  |
| H  | -1.564718000 | 3.514783000  | 4.402343000  |
| H  | -0.819777000 | 4.196658000  | 2.954655000  |
| C  | -3.180460000 | 2.728662000  | 0.782472000  |
| H  | -2.773827000 | 2.289158000  | -0.138759000 |
| H  | -4.226724000 | 2.407848000  | 0.854843000  |
| H  | -3.192805000 | 3.817319000  | 0.660046000  |
| C  | -3.647871000 | 1.416442000  | 3.420567000  |
| H  | -3.940610000 | 0.427123000  | 3.046368000  |
| H  | -3.394435000 | 1.315743000  | 4.479302000  |
| H  | -4.528998000 | 2.068351000  | 3.350403000  |
| C  | 1.333384000  | 1.592239000  | 4.242674000  |
| H  | 0.949916000  | 2.580691000  | 4.519530000  |
| H  | 1.683812000  | 1.095279000  | 5.157396000  |
| H  | 2.191487000  | 1.751583000  | 3.583692000  |
| C  | -1.104361000 | 0.124489000  | 5.001383000  |
| H  | -1.395982000 | 1.046793000  | 5.518581000  |
| H  | -2.004208000 | -0.460694000 | 4.798370000  |
| H  | -0.477634000 | -0.448835000 | 5.698317000  |
| C  | 0.866077000  | -1.113164000 | 2.993278000  |
| H  | 1.119742000  | -1.665489000 | 3.908282000  |
| H  | 0.295046000  | -1.804550000 | 2.356487000  |

|   |              |              |              |
|---|--------------|--------------|--------------|
| H | 1.807305000  | -0.878206000 | 2.482628000  |
| C | -0.154331000 | -2.489680000 | -2.690095000 |
| H | -1.048364000 | -1.928404000 | -2.991087000 |
| H | 0.672015000  | -1.783219000 | -2.543334000 |
| H | 0.133362000  | -3.142024000 | -3.524724000 |
| C | 1.164279000  | -4.377478000 | -0.681547000 |
| H | 1.705864000  | -3.729896000 | 0.017937000  |
| H | 1.016601000  | -5.344113000 | -0.185584000 |
| H | 1.791675000  | -4.546012000 | -1.567996000 |
| C | -1.567526000 | -5.006784000 | -1.799693000 |
| H | -1.037802000 | -5.479458000 | -2.637540000 |
| H | -1.728943000 | -5.779356000 | -1.038854000 |
| H | -2.546702000 | -4.678266000 | -2.165986000 |
| C | -0.987098000 | -4.883699000 | 2.135113000  |
| H | -0.006553000 | -4.522137000 | 2.471585000  |
| H | -1.506197000 | -5.311913000 | 3.002069000  |
| H | -0.817667000 | -5.695993000 | 1.417848000  |
| C | -3.669418000 | -4.224300000 | 0.850607000  |
| H | -3.537705000 | -5.030434000 | 0.121740000  |
| H | -4.181838000 | -4.644721000 | 1.725847000  |
| H | -4.330718000 | -3.473423000 | 0.402118000  |
| C | -2.419376000 | -2.301258000 | 2.855119000  |
| H | -3.450563000 | -2.458013000 | 3.197515000  |
| H | -1.751311000 | -2.501380000 | 3.701935000  |
| H | -2.326131000 | -1.234295000 | 2.614415000  |
| C | -4.364376000 | -0.589662000 | 0.215592000  |
| H | -4.430892000 | 0.336788000  | 0.795132000  |
| H | -5.347415000 | -1.077105000 | 0.261335000  |
| H | -3.663577000 | -1.268777000 | 0.716009000  |
| C | -4.150246000 | -1.956472000 | -2.473895000 |
| H | -3.462729000 | -2.690146000 | -2.033820000 |
| H | -5.174031000 | -2.326772000 | -2.333653000 |
| H | -3.951448000 | -1.900623000 | -3.550240000 |
| C | -5.238956000 | 0.909228000  | -2.267666000 |
| H | -5.142724000 | 1.095835000  | -3.343823000 |
| H | -6.235088000 | 0.481816000  | -2.095515000 |
| H | -5.192965000 | 1.875698000  | -1.751565000 |
| C | -2.405165000 | 0.256107000  | -4.820045000 |
| H | -1.994913000 | -0.758877000 | -4.885949000 |
| H | -3.496423000 | 0.187449000  | -4.902884000 |
| H | -2.045018000 | 0.820034000  | -5.690746000 |
| C | -2.530386000 | 2.918710000  | -3.374186000 |
| H | -3.409556000 | 2.938567000  | -4.029816000 |
| H | -2.846535000 | 3.308299000  | -2.399772000 |
| H | -1.789426000 | 3.610342000  | -3.795890000 |
| C | 0.056924000  | 1.188390000  | -3.385291000 |

|   |             |              |              |
|---|-------------|--------------|--------------|
| H | 0.573805000 | 1.493796000  | -2.465844000 |
| H | 0.417592000 | 0.194671000  | -3.681695000 |
| H | 0.352852000 | 1.892084000  | -4.175174000 |
| O | 1.773190000 | -0.749688000 | -0.613159000 |
| C | 2.984380000 | -0.976598000 | -0.574944000 |
| C | 3.856127000 | 1.166327000  | -1.444233000 |
| C | 3.879824000 | -0.359665000 | -1.613973000 |
| C | 3.430993000 | -0.761030000 | -3.024068000 |
| C | 4.275110000 | -0.066412000 | -4.084256000 |
| C | 4.220530000 | 1.448364000  | -3.914772000 |
| C | 4.684764000 | 1.853853000  | -2.520850000 |
| H | 4.226517000 | 1.430421000  | -0.442699000 |
| H | 2.807982000 | 1.501775000  | -1.491277000 |
| H | 4.913601000 | -0.707286000 | -1.460299000 |
| H | 3.468934000 | -1.855426000 | -3.133611000 |
| H | 2.379394000 | -0.464567000 | -3.145918000 |
| H | 3.927832000 | -0.356715000 | -5.083400000 |
| H | 5.320913000 | -0.405165000 | -4.005240000 |
| H | 4.829490000 | 1.943358000  | -4.681299000 |
| H | 3.182830000 | 1.790534000  | -4.063618000 |
| H | 4.629581000 | 2.943911000  | -2.391095000 |
| H | 5.745150000 | 1.581140000  | -2.395558000 |
| C | 4.453188000 | -2.960299000 | 0.014040000  |
| C | 4.937152000 | -3.796968000 | 1.192872000  |
| C | 5.710373000 | -2.940833000 | 2.190376000  |
| C | 4.882426000 | -1.750687000 | 2.663346000  |
| C | 4.380052000 | -0.917974000 | 1.488348000  |
| C | 3.576432000 | -1.808326000 | 0.522106000  |
| H | 3.892012000 | -3.580531000 | -0.697287000 |
| H | 5.325006000 | -2.557511000 | -0.524829000 |
| H | 5.558150000 | -4.626487000 | 0.833226000  |
| H | 4.065053000 | -4.251554000 | 1.689837000  |
| H | 6.031070000 | -3.545439000 | 3.047620000  |
| H | 6.629898000 | -2.571172000 | 1.708017000  |
| H | 5.466301000 | -1.118495000 | 3.343540000  |
| H | 4.015071000 | -2.111805000 | 3.238285000  |
| H | 3.760235000 | -0.079830000 | 1.841924000  |
| H | 5.237982000 | -0.478476000 | 0.953421000  |
| H | 2.726668000 | -2.231780000 | 1.082032000  |
| O | 1.262781000 | 3.337337000  | 1.780830000  |
| C | 1.561801000 | 4.324117000  | 0.785030000  |
| C | 0.709578000 | 3.860306000  | -0.436906000 |
| O | 0.646336000 | 2.420949000  | -0.237219000 |
| C | 3.063583000 | 4.261497000  | 0.529883000  |
| H | 3.584597000 | 4.417863000  | 1.480402000  |
| H | 3.359477000 | 3.280751000  | 0.141702000  |

|   |              |             |              |
|---|--------------|-------------|--------------|
| C | 1.207802000  | 5.698410000 | 1.319651000  |
| H | 1.388095000  | 6.468228000 | 0.558337000  |
| H | 0.164759000  | 5.763323000 | 1.640548000  |
| H | 1.840893000  | 5.923381000 | 2.184833000  |
| C | -0.694744000 | 4.421050000 | -0.408619000 |
| H | -1.308855000 | 3.886973000 | -1.140970000 |
| H | -1.150904000 | 4.301930000 | 0.577426000  |
| H | -0.699637000 | 5.485960000 | -0.670056000 |
| B | 0.959409000  | 2.166044000 | 1.110106000  |
| H | 1.531140000  | 1.127517000 | 1.330065000  |
| H | 0.651926000  | 3.843078000 | -2.589340000 |
| C | 1.335512000  | 4.147447000 | -1.788079000 |
| H | 2.284072000  | 3.618979000 | -1.930098000 |
| H | 1.518497000  | 5.224410000 | -1.895104000 |
| H | 3.395096000  | 5.032127000 | -0.176288000 |

### Intermediate B

|    |              |              |              |
|----|--------------|--------------|--------------|
| La | -0.715480000 | -0.192537000 | 0.025352000  |
| N  | -0.854042000 | 2.489027000  | 0.552779000  |
| N  | -1.427677000 | -1.734321000 | 1.752741000  |
| N  | -2.034443000 | -1.003877000 | -1.761519000 |
| Si | -1.341952000 | -1.444759000 | -3.306875000 |
| Si | -2.489813000 | -1.433023000 | 3.118881000  |
| Si | -0.294274000 | 2.866347000  | 2.238960000  |
| Si | -2.228878000 | 3.436013000  | -0.149452000 |
| Si | -3.746669000 | -1.277392000 | -1.493328000 |
| Si | -0.783907000 | -3.364951000 | 1.608247000  |
| C  | -1.718054000 | 5.240569000  | -0.393160000 |
| H  | -2.449243000 | 5.774552000  | -1.012067000 |
| H  | -1.654695000 | 5.760936000  | 0.570969000  |
| H  | -0.730339000 | 5.297203000  | -0.862902000 |
| C  | -2.807900000 | 2.680171000  | -1.796641000 |
| H  | -2.483598000 | 1.643477000  | -1.961251000 |
| H  | -3.904858000 | 2.697750000  | -1.828090000 |
| H  | -2.446999000 | 3.264824000  | -2.647383000 |
| C  | -3.774526000 | 3.435121000  | 0.952446000  |
| H  | -4.031389000 | 2.443408000  | 1.343167000  |
| H  | -3.701455000 | 4.125782000  | 1.796524000  |
| H  | -4.615289000 | 3.765382000  | 0.328418000  |
| C  | 1.193888000  | 4.031459000  | 2.322485000  |
| H  | 0.993914000  | 4.987857000  | 1.828645000  |
| H  | 1.416533000  | 4.221683000  | 3.381572000  |
| H  | 2.078467000  | 3.598156000  | 1.843846000  |
| C  | -1.594524000 | 3.696550000  | 3.334429000  |
| H  | -1.817615000 | 4.715079000  | 2.995754000  |
| H  | -2.532802000 | 3.145043000  | 3.431193000  |

|   |              |              |              |
|---|--------------|--------------|--------------|
| H | -1.148856000 | 3.781229000  | 4.334766000  |
| C | 0.300090000  | 1.277352000  | 3.106602000  |
| H | 0.304732000  | 1.454538000  | 4.191114000  |
| H | -0.291839000 | 0.367707000  | 2.944438000  |
| H | 1.330592000  | 1.061915000  | 2.806656000  |
| C | -0.417950000 | -3.771102000 | -0.210443000 |
| H | -1.337500000 | -3.787065000 | -0.807378000 |
| H | 0.278372000  | -3.064817000 | -0.676788000 |
| H | 0.055048000  | -4.761176000 | -0.266319000 |
| C | 0.858288000  | -3.577762000 | 2.544077000  |
| H | 1.634943000  | -2.944054000 | 2.098739000  |
| H | 0.762416000  | -3.300124000 | 3.600903000  |
| H | 1.202606000  | -4.619361000 | 2.493135000  |
| C | -1.904624000 | -4.778294000 | 2.203225000  |
| H | -1.389016000 | -5.725179000 | 1.995413000  |
| H | -2.109006000 | -4.745728000 | 3.279547000  |
| H | -2.862986000 | -4.798359000 | 1.671348000  |
| C | -1.674964000 | -1.864983000 | 4.781133000  |
| H | -0.728135000 | -1.322894000 | 4.903134000  |
| H | -2.335216000 | -1.586299000 | 5.612197000  |
| H | -1.461905000 | -2.937112000 | 4.873014000  |
| C | -4.149933000 | -2.355752000 | 3.062130000  |
| H | -4.045258000 | -3.434594000 | 3.212710000  |
| H | -4.798251000 | -1.968766000 | 3.859344000  |
| H | -4.664758000 | -2.197272000 | 2.106284000  |
| C | -2.957272000 | 0.417859000  | 3.220213000  |
| H | -4.047756000 | 0.536149000  | 3.261294000  |
| H | -2.536995000 | 0.868535000  | 4.128074000  |
| H | -2.608581000 | 1.022861000  | 2.373588000  |
| C | -4.355899000 | -0.154394000 | -0.086864000 |
| H | -4.311855000 | 0.905416000  | -0.365299000 |
| H | -5.404581000 | -0.390914000 | 0.136766000  |
| H | -3.805332000 | -0.301254000 | 0.850552000  |
| C | -4.150504000 | -3.058250000 | -0.982475000 |
| H | -3.600256000 | -3.321141000 | -0.069419000 |
| H | -5.222730000 | -3.165233000 | -0.773050000 |
| H | -3.884044000 | -3.780312000 | -1.763437000 |
| C | -4.828462000 | -0.830089000 | -2.987347000 |
| H | -4.642679000 | -1.467885000 | -3.859412000 |
| H | -5.886625000 | -0.940201000 | -2.717706000 |
| H | -4.663755000 | 0.212110000  | -3.287795000 |
| C | -1.935569000 | -3.120481000 | -3.976165000 |
| H | -1.693985000 | -3.930747000 | -3.277130000 |
| H | -3.014659000 | -3.147953000 | -4.167674000 |
| H | -1.426769000 | -3.333581000 | -4.925248000 |
| C | -1.672763000 | -0.153645000 | -4.654875000 |

|   |              |              |              |
|---|--------------|--------------|--------------|
| H | -2.730529000 | -0.141002000 | -4.941962000 |
| H | -1.416138000 | 0.849293000  | -4.293439000 |
| H | -1.080008000 | -0.359787000 | -5.555503000 |
| C | 0.546295000  | -1.646164000 | -3.132957000 |
| H | 1.020401000  | -0.868319000 | -2.519427000 |
| H | 0.787472000  | -2.626416000 | -2.702353000 |
| H | 1.018337000  | -1.593346000 | -4.123394000 |
| O | 1.730140000  | -1.069900000 | 0.084021000  |
| C | 2.946762000  | -1.032850000 | 0.295507000  |
| C | 4.196336000  | -1.405268000 | -1.799147000 |
| C | 3.853955000  | -1.998078000 | -0.414570000 |
| C | 3.255139000  | -3.394827000 | -0.579030000 |
| C | 4.223087000  | -4.306642000 | -1.322665000 |
| C | 4.582770000  | -3.726742000 | -2.686136000 |
| C | 5.155702000  | -2.321001000 | -2.549509000 |
| H | 4.618533000  | -0.395102000 | -1.701271000 |
| H | 3.256158000  | -1.306221000 | -2.365542000 |
| H | 4.793513000  | -2.080997000 | 0.155509000  |
| H | 2.991121000  | -3.813879000 | 0.402667000  |
| H | 2.317619000  | -3.315285000 | -1.146975000 |
| H | 3.783823000  | -5.305698000 | -1.432313000 |
| H | 5.141139000  | -4.433818000 | -0.726045000 |
| H | 5.292933000  | -4.379870000 | -3.208348000 |
| H | 3.675387000  | -3.685160000 | -3.310210000 |
| H | 5.377260000  | -1.894537000 | -3.535778000 |
| H | 6.112619000  | -2.365472000 | -2.004795000 |
| C | 3.436221000  | -0.703223000 | 2.679964000  |
| C | 3.937296000  | 0.246479000  | 3.763632000  |
| C | 5.334365000  | 0.771776000  | 3.461623000  |
| C | 5.373483000  | 1.432722000  | 2.090010000  |
| C | 4.932809000  | 0.456159000  | 1.005591000  |
| C | 3.513537000  | -0.046504000 | 1.282918000  |
| H | 2.400351000  | -1.007723000 | 2.888727000  |
| H | 4.045588000  | -1.623858000 | 2.680835000  |
| H | 3.911193000  | -0.263546000 | 4.734618000  |
| H | 3.244149000  | 1.099822000  | 3.840369000  |
| H | 5.652649000  | 1.475693000  | 4.240335000  |
| H | 6.053107000  | -0.063621000 | 3.480519000  |
| H | 6.379691000  | 1.807759000  | 1.866277000  |
| H | 4.703228000  | 2.308144000  | 2.084141000  |
| H | 4.982646000  | 0.938745000  | 0.020604000  |
| H | 5.640725000  | -0.387699000 | 0.986178000  |
| H | 2.826045000  | 0.816941000  | 1.278222000  |
| O | 1.139382000  | 3.651482000  | -0.587269000 |
| C | 1.951832000  | 3.401102000  | -1.714888000 |
| C | 1.030428000  | 2.504549000  | -2.602335000 |



|   |              |             |              |
|---|--------------|-------------|--------------|
| O | 0.279486000  | 1.757559000 | -1.630296000 |
| C | 3.225672000  | 2.672210000 | -1.277688000 |
| H | 3.679912000  | 3.237642000 | -0.453096000 |
| H | 3.008129000  | 1.660599000 | -0.915948000 |
| C | 2.345292000  | 4.729284000 | -2.336833000 |
| H | 2.884338000  | 4.584804000 | -3.282130000 |
| H | 1.471566000  | 5.360598000 | -2.523056000 |
| H | 3.006371000  | 5.268778000 | -1.648853000 |
| C | 0.077240000  | 3.345866000 | -3.439796000 |
| H | -0.677594000 | 2.697321000 | -3.897326000 |
| H | -0.436654000 | 4.095298000 | -2.828488000 |
| H | 0.609544000  | 3.861970000 | -4.248030000 |
| B | 0.472748000  | 2.414002000 | -0.298074000 |
| H | 1.187529000  | 1.627706000 | 0.390320000  |
| H | 1.077188000  | 0.996893000 | -4.144878000 |
| C | 1.783289000  | 1.564553000 | -3.526245000 |
| H | 2.402449000  | 0.849413000 | -2.973151000 |
| H | 2.435616000  | 2.134386000 | -4.201389000 |
| H | 3.958197000  | 2.597941000 | -2.092117000 |

#### TS2 between B and C

|    |              |              |              |
|----|--------------|--------------|--------------|
| La | -1.035804000 | -0.180845000 | -0.288590000 |
| N  | 1.846927000  | 0.537067000  | -1.935849000 |
| N  | -2.368665000 | 1.771074000  | 0.134712000  |
| N  | -2.550333000 | -1.986214000 | -0.032748000 |
| Si | -2.354658000 | -3.321510000 | 1.099077000  |
| Si | -2.480094000 | 3.127506000  | -0.963766000 |
| Si | 3.186207000  | 1.734567000  | -2.205204000 |
| Si | 1.206389000  | -0.042687000 | -3.509041000 |
| Si | -4.045495000 | -1.917283000 | -0.961629000 |
| Si | -3.227637000 | 1.856848000  | 1.663446000  |
| C  | 2.301167000  | -1.273133000 | -4.461161000 |
| H  | 1.737700000  | -2.152371000 | -4.795781000 |
| H  | 2.708975000  | -0.788539000 | -5.355743000 |
| H  | 3.143713000  | -1.602926000 | -3.847904000 |
| C  | -0.526869000 | -0.824491000 | -3.314765000 |
| H  | -0.609095000 | -1.672278000 | -2.620403000 |
| H  | -1.300700000 | -0.068392000 | -3.114920000 |
| H  | -0.803572000 | -1.232936000 | -4.295822000 |
| C  | 0.884573000  | 1.356834000  | -4.747012000 |
| H  | 0.272916000  | 2.168920000  | -4.344953000 |
| H  | 1.806934000  | 1.785346000  | -5.152243000 |
| H  | 0.340103000  | 0.911236000  | -5.590767000 |
| C  | 4.369847000  | 1.911273000  | -0.741061000 |
| H  | 4.686400000  | 0.935555000  | -0.357763000 |
| H  | 5.260187000  | 2.432006000  | -1.116934000 |

|   |              |              |              |
|---|--------------|--------------|--------------|
| H | 3.966603000  | 2.510887000  | 0.078994000  |
| C | 4.343304000  | 1.222857000  | -3.620947000 |
| H | 4.843158000  | 0.280222000  | -3.370937000 |
| H | 3.865366000  | 1.110085000  | -4.598588000 |
| H | 5.113020000  | 1.999375000  | -3.719985000 |
| C | 2.537429000  | 3.468917000  | -2.611510000 |
| H | 2.102021000  | 3.534372000  | -3.613684000 |
| H | 1.786635000  | 3.820247000  | -1.895429000 |
| H | 3.384419000  | 4.166546000  | -2.571411000 |
| C | -2.972565000 | 0.245961000  | 2.634571000  |
| H | -3.295444000 | -0.643926000 | 2.080996000  |
| H | -1.917474000 | 0.119179000  | 2.921412000  |
| H | -3.553403000 | 0.296525000  | 3.564513000  |
| C | -2.605617000 | 3.210346000  | 2.843255000  |
| H | -1.535621000 | 3.079697000  | 3.051755000  |
| H | -2.752346000 | 4.223724000  | 2.454183000  |
| H | -3.142164000 | 3.135046000  | 3.798007000  |
| C | -5.089647000 | 2.146993000  | 1.427310000  |
| H | -5.645007000 | 1.898389000  | 2.340350000  |
| H | -5.297847000 | 3.198450000  | 1.190278000  |
| H | -5.484546000 | 1.534719000  | 0.606441000  |
| C | -2.129527000 | 4.828107000  | -0.192511000 |
| H | -1.248281000 | 4.832927000  | 0.458496000  |
| H | -1.967624000 | 5.562671000  | -0.992186000 |
| H | -2.986571000 | 5.175581000  | 0.398228000  |
| C | -4.156451000 | 3.341805000  | -1.832264000 |
| H | -4.958444000 | 3.572777000  | -1.122147000 |
| H | -4.088000000 | 4.177608000  | -2.541180000 |
| H | -4.453514000 | 2.448886000  | -2.394466000 |
| C | -1.228415000 | 2.835406000  | -2.364250000 |
| H | -1.622970000 | 2.111273000  | -3.091643000 |
| H | -1.055330000 | 3.767532000  | -2.918289000 |
| H | -0.243452000 | 2.487194000  | -2.019004000 |
| C | -3.958828000 | -0.497505000 | -2.225423000 |
| H | -3.309035000 | -0.723865000 | -3.078932000 |
| H | -4.968152000 | -0.338949000 | -2.626974000 |
| H | -3.661465000 | 0.455961000  | -1.765270000 |
| C | -5.586636000 | -1.565985000 | 0.088680000  |
| H | -5.398950000 | -0.754216000 | 0.803093000  |
| H | -6.416627000 | -1.257688000 | -0.559576000 |
| H | -5.914255000 | -2.441161000 | 0.659048000  |
| C | -4.343436000 | -3.495900000 | -1.968210000 |
| H | -4.588733000 | -4.357294000 | -1.335711000 |
| H | -5.174281000 | -3.351915000 | -2.670031000 |
| H | -3.445208000 | -3.748249000 | -2.547207000 |
| C | -3.906258000 | -3.753885000 | 2.106771000  |

|   |              |              |              |
|---|--------------|--------------|--------------|
| H | -4.312021000 | -2.887004000 | 2.641199000  |
| H | -4.705472000 | -4.185271000 | 1.492578000  |
| H | -3.627069000 | -4.507716000 | 2.855010000  |
| C | -1.891298000 | -4.955957000 | 0.239942000  |
| H | -2.787958000 | -5.418907000 | -0.189687000 |
| H | -1.171661000 | -4.825117000 | -0.575742000 |
| H | -1.465452000 | -5.666414000 | 0.960497000  |
| C | -1.060134000 | -2.861206000 | 2.416041000  |
| H | -0.217166000 | -2.267022000 | 2.043098000  |
| H | -1.549042000 | -2.278237000 | 3.207179000  |
| H | -0.643903000 | -3.767626000 | 2.875518000  |
| O | 0.363440000  | 0.181691000  | 1.605036000  |
| C | 1.574222000  | 0.500679000  | 1.812394000  |
| C | 1.636236000  | -0.727898000 | 4.003379000  |
| C | 2.361437000  | -0.475633000 | 2.666721000  |
| C | 3.832548000  | -0.136534000 | 2.892678000  |
| C | 4.532450000  | -1.203345000 | 3.733780000  |
| C | 3.795841000  | -1.465438000 | 5.042211000  |
| C | 2.339579000  | -1.831619000 | 4.781398000  |
| H | 0.589980000  | -0.988743000 | 3.805240000  |
| H | 1.627149000  | 0.186812000  | 4.613978000  |
| H | 2.288789000  | -1.427891000 | 2.120535000  |
| H | 4.343837000  | -0.009293000 | 1.926695000  |
| H | 3.911999000  | 0.828668000  | 3.418053000  |
| H | 5.569707000  | -0.901563000 | 3.926620000  |
| H | 4.586747000  | -2.145032000 | 3.165143000  |
| H | 4.300695000  | -2.255702000 | 5.612259000  |
| H | 3.828251000  | -0.558269000 | 5.667987000  |
| H | 1.811233000  | -2.021783000 | 5.724232000  |
| H | 2.291263000  | -2.769168000 | 4.200784000  |
| C | 1.148670000  | 2.763054000  | 0.769520000  |
| C | 1.486345000  | 4.247899000  | 0.811604000  |
| C | 1.177495000  | 4.832919000  | 2.183759000  |
| C | 1.903877000  | 4.053990000  | 3.271944000  |
| C | 1.589810000  | 2.561826000  | 3.220164000  |
| C | 1.913116000  | 1.977745000  | 1.829589000  |
| H | 1.354020000  | 2.340002000  | -0.223164000 |
| H | 0.066739000  | 2.638797000  | 0.947034000  |
| H | 0.927446000  | 4.780274000  | 0.027857000  |
| H | 2.555196000  | 4.396144000  | 0.581526000  |
| H | 1.451067000  | 5.894836000  | 2.224995000  |
| H | 0.091178000  | 4.780837000  | 2.366076000  |
| H | 1.652758000  | 4.448453000  | 4.264893000  |
| H | 2.991139000  | 4.188941000  | 3.148334000  |
| H | 2.159354000  | 2.048558000  | 4.004177000  |
| H | 0.522616000  | 2.384463000  | 3.434733000  |

|   |             |              |              |
|---|-------------|--------------|--------------|
| H | 2.995172000 | 2.091016000  | 1.671737000  |
| O | 3.472242000 | -1.218190000 | -1.262190000 |
| C | 3.422735000 | -2.576651000 | -0.880624000 |
| C | 1.881401000 | -2.886666000 | -0.737511000 |
| O | 1.266907000 | -1.582845000 | -0.629744000 |
| C | 4.216209000 | -2.730863000 | 0.412800000  |
| H | 5.229016000 | -2.349295000 | 0.236325000  |
| H | 3.781046000 | -2.137075000 | 1.215992000  |
| C | 4.119532000 | -3.423251000 | -1.938036000 |
| H | 4.131438000 | -4.481066000 | -1.644175000 |
| H | 3.651651000 | -3.347506000 | -2.922718000 |
| H | 5.158659000 | -3.087837000 | -2.031234000 |
| C | 1.266771000 | -3.576288000 | -1.949514000 |
| H | 0.176866000 | -3.617454000 | -1.815710000 |
| H | 1.474712000 | -3.043140000 | -2.880448000 |
| H | 1.627496000 | -4.606355000 | -2.054081000 |
| B | 2.269792000 | -0.529315000 | -0.895308000 |
| H | 2.341962000 | 0.115579000  | 0.310672000  |
| H | 0.491732000 | -3.936218000 | 0.537255000  |
| C | 1.565270000 | -3.736898000 | 0.479861000  |
| H | 1.872913000 | -3.270523000 | 1.420900000  |
| H | 2.076791000 | -4.704889000 | 0.397260000  |
| H | 4.293660000 | -3.772438000 | 0.747377000  |

### Intermediate C

|    |              |              |              |
|----|--------------|--------------|--------------|
| La | -0.398330000 | 0.566863000  | 0.214033000  |
| N  | 3.730475000  | -0.681107000 | -0.566789000 |
| N  | -0.650049000 | 0.439931000  | 2.597774000  |
| N  | -0.888086000 | 2.798813000  | -0.559362000 |
| Si | -2.165159000 | 3.381760000  | -1.614546000 |
| Si | 0.590860000  | -0.228792000 | 3.618117000  |
| Si | 4.458069000  | -2.314409000 | -0.287887000 |
| Si | 4.603253000  | 0.793156000  | -0.032144000 |
| Si | 0.178426000  | 3.954464000  | 0.205143000  |
| Si | -2.118624000 | 1.105046000  | 3.277951000  |
| C  | 6.441211000  | 0.634559000  | -0.446280000 |
| H  | 6.943401000  | 1.576249000  | -0.191563000 |
| H  | 6.949790000  | -0.166859000 | 0.099982000  |
| H  | 6.583600000  | 0.461200000  | -1.519567000 |
| C  | 3.998185000  | 2.288726000  | -1.018760000 |
| H  | 2.910804000  | 2.343874000  | -1.125814000 |
| H  | 4.330835000  | 3.209716000  | -0.522617000 |
| H  | 4.436497000  | 2.278414000  | -2.024584000 |
| C  | 4.436129000  | 1.077596000  | 1.823966000  |
| H  | 3.393988000  | 1.062688000  | 2.158318000  |
| H  | 4.980176000  | 0.316979000  | 2.395326000  |

|   |              |              |              |
|---|--------------|--------------|--------------|
| H | 4.854968000  | 2.058069000  | 2.084269000  |
| C | 5.726363000  | -2.741943000 | -1.615790000 |
| H | 6.597878000  | -2.079226000 | -1.578324000 |
| H | 6.080825000  | -3.770972000 | -1.480669000 |
| H | 5.271986000  | -2.661866000 | -2.608587000 |
| C | 5.281804000  | -2.374154000 | 1.409438000  |
| H | 6.126353000  | -1.684900000 | 1.515130000  |
| H | 4.561795000  | -2.166312000 | 2.208625000  |
| H | 5.667841000  | -3.388841000 | 1.567208000  |
| C | 3.056559000  | -3.574949000 | -0.299194000 |
| H | 3.424099000  | -4.555928000 | 0.024907000  |
| H | 2.260434000  | -3.271605000 | 0.392917000  |
| H | 2.623272000  | -3.686388000 | -1.298867000 |
| C | -3.211077000 | 1.690920000  | 1.836941000  |
| H | -2.737406000 | 2.468240000  | 1.222081000  |
| H | -3.493114000 | 0.851080000  | 1.181914000  |
| H | -4.147411000 | 2.104731000  | 2.232330000  |
| C | -3.192347000 | -0.119909000 | 4.251458000  |
| H | -3.450403000 | -0.991395000 | 3.637415000  |
| H | -2.702465000 | -0.479570000 | 5.162877000  |
| H | -4.127628000 | 0.373641000  | 4.546075000  |
| C | -1.774328000 | 2.568897000  | 4.437031000  |
| H | -2.697151000 | 3.111050000  | 4.678212000  |
| H | -1.340061000 | 2.219433000  | 5.383137000  |
| H | -1.066399000 | 3.277852000  | 3.988820000  |
| C | -0.037532000 | -1.357169000 | 5.010497000  |
| H | -0.830867000 | -2.035511000 | 4.676106000  |
| H | 0.788466000  | -1.964566000 | 5.403386000  |
| H | -0.431833000 | -0.761825000 | 5.844157000  |
| C | 1.669019000  | 1.054781000  | 4.518800000  |
| H | 1.065597000  | 1.622516000  | 5.238122000  |
| H | 2.462504000  | 0.543407000  | 5.080256000  |
| H | 2.146405000  | 1.777666000  | 3.847958000  |
| C | 1.749628000  | -1.282354000 | 2.525951000  |
| H | 2.642226000  | -1.550228000 | 3.107986000  |
| H | 1.261713000  | -2.219761000 | 2.227508000  |
| H | 2.129190000  | -0.790687000 | 1.613730000  |
| C | 1.424688000  | 2.971833000  | 1.271612000  |
| H | 1.960237000  | 2.165693000  | 0.746726000  |
| H | 2.211921000  | 3.651756000  | 1.623859000  |
| H | 0.933895000  | 2.554082000  | 2.161980000  |
| C | -0.646075000 | 5.125158000  | 1.449237000  |
| H | -1.353865000 | 4.576634000  | 2.084586000  |
| H | 0.114401000  | 5.573853000  | 2.101499000  |
| H | -1.194992000 | 5.938452000  | 0.963188000  |
| C | 1.172817000  | 5.017100000  | -1.012293000 |

|   |              |              |              |
|---|--------------|--------------|--------------|
| H | 0.526167000  | 5.723914000  | -1.547223000 |
| H | 1.931740000  | 5.602280000  | -0.476928000 |
| H | 1.686545000  | 4.399080000  | -1.759571000 |
| C | -3.024575000 | 4.960145000  | -0.999278000 |
| H | -3.394120000 | 4.854814000  | 0.027601000  |
| H | -2.367415000 | 5.837740000  | -1.038605000 |
| H | -3.886542000 | 5.167755000  | -1.646576000 |
| C | -1.549149000 | 3.833293000  | -3.360516000 |
| H | -0.726189000 | 4.557002000  | -3.308584000 |
| H | -1.197037000 | 2.970689000  | -3.937546000 |
| H | -2.366292000 | 4.298544000  | -3.926887000 |
| C | -3.510077000 | 2.052142000  | -1.763653000 |
| H | -3.106184000 | 1.039046000  | -1.643283000 |
| H | -4.273679000 | 2.188697000  | -0.987525000 |
| H | -4.009258000 | 2.098076000  | -2.740240000 |
| O | -1.661165000 | -1.071248000 | -0.643501000 |
| C | -2.329357000 | -2.270901000 | -0.877003000 |
| C | -2.596086000 | -2.759376000 | 1.629271000  |
| C | -2.118463000 | -3.264711000 | 0.270169000  |
| C | -0.657543000 | -3.698904000 | 0.359819000  |
| C | -0.448153000 | -4.759277000 | 1.434327000  |
| C | -0.964425000 | -4.287116000 | 2.788715000  |
| C | -2.415600000 | -3.824780000 | 2.706521000  |
| H | -3.649131000 | -2.441854000 | 1.575748000  |
| H | -2.016419000 | -1.861988000 | 1.907760000  |
| H | -2.692910000 | -4.175611000 | 0.021650000  |
| H | -0.316186000 | -4.073707000 | -0.618489000 |
| H | -0.033340000 | -2.814232000 | 0.584660000  |
| H | 0.614120000  | -5.035402000 | 1.502015000  |
| H | -0.988231000 | -5.673666000 | 1.138815000  |
| H | -0.853078000 | -5.079416000 | 3.540780000  |
| H | -0.343033000 | -3.444813000 | 3.133643000  |
| H | -2.748778000 | -3.443889000 | 3.683111000  |
| H | -3.059730000 | -4.689551000 | 2.474209000  |
| O | 2.865475000  | -1.430510000 | -2.743130000 |
| C | 1.673302000  | -1.257386000 | -3.526612000 |
| C | 1.178368000  | 0.140298000  | -3.069080000 |
| O | 1.611715000  | 0.153850000  | -1.658246000 |
| C | 0.710534000  | -2.376032000 | -3.159366000 |
| H | 1.215638000  | -3.338073000 | -3.304555000 |
| H | 0.386918000  | -2.307660000 | -2.112268000 |
| C | 2.041042000  | -1.336566000 | -4.993468000 |
| H | 1.172756000  | -1.107874000 | -5.623737000 |
| H | 2.851255000  | -0.646029000 | -5.244357000 |
| H | 2.374316000  | -2.351878000 | -5.233501000 |
| C | 1.887746000  | 1.301059000  | -3.745169000 |

|   |              |              |              |
|---|--------------|--------------|--------------|
| H | 1.612692000  | 2.230382000  | -3.229658000 |
| H | 2.978518000  | 1.193276000  | -3.713689000 |
| H | 1.577175000  | 1.393077000  | -4.791975000 |
| B | 2.773019000  | -0.647927000 | -1.617983000 |
| H | -1.881274000 | -2.766817000 | -1.773018000 |
| H | -0.580076000 | 1.322289000  | -2.776487000 |
| C | -0.315138000 | 0.332067000  | -3.167666000 |
| H | -0.882274000 | -0.428426000 | -2.621422000 |
| H | -0.621583000 | 0.305638000  | -4.221506000 |
| H | -0.186142000 | -2.362604000 | -3.791090000 |
| C | -4.735121000 | -3.194574000 | -1.159878000 |
| C | -3.795537000 | -1.991406000 | -1.253392000 |
| C | -3.857773000 | -1.432898000 | -2.677398000 |
| C | -5.269950000 | -1.035686000 | -3.082902000 |
| C | -6.212727000 | -2.227759000 | -2.970927000 |
| C | -6.159055000 | -2.828360000 | -1.571532000 |
| H | -4.746949000 | -3.608267000 | -0.142379000 |
| H | -4.356058000 | -3.996739000 | -1.818501000 |
| H | -4.164427000 | -1.212208000 | -0.558890000 |
| H | -3.168618000 | -0.586330000 | -2.784024000 |
| H | -3.492544000 | -2.218513000 | -3.364663000 |
| H | -5.278644000 | -0.627329000 | -4.102662000 |
| H | -5.619635000 | -0.227064000 | -2.419798000 |
| H | -7.240775000 | -1.939277000 | -3.226626000 |
| H | -5.910627000 | -2.993722000 | -3.704130000 |
| H | -6.810816000 | -3.709514000 | -1.504668000 |
| H | -6.555633000 | -2.093737000 | -0.851715000 |

### TS3 between C and D

|    |              |              |              |
|----|--------------|--------------|--------------|
| La | -1.290330755 | 0.039797000  | -0.315143000 |
| N  | 3.129609980  | 0.558026000  | -0.931169225 |
| N  | -2.510399245 | 2.024035245  | 0.085298000  |
| N  | -2.757632000 | -1.831929245 | -0.052075245 |
| Si | -2.740463245 | -3.187194000 | 1.079003000  |
| Si | -2.317838245 | 3.361088000  | -1.031225000 |
| Si | 4.797435225  | -0.094955000 | -0.830107755 |
| Si | 3.017413000  | 2.292937735  | -1.316691245 |
| Si | -4.086660000 | -1.749523000 | -1.202632000 |
| Si | -3.685574000 | 2.121756000  | 1.386597000  |
| C  | 4.418258245  | 3.320541000  | -0.554325755 |
| H  | 4.262043245  | 4.359981000  | -0.871836755 |
| H  | 4.375331000  | 3.311390755  | 0.541071245  |
| H  | 5.428958245  | 3.038354755  | -0.859816755 |
| C  | 3.055001000  | 2.700509755  | -3.171595245 |
| H  | 3.219637510  | 3.781003755  | -3.279389735 |
| H  | 3.852464245  | 2.186754755  | -3.716661000 |

|   |              |              |              |
|---|--------------|--------------|--------------|
| H | 2.101759000  | 2.463535265  | -3.656215000 |
| C | 1.438221000  | 3.111542265  | -0.654489510 |
| H | 0.745559469  | 2.390720775  | -0.206607286 |
| H | 1.695610755  | 3.838064245  | 0.128399510  |
| H | 0.922986531  | 3.651798041  | -1.452264510 |
| C | 5.015620490  | -1.970926000 | -0.811925000 |
| H | 4.710216490  | -2.448664755 | -1.748570000 |
| H | 6.092386245  | -2.152186490 | -0.666656755 |
| H | 4.475771000  | -2.454343755 | 0.003608000  |
| C | 5.810512735  | 0.473631000  | -2.333850000 |
| H | 5.394393245  | 0.048115000  | -3.257094755 |
| H | 5.875242490  | 1.559023000  | -2.463680000 |
| H | 6.835399735  | 0.087454245  | -2.232526490 |
| C | 5.715017000  | 0.443984245  | 0.746863490  |
| H | 5.627128755  | 1.505615245  | 0.995176245  |
| H | 5.361252510  | -0.135359755 | 1.610275245  |
| H | 6.782691000  | 0.215275245  | 0.621323980  |
| C | -3.556999755 | 0.555963000  | 2.451812000  |
| H | -3.787660245 | -0.348238000 | 1.875387000  |
| H | -2.568949510 | 0.424676755  | 2.923805020  |
| H | -4.281999265 | 0.622072000  | 3.271947490  |
| C | -3.401134000 | 3.617950000  | 2.508289245  |
| H | -2.365920000 | 3.635005000  | 2.872706245  |
| H | -3.586844000 | 4.562359000  | 1.981772245  |
| H | -4.070330000 | 3.578802245  | 3.376820245  |
| C | -5.486065000 | 2.186485000  | 0.779066245  |
| H | -6.165157245 | 1.979190000  | 1.612074245  |
| H | -5.749778000 | 3.166434000  | 0.365839245  |
| H | -5.670611000 | 1.436079000  | -0.000550755 |
| C | -1.420982000 | 4.854658000  | -0.277627245 |
| H | -0.621269000 | 4.545502000  | 0.399823000  |
| H | -0.987449755 | 5.492496000  | -1.060655000 |
| H | -2.128559000 | 5.468612000  | 0.293111755  |
| C | -3.948216000 | 4.043408245  | -1.726082245 |
| H | -4.534469000 | 4.569705000  | -0.959796245 |
| H | -3.722844000 | 4.770364245  | -2.517309245 |
| H | -4.577553000 | 3.256449245  | -2.158800245 |
| C | -1.403921000 | 2.708445755  | -2.581169000 |
| H | -2.096556245 | 2.123058000  | -3.201858000 |
| H | -1.076474000 | 3.560924755  | -3.191374000 |
| H | -0.495936245 | 2.105709755  | -2.404944000 |
| C | -3.867753490 | -0.193399000 | -2.293999245 |
| H | -3.006448490 | -0.212772000 | -2.975281245 |
| H | -4.752008490 | -0.143536000 | -2.947197000 |
| H | -3.859510245 | 0.746495755  | -1.719328000 |
| C | -5.813568000 | -1.541773000 | -0.442077000 |



|   |              |              |              |
|---|--------------|--------------|--------------|
| H | -5.780297000 | -0.884628000 | 0.436620000  |
| H | -6.484985245 | -1.084330000 | -1.175566000 |
| H | -6.251826000 | -2.495242000 | -0.131191000 |
| C | -4.118252245 | -3.222955000 | -2.391936245 |
| H | -4.310019000 | -4.167901000 | -1.872832000 |
| H | -4.907017245 | -3.091603245 | -3.149007000 |
| H | -3.158979245 | -3.320478000 | -2.917178245 |
| C | -4.459767000 | -3.936103245 | 1.412523755  |
| H | -5.155395000 | -3.197864245 | 1.823659000  |
| H | -4.917257245 | -4.385366245 | 0.520878000  |
| H | -4.337377000 | -4.733074245 | 2.152684000  |
| C | -1.663420000 | -4.642420000 | 0.516762000  |
| H | -1.904735000 | -4.948902000 | -0.508885000 |
| H | -0.594381000 | -4.411863755 | 0.560621000  |
| H | -1.847087755 | -5.500985000 | 1.176772000  |
| C | -2.146817245 | -2.661137000 | 2.808269755  |
| H | -1.254629490 | -2.027546510 | 2.808987265  |
| H | -2.939874245 | -2.121943245 | 3.339445000  |
| H | -1.903791510 | -3.561838755 | 3.388679755  |
| O | 1.010969897  | -0.074233490 | 0.466690347  |
| C | 1.183266306  | -0.380968245 | 1.861940388  |
| C | 0.291999000  | 1.834847490  | 2.792999204  |
| C | 1.461738755  | 0.844653490  | 2.745101184  |
| C | 2.762877265  | 1.562553755  | 2.396210735  |
| C | 3.039212245  | 2.739177490  | 3.323941510  |
| C | 1.878651245  | 3.726820490  | 3.325253000  |
| C | 0.581882245  | 3.020657225  | 3.711553980  |
| H | -0.614811245 | 1.314079980  | 3.136362694  |
| H | 0.073633000  | 2.213552510  | 1.778149959  |
| H | 1.556069980  | 0.451606204  | 3.774814674  |
| H | 3.603651265  | 0.857615755  | 2.423435245  |
| H | 2.698245041  | 1.907139020  | 1.357898490  |
| H | 3.973749000  | 3.241125245  | 3.025239775  |
| H | 3.200211980  | 2.368766980  | 4.346502755  |
| H | 2.075969980  | 4.558755980  | 4.011991265  |
| H | 1.768504755  | 4.166697000  | 2.321501755  |
| H | -0.261213510 | 3.726068469  | 3.690406735  |
| H | 0.664743490  | 2.659199204  | 4.750945225  |
| O | 2.174474959  | -1.699269245 | -1.157606184 |
| C | 1.467652755  | -2.203959980 | -2.273162959 |
| C | 0.894209755  | -0.920522980 | -2.963005959 |
| O | 0.791330204  | 0.007799000  | -1.864325204 |
| C | 0.386562245  | -3.167450000 | -1.786175000 |
| H | 0.868007490  | -3.946213755 | -1.186071755 |
| H | -0.381921020 | -2.699374265 | -1.154441755 |
| C | 2.414875265  | -2.998740469 | -3.160928959 |

|   |              |              |              |
|---|--------------|--------------|--------------|
| H | 1.895796020  | -3.382267714 | -4.053872469 |
| H | 3.271546265  | -2.404400469 | -3.484346449 |
| H | 2.794202510  | -3.862934980 | -2.595904714 |
| C | 1.816329265  | -0.343868225 | -4.026978449 |
| H | 1.397054510  | 0.604826020  | -4.383360959 |
| H | 2.812549755  | -0.146252469 | -3.618337429 |
| H | 1.905920531  | -1.015808225 | -4.883953694 |
| B | 1.903640898  | -0.318531490 | -0.883618307 |
| H | -0.845338735 | -0.142955000 | -3.972532000 |
| C | -0.485564735 | -1.105307000 | -3.579918245 |
| H | -1.223975245 | -1.506622755 | -2.873809510 |
| H | -0.445386959 | -1.809438245 | -4.416853245 |
| H | -0.133959490 | -3.659620490 | -2.622262020 |
| H | 0.178759245  | -0.746402225 | 2.219431531  |
| H | 3.840581000  | -5.028620000 | 2.890092265  |
| H | 2.351186000  | -4.530465000 | 3.685539510  |
| C | 3.096260245  | -4.218936000 | 2.935183755  |
| C | 2.405032000  | -4.040049265 | 1.592503755  |
| H | 1.859712245  | -4.954535265 | 1.317193265  |
| H | 3.143364245  | -3.864432020 | 0.793428000  |
| C | 1.448021000  | -2.860157265 | 1.647140245  |
| H | 0.667026755  | -3.067207245 | 2.399576755  |
| H | 0.944692245  | -2.726183531 | 0.683943245  |
| C | 2.153679020  | -1.559749265 | 2.036836714  |
| H | 2.981886041  | -1.383627306 | 1.330076980  |
| H | 4.582758000  | -2.670084000 | 2.720214755  |
| C | 3.754401245  | -2.922323245 | 3.402778000  |
| H | 4.202146735  | -3.060734490 | 4.395367755  |
| C | 2.770373245  | -1.754146245 | 3.427792735  |
| H | 1.968428735  | -1.951579735 | 4.159635225  |
| H | 3.292768245  | -0.846947490 | 3.768935980  |

#### Intermediate D

|    |              |              |              |
|----|--------------|--------------|--------------|
| La | -0.842310000 | -0.263337000 | -0.008772000 |
| N  | -1.758681000 | -0.112435000 | 2.218107000  |
| N  | 0.036231000  | -2.451784000 | -0.590349000 |
| N  | -2.449616000 | 0.259077000  | -1.732173000 |
| Si | -2.476496000 | 1.643815000  | -2.806843000 |
| Si | -0.088085000 | -3.954447000 | 0.320325000  |
| Si | -0.746647000 | -0.527349000 | 3.594425000  |
| Si | -3.409333000 | 0.390102000  | 2.581767000  |
| Si | -3.693375000 | -0.963316000 | -1.952606000 |
| Si | 0.684517000  | -2.545125000 | -2.216304000 |
| C  | -3.590504000 | 1.388804000  | 4.195064000  |
| H  | -4.644764000 | 1.677415000  | 4.298357000  |
| H  | -3.315550000 | 0.826510000  | 5.094614000  |

|   |              |              |              |
|---|--------------|--------------|--------------|
| H | -2.998425000 | 2.312206000  | 4.180806000  |
| C | -4.071669000 | 1.550725000  | 1.233204000  |
| H | -3.770707000 | 1.258552000  | 0.217406000  |
| H | -5.169237000 | 1.569273000  | 1.265074000  |
| H | -3.727843000 | 2.578428000  | 1.411998000  |
| C | -4.617223000 | -1.066134000 | 2.741407000  |
| H | -4.856786000 | -1.513839000 | 1.769725000  |
| H | -4.209788000 | -1.856161000 | 3.383747000  |
| H | -5.559191000 | -0.719846000 | 3.185800000  |
| C | -0.061651000 | 0.952357000  | 4.577164000  |
| H | -0.818992000 | 1.690760000  | 4.860513000  |
| H | 0.405448000  | 0.577232000  | 5.497405000  |
| H | 0.724211000  | 1.460490000  | 4.000899000  |
| C | -1.564838000 | -1.685021000 | 4.858032000  |
| H | -2.416111000 | -1.223100000 | 5.371018000  |
| H | -1.916335000 | -2.608890000 | 4.384504000  |
| H | -0.827534000 | -1.959589000 | 5.623586000  |
| C | 0.828393000  | -1.415450000 | 3.015226000  |
| H | 1.571654000  | -1.357165000 | 3.822684000  |
| H | 0.650466000  | -2.473872000 | 2.802321000  |
| H | 1.299259000  | -0.966368000 | 2.129222000  |
| C | 0.610236000  | -0.811528000 | -3.003562000 |
| H | -0.427439000 | -0.526205000 | -3.221108000 |
| H | 1.073672000  | -0.011405000 | -2.407440000 |
| H | 1.156408000  | -0.838965000 | -3.956142000 |
| C | 2.489483000  | -3.131719000 | -2.338044000 |
| H | 2.591288000  | -4.177988000 | -2.022571000 |
| H | 2.822728000  | -3.070108000 | -3.382960000 |
| H | 3.172799000  | -2.531122000 | -1.724973000 |
| C | -0.281690000 | -3.643731000 | -3.432212000 |
| H | -0.125901000 | -3.279653000 | -4.456619000 |
| H | 0.042958000  | -4.689160000 | -3.397636000 |
| H | -1.358730000 | -3.621593000 | -3.229339000 |
| C | 1.556459000  | -4.519588000 | 1.088977000  |
| H | 1.951686000  | -3.821444000 | 1.833257000  |
| H | 1.415306000  | -5.492316000 | 1.578175000  |
| H | 2.321772000  | -4.645355000 | 0.311822000  |
| C | -0.616155000 | -5.466058000 | -0.709629000 |
| H | 0.157369000  | -5.783647000 | -1.419058000 |
| H | -0.785339000 | -6.300227000 | -0.015594000 |
| H | -1.545482000 | -5.302990000 | -1.267171000 |
| C | -1.398096000 | -3.835490000 | 1.699333000  |
| H | -2.350666000 | -4.250627000 | 1.347355000  |
| H | -1.080682000 | -4.422445000 | 2.571760000  |
| H | -1.600025000 | -2.812418000 | 2.039967000  |
| C | -3.435593000 | -2.315570000 | -0.641528000 |

|   |              |              |              |
|---|--------------|--------------|--------------|
| H | -3.281326000 | -1.946654000 | 0.383672000  |
| H | -4.333223000 | -2.946419000 | -0.598145000 |
| H | -2.585532000 | -2.958021000 | -0.902619000 |
| C | -3.633764000 | -1.860888000 | -3.627212000 |
| H | -2.603330000 | -1.969125000 | -3.986225000 |
| H | -4.061804000 | -2.866845000 | -3.524858000 |
| H | -4.202935000 | -1.333200000 | -4.400316000 |
| C | -5.467561000 | -0.316892000 | -1.759813000 |
| H | -5.721307000 | 0.415991000  | -2.535808000 |
| H | -6.172491000 | -1.152932000 | -1.855084000 |
| H | -5.629485000 | 0.155407000  | -0.783964000 |
| C | -2.896154000 | 1.251688000  | -4.619691000 |
| H | -2.230168000 | 0.494700000  | -5.050006000 |
| H | -3.929330000 | 0.908587000  | -4.748744000 |
| H | -2.781307000 | 2.172957000  | -5.206400000 |
| C | -3.757798000 | 2.962174000  | -2.316150000 |
| H | -4.768459000 | 2.608320000  | -2.554359000 |
| H | -3.745877000 | 3.201236000  | -1.248251000 |
| H | -3.589639000 | 3.888767000  | -2.881060000 |
| C | -0.754687000 | 2.457533000  | -2.909358000 |
| H | -0.264957000 | 2.549097000  | -1.933598000 |
| H | -0.097737000 | 1.876973000  | -3.569873000 |
| H | -0.845960000 | 3.467003000  | -3.333572000 |
| O | 1.877841000  | 1.027229000  | 0.336373000  |
| C | 3.334417000  | 0.942197000  | 0.198454000  |
| C | 5.121447000  | 0.535512000  | -1.582164000 |
| C | 3.628657000  | 0.693494000  | -1.280725000 |
| C | 3.070387000  | 1.844796000  | -2.128092000 |
| C | 3.341908000  | 1.675358000  | -3.617528000 |
| C | 4.827194000  | 1.490497000  | -3.893299000 |
| C | 5.371954000  | 0.330249000  | -3.072531000 |
| H | 5.548119000  | -0.306495000 | -1.024685000 |
| H | 5.653566000  | 1.441219000  | -1.240901000 |
| H | 3.119297000  | -0.241947000 | -1.577994000 |
| H | 1.986992000  | 1.954415000  | -1.971708000 |
| H | 3.533894000  | 2.784315000  | -1.776673000 |
| H | 2.940881000  | 2.536525000  | -4.168062000 |
| H | 2.795411000  | 0.791584000  | -3.983051000 |
| H | 5.004638000  | 1.326920000  | -4.963677000 |
| H | 5.368298000  | 2.411534000  | -3.621426000 |
| H | 6.444968000  | 0.192009000  | -3.255442000 |
| H | 4.876436000  | -0.603405000 | -3.388156000 |
| O | 1.977271000  | 3.396571000  | 0.916958000  |
| C | 1.013126000  | 4.468581000  | 0.763221000  |
| C | -0.354573000 | 3.730111000  | 0.918333000  |
| O | -0.028949000 | 2.394522000  | 0.406202000  |

|   |              |              |              |
|---|--------------|--------------|--------------|
| C | 1.230329000  | 5.059416000  | -0.621249000 |
| H | 2.276570000  | 5.372073000  | -0.707581000 |
| H | 1.027657000  | 4.331547000  | -1.416528000 |
| C | 1.276765000  | 5.515429000  | 1.823599000  |
| H | 0.509635000  | 6.298670000  | 1.786462000  |
| H | 1.289766000  | 5.084535000  | 2.828000000  |
| H | 2.248919000  | 5.985492000  | 1.641717000  |
| C | -0.783682000 | 3.545594000  | 2.359726000  |
| H | -1.566808000 | 2.779152000  | 2.395307000  |
| H | 0.041555000  | 3.198287000  | 2.989876000  |
| H | -1.176512000 | 4.478545000  | 2.780091000  |
| B | 1.336253000  | 2.252591000  | 0.562637000  |
| H | -2.392644000 | 3.728748000  | 0.264847000  |
| C | -1.483214000 | 4.318494000  | 0.106594000  |
| H | -1.272986000 | 4.334354000  | -0.966126000 |
| H | -1.684871000 | 5.343947000  | 0.440607000  |
| H | 0.595190000  | 5.936910000  | -0.785723000 |
| H | 3.729220000  | 1.939695000  | 0.455059000  |
| C | 5.262138000  | 0.337983000  | 1.743126000  |
| C | 3.859256000  | -0.038099000 | 1.249835000  |
| C | 3.776842000  | -1.515061000 | 0.861929000  |
| C | 4.261644000  | -2.416475000 | 1.993614000  |
| C | 5.659946000  | -2.030915000 | 2.459151000  |
| C | 5.702587000  | -0.569091000 | 2.885250000  |
| H | 5.267891000  | 1.390348000  | 2.062589000  |
| H | 5.994865000  | 0.257783000  | 0.927087000  |
| H | 3.194264000  | 0.107906000  | 2.121138000  |
| H | 2.748739000  | -1.782928000 | 0.567248000  |
| H | 4.406782000  | -1.701816000 | -0.022649000 |
| H | 4.235851000  | -3.464776000 | 1.670763000  |
| H | 3.564233000  | -2.337345000 | 2.844026000  |
| H | 5.984489000  | -2.683313000 | 3.279708000  |
| H | 6.374489000  | -2.186501000 | 1.633687000  |
| H | 6.707978000  | -0.289189000 | 3.224890000  |
| H | 5.028144000  | -0.423533000 | 3.745157000  |

**Ketone borylated product**

|   |              |              |              |
|---|--------------|--------------|--------------|
| O | -2.132616000 | -1.151461000 | -1.131620000 |
| C | -3.438842000 | -1.101689000 | -0.532240000 |
| B | -1.253792000 | -0.710304000 | -0.173825000 |
| C | -3.256887000 | -0.013286000 | 0.569943000  |
| O | -1.876327000 | -0.185158000 | 0.939083000  |
| C | -3.724517000 | -2.481545000 | 0.042856000  |
| H | -3.615362000 | -3.223301000 | -0.755363000 |
| H | -3.016174000 | -2.734846000 | 0.840084000  |
| H | -4.742179000 | -2.552310000 | 0.444408000  |

|   |              |              |              |
|---|--------------|--------------|--------------|
| C | -4.457726000 | -0.761275000 | -1.599529000 |
| H | -5.451747000 | -0.620815000 | -1.155815000 |
| H | -4.183759000 | 0.146271000  | -2.144706000 |
| H | -4.522180000 | -1.581644000 | -2.322583000 |
| C | -4.125588000 | -0.192109000 | 1.796421000  |
| H | -3.924705000 | -1.142823000 | 2.298020000  |
| H | -3.928289000 | 0.615138000  | 2.510351000  |
| H | -5.188658000 | -0.153868000 | 1.526427000  |
| C | -3.392750000 | 1.403544000  | 0.029233000  |
| H | -3.031303000 | 2.106073000  | 0.788958000  |
| H | -2.787447000 | 1.541033000  | -0.875785000 |
| H | -4.433313000 | 1.654912000  | -0.206935000 |
| O | 0.082852000  | -0.782344000 | -0.342504000 |
| C | 0.961240000  | -0.106023000 | 0.557485000  |
| C | 3.002448000  | -0.692588000 | -0.908252000 |
| C | 2.331673000  | -0.777143000 | 0.463441000  |
| C | 2.219138000  | -2.239360000 | 0.906332000  |
| C | 3.564936000  | -2.951643000 | 0.892681000  |
| C | 4.199081000  | -2.877444000 | -0.490400000 |
| C | 4.339901000  | -1.427241000 | -0.932735000 |
| H | 3.165021000  | 0.354905000  | -1.191850000 |
| H | 2.321222000  | -1.121599000 | -1.659693000 |
| H | 2.984016000  | -0.265152000 | 1.193690000  |
| H | 1.766295000  | -2.286917000 | 1.907812000  |
| H | 1.527109000  | -2.757180000 | 0.224997000  |
| H | 3.446132000  | -3.995807000 | 1.210524000  |
| H | 4.239215000  | -2.476992000 | 1.624696000  |
| H | 5.174869000  | -3.380594000 | -0.499470000 |
| H | 3.559866000  | -3.415269000 | -1.209119000 |
| H | 4.782264000  | -1.368427000 | -1.935813000 |
| H | 5.041807000  | -0.914732000 | -0.253779000 |
| C | 1.930255000  | 2.181870000  | 1.121901000  |
| C | 1.684747000  | 3.685603000  | 1.057651000  |
| C | 1.613559000  | 4.165315000  | -0.387726000 |
| C | 0.552980000  | 3.395460000  | -1.167111000 |
| C | 0.807138000  | 1.892036000  | -1.110865000 |
| C | 0.864026000  | 1.414194000  | 0.342357000  |
| H | 1.956129000  | 1.839219000  | 2.167317000  |
| H | 2.924695000  | 1.965473000  | 0.697095000  |
| H | 2.468580000  | 4.224426000  | 1.605805000  |
| H | 0.733194000  | 3.917567000  | 1.562796000  |
| H | 1.415759000  | 5.244491000  | -0.426537000 |
| H | 2.594373000  | 4.009478000  | -0.866369000 |
| H | 0.517982000  | 3.736409000  | -2.210004000 |
| H | -0.437805000 | 3.613136000  | -0.734293000 |
| H | 0.025669000  | 1.347660000  | -1.657997000 |

|   |              |              |              |
|---|--------------|--------------|--------------|
| H | 1.752085000  | 1.672803000  | -1.628733000 |
| H | -0.112304000 | 1.692197000  | 0.782609000  |
| H | 0.607759000  | -0.285746000 | 1.590055000  |

**cyclohexanecarboxaldehyde**

|   |              |              |              |
|---|--------------|--------------|--------------|
| O | -3.094940000 | -0.000003000 | -0.312343000 |
| C | -2.072477000 | 0.000029000  | 0.326505000  |
| C | 0.062319000  | -1.258367000 | 0.221409000  |
| C | -0.681560000 | 0.000008000  | -0.241480000 |
| C | 0.062332000  | 1.258374000  | 0.221416000  |
| C | 1.510239000  | 1.255347000  | -0.254646000 |
| C | 2.240248000  | -0.000008000 | 0.208056000  |
| C | 1.510226000  | -1.255354000 | -0.254651000 |
| H | -0.462053000 | -2.155963000 | -0.131757000 |
| H | 0.040880000  | -1.294049000 | 1.324347000  |
| H | -0.770281000 | 0.000015000  | -1.338614000 |
| H | -0.462032000 | 2.155976000  | -0.131746000 |
| H | 0.040894000  | 1.294052000  | 1.324355000  |
| H | 2.024944000  | 2.156810000  | 0.101034000  |
| H | 1.526560000  | 1.299376000  | -1.355221000 |
| H | 3.274823000  | -0.000013000 | -0.157562000 |
| H | 2.296970000  | -0.000011000 | 1.308704000  |
| H | 2.024922000  | -2.156824000 | 0.101025000  |
| H | 1.526548000  | -1.299379000 | -1.355227000 |
| H | -2.090627000 | -0.000135000 | 1.449753000  |

**intermediate E**

|    |              |              |              |
|----|--------------|--------------|--------------|
| La | -0.601483000 | -0.011455000 | 0.096536000  |
| N  | 2.101839000  | 0.210088000  | 0.880427000  |
| N  | -2.000991000 | -1.915164000 | -0.197761000 |
| N  | -1.728622000 | 2.039954000  | -0.290093000 |
| Si | -1.241231000 | 3.305360000  | -1.398477000 |
| Si | -2.707043000 | -2.975854000 | 0.995358000  |
| Si | 2.280998000  | -1.315245000 | 1.828744000  |
| Si | 2.308780000  | 1.791780000  | 1.726208000  |
| Si | -3.224208000 | 2.157762000  | 0.606717000  |
| Si | -2.188938000 | -2.248104000 | -1.909444000 |
| C  | 2.733728000  | 3.183712000  | 0.526247000  |
| H  | 2.757026000  | 4.118275000  | 1.102950000  |
| H  | 3.716996000  | 3.052705000  | 0.061564000  |
| H  | 1.990305000  | 3.311371000  | -0.269758000 |
| C  | 0.664223000  | 2.277611000  | 2.542799000  |
| H  | 0.308132000  | 1.545107000  | 3.277854000  |
| H  | 0.800943000  | 3.226138000  | 3.078653000  |
| H  | -0.126920000 | 2.464317000  | 1.796762000  |
| C  | 3.665430000  | 1.768780000  | 3.042527000  |

|   |              |              |              |
|---|--------------|--------------|--------------|
| H | 3.500818000  | 1.040194000  | 3.843086000  |
| H | 4.646308000  | 1.569653000  | 2.594823000  |
| H | 3.711347000  | 2.761564000  | 3.507542000  |
| C | 4.040032000  | -1.803030000 | 2.312222000  |
| H | 4.560421000  | -1.008832000 | 2.858277000  |
| H | 3.981654000  | -2.677582000 | 2.973076000  |
| H | 4.651653000  | -2.081150000 | 1.447597000  |
| C | 1.317744000  | -1.081784000 | 3.448166000  |
| H | 1.748503000  | -0.313173000 | 4.099195000  |
| H | 0.254683000  | -0.842837000 | 3.307973000  |
| H | 1.344954000  | -2.030271000 | 4.000110000  |
| C | 1.504360000  | -2.793936000 | 0.931454000  |
| H | 1.573099000  | -3.657151000 | 1.608464000  |
| H | 0.443459000  | -2.691865000 | 0.657953000  |
| H | 2.039807000  | -3.043425000 | 0.009819000  |
| C | -1.737596000 | -0.655209000 | -2.863235000 |
| H | -2.299725000 | 0.228436000  | -2.523359000 |
| H | -0.660603000 | -0.428341000 | -2.856675000 |
| H | -2.000549000 | -0.808404000 | -3.917596000 |
| C | -0.994216000 | -3.580290000 | -2.530736000 |
| H | 0.037010000  | -3.283004000 | -2.298819000 |
| H | -1.181670000 | -4.552550000 | -2.060995000 |
| H | -1.073844000 | -3.705771000 | -3.617776000 |
| C | -3.954275000 | -2.712460000 | -2.417281000 |
| H | -4.013199000 | -2.823359000 | -3.507226000 |
| H | -4.280565000 | -3.659656000 | -1.971155000 |
| H | -4.665647000 | -1.933897000 | -2.116735000 |
| C | -2.406277000 | -4.814929000 | 0.635890000  |
| H | -1.332398000 | -5.020117000 | 0.539509000  |
| H | -2.797203000 | -5.430680000 | 1.455722000  |
| H | -2.895404000 | -5.146249000 | -0.288097000 |
| C | -4.576229000 | -2.725886000 | 1.206304000  |
| H | -5.117508000 | -2.969667000 | 0.284980000  |
| H | -4.963877000 | -3.370684000 | 2.005243000  |
| H | -4.815852000 | -1.686883000 | 1.465222000  |
| C | -1.915045000 | -2.660735000 | 2.699154000  |
| H | -2.420344000 | -3.282982000 | 3.448701000  |
| H | -0.854017000 | -2.941639000 | 2.709885000  |
| H | -2.009404000 | -1.621588000 | 3.043860000  |
| C | -3.104723000 | 0.933245000  | 2.071398000  |
| H | -2.239239000 | 1.124877000  | 2.724713000  |
| H | -3.996713000 | 1.029267000  | 2.702855000  |
| H | -3.093341000 | -0.113292000 | 1.734530000  |
| C | -4.736644000 | 1.605929000  | -0.387511000 |
| H | -4.583540000 | 0.575056000  | -0.735515000 |
| H | -5.647769000 | 1.624860000  | 0.223390000  |



|   |              |              |              |
|---|--------------|--------------|--------------|
| H | -4.900460000 | 2.238605000  | -1.267367000 |
| C | -3.534893000 | 3.863154000  | 1.370366000  |
| H | -3.701936000 | 4.637578000  | 0.612653000  |
| H | -4.421875000 | 3.833071000  | 2.015247000  |
| H | -2.678292000 | 4.170388000  | 1.983748000  |
| C | -2.652240000 | 3.868227000  | -2.536263000 |
| H | -3.042196000 | 3.021283000  | -3.114729000 |
| H | -3.487796000 | 4.309723000  | -1.979032000 |
| H | -2.292395000 | 4.623479000  | -3.246058000 |
| C | -0.610148000 | 4.848785000  | -0.484185000 |
| H | -1.430767000 | 5.375925000  | 0.016527000  |
| H | 0.130983000  | 4.589040000  | 0.282530000  |
| H | -0.138857000 | 5.550180000  | -1.184350000 |
| C | 0.140618000  | 2.682869000  | -2.539856000 |
| H | 0.949849000  | 2.149029000  | -2.025119000 |
| H | -0.262428000 | 1.991928000  | -3.291065000 |
| H | 0.586958000  | 3.531678000  | -3.073541000 |
| O | 1.217709000  | -0.308665000 | -1.253209000 |
| C | 2.338731000  | 0.165868000  | -0.631825000 |
| H | 2.528776000  | 1.220942000  | -0.925151000 |
| C | 4.949299000  | -1.409056000 | -3.013475000 |
| C | 3.676508000  | -0.706800000 | -2.556123000 |
| C | 3.610158000  | -0.585893000 | -1.034212000 |
| C | 4.866685000  | 0.106702000  | -0.510457000 |
| C | 6.139682000  | -0.603023000 | -0.957594000 |
| C | 6.196067000  | -0.716379000 | -2.476490000 |
| H | 4.980020000  | -1.463498000 | -4.109316000 |
| H | 4.934670000  | -2.450752000 | -2.652239000 |
| H | 2.782590000  | -1.227807000 | -2.916072000 |
| H | 3.636953000  | 0.309684000  | -2.987489000 |
| H | 3.571808000  | -1.612317000 | -0.625474000 |
| H | 4.837538000  | 0.189077000  | 0.585544000  |
| H | 4.879207000  | 1.139210000  | -0.903051000 |
| H | 7.024206000  | -0.078130000 | -0.573715000 |
| H | 6.165376000  | -1.615441000 | -0.520061000 |
| H | 7.102931000  | -1.249538000 | -2.790203000 |
| H | 6.261695000  | 0.295383000  | -2.908897000 |

#### TS4 between E and F

|    |              |              |              |
|----|--------------|--------------|--------------|
| La | 0.674278000  | 0.480705000  | -0.310014000 |
| N  | 2.194469000  | -0.045021000 | 1.581327000  |
| N  | 0.333298000  | 2.704916000  | -1.091370000 |
| Si | 0.684476000  | 2.951646000  | -2.765772000 |
| Si | 1.618528000  | -0.603142000 | 3.172482000  |
| Si | 3.660537000  | 0.940257000  | 1.516322000  |
| Si | -0.297240000 | 3.819881000  | 0.078292000  |

|   |              |              |              |
|---|--------------|--------------|--------------|
| C | 5.259693000  | -0.074820000 | 1.643314000  |
| H | 6.080156000  | 0.401109000  | 1.091103000  |
| H | 5.571866000  | -0.153951000 | 2.691746000  |
| H | 5.114090000  | -1.093947000 | 1.270082000  |
| C | 3.648032000  | 1.920857000  | -0.126133000 |
| H | 3.542452000  | 1.321223000  | -1.039198000 |
| H | 2.868254000  | 2.697243000  | -0.139222000 |
| H | 4.611452000  | 2.439314000  | -0.218956000 |
| C | 3.794932000  | 2.310568000  | 2.820018000  |
| H | 2.873024000  | 2.899301000  | 2.903519000  |
| H | 4.044317000  | 1.920198000  | 3.813242000  |
| H | 4.603215000  | 2.991825000  | 2.522832000  |
| C | 2.870134000  | -1.797798000 | 3.938229000  |
| H | 3.793804000  | -1.272409000 | 4.214062000  |
| H | 2.465371000  | -2.258715000 | 4.847340000  |
| H | 3.138190000  | -2.592298000 | 3.231676000  |
| C | 1.297018000  | 0.774956000  | 4.440077000  |
| H | 2.186878000  | 1.339025000  | 4.732417000  |
| H | 0.541576000  | 1.488072000  | 4.086261000  |
| H | 0.893346000  | 0.299711000  | 5.344057000  |
| C | -0.074193000 | -1.451044000 | 3.034003000  |
| H | -0.522806000 | -1.495506000 | 4.035454000  |
| H | -0.758263000 | -0.881487000 | 2.388254000  |
| H | -0.021857000 | -2.471534000 | 2.638823000  |
| C | -0.738325000 | 2.732555000  | 1.588189000  |
| H | 0.161416000  | 2.277512000  | 2.038859000  |
| H | -1.193214000 | 3.329881000  | 2.388335000  |
| H | -1.457683000 | 1.932519000  | 1.345789000  |
| C | -1.834882000 | 4.769236000  | -0.487391000 |
| H | -2.583392000 | 4.100980000  | -0.929767000 |
| H | -2.301698000 | 5.293178000  | 0.356242000  |
| H | -1.569059000 | 5.522842000  | -1.239511000 |
| C | 0.979878000  | 5.095115000  | 0.657918000  |
| H | 1.325319000  | 5.711742000  | -0.181345000 |
| H | 0.558899000  | 5.766190000  | 1.416662000  |
| H | 1.860367000  | 4.604008000  | 1.092363000  |
| C | -0.743912000 | 3.607858000  | -3.818059000 |
| H | -1.624615000 | 2.960525000  | -3.735546000 |
| H | -1.038659000 | 4.616237000  | -3.504154000 |
| H | -0.449867000 | 3.659540000  | -4.873905000 |
| C | 2.189379000  | 4.057449000  | -3.082351000 |
| H | 1.989562000  | 5.080955000  | -2.741148000 |
| H | 3.069937000  | 3.693304000  | -2.539365000 |
| H | 2.435460000  | 4.105002000  | -4.150348000 |
| C | 1.107920000  | 1.201973000  | -3.450837000 |
| H | 2.021726000  | 0.767216000  | -3.012653000 |

|    |              |              |              |
|----|--------------|--------------|--------------|
| H  | 0.276301000  | 0.485030000  | -3.340141000 |
| H  | 1.303427000  | 1.262321000  | -4.528330000 |
| O  | 3.420634000  | -2.708866000 | 0.569538000  |
| C  | 3.784599000  | -3.217446000 | -0.723858000 |
| C  | 3.320797000  | -2.085630000 | -1.697428000 |
| O  | 2.200404000  | -1.513657000 | -0.968056000 |
| C  | 3.014078000  | -4.518136000 | -0.925400000 |
| H  | 3.245202000  | -5.189580000 | -0.092112000 |
| H  | 1.929918000  | -4.348920000 | -0.927441000 |
| C  | 5.272967000  | -3.497660000 | -0.742488000 |
| H  | 5.591772000  | -3.837451000 | -1.736176000 |
| H  | 5.861065000  | -2.617909000 | -0.465886000 |
| H  | 5.498999000  | -4.293084000 | -0.024605000 |
| C  | 4.380947000  | -1.022208000 | -1.917731000 |
| H  | 3.957685000  | -0.191832000 | -2.497120000 |
| H  | 4.773593000  | -0.627303000 | -0.974492000 |
| H  | 5.217354000  | -1.426347000 | -2.499364000 |
| B  | 2.265742000  | -1.974992000 | 0.388418000  |
| H  | 1.223326000  | -2.243524000 | 0.905633000  |
| H  | 2.501202000  | -1.711052000 | -3.652235000 |
| C  | 2.797963000  | -2.569206000 | -3.036347000 |
| H  | 1.925011000  | -3.218511000 | -2.920695000 |
| H  | 3.577100000  | -3.118527000 | -3.579992000 |
| H  | 3.291513000  | -5.018578000 | -1.860251000 |
| N  | -3.572407000 | -0.529578000 | 0.545653000  |
| Si | -4.224414000 | 0.696192000  | -0.571262000 |
| Si | -4.187621000 | -0.668637000 | 2.206543000  |
| C  | -3.763739000 | -2.352288000 | 2.956486000  |
| H  | -4.265564000 | -2.426893000 | 3.929905000  |
| H  | -4.126702000 | -3.175553000 | 2.330279000  |
| H  | -2.690519000 | -2.492344000 | 3.126422000  |
| C  | -3.495853000 | 0.655923000  | 3.371916000  |
| H  | -3.771515000 | 1.669514000  | 3.059830000  |
| H  | -3.875739000 | 0.499173000  | 4.389457000  |
| H  | -2.399619000 | 0.602594000  | 3.412499000  |
| C  | -6.079134000 | -0.579268000 | 2.196831000  |
| H  | -6.484859000 | 0.356004000  | 1.797306000  |
| H  | -6.486541000 | -1.406517000 | 1.601856000  |
| H  | -6.453082000 | -0.690332000 | 3.222150000  |
| C  | -5.784987000 | 0.051377000  | -1.432407000 |
| H  | -6.546602000 | -0.267358000 | -0.711739000 |
| H  | -6.223393000 | 0.831911000  | -2.066819000 |
| H  | -5.550078000 | -0.808381000 | -2.072655000 |
| C  | -4.656941000 | 2.287206000  | 0.365899000  |
| H  | -5.407096000 | 2.155902000  | 1.152792000  |
| H  | -3.757124000 | 2.721600000  | 0.822043000  |

|   |              |              |              |
|---|--------------|--------------|--------------|
| H | -5.052855000 | 3.022276000  | -0.346996000 |
| C | -3.036153000 | 1.251399000  | -1.939691000 |
| H | -3.584167000 | 1.961509000  | -2.576388000 |
| H | -2.155637000 | 1.768273000  | -1.536540000 |
| H | -2.687637000 | 0.431302000  | -2.577664000 |
| O | -1.291992000 | -0.462180000 | -0.039803000 |
| C | -2.379236000 | -1.286659000 | 0.167368000  |
| H | -2.147078000 | -1.977322000 | 1.006147000  |
| C | -1.563330000 | -3.854300000 | -2.652498000 |
| C | -1.333841000 | -2.902772000 | -1.483247000 |
| C | -2.618917000 | -2.198333000 | -1.049378000 |
| C | -3.704646000 | -3.231197000 | -0.753859000 |
| C | -3.948262000 | -4.157214000 | -1.938587000 |
| C | -2.662451000 | -4.865524000 | -2.348636000 |
| H | -0.627960000 | -4.369057000 | -2.915563000 |
| H | -1.854337000 | -3.266374000 | -3.538816000 |
| H | -0.562710000 | -2.163065000 | -1.752424000 |
| H | -0.932132000 | -3.462544000 | -0.617438000 |
| H | -2.961344000 | -1.570719000 | -1.893056000 |
| H | -4.630010000 | -2.719970000 | -0.452847000 |
| H | -3.383291000 | -3.834766000 | 0.114139000  |
| H | -4.732098000 | -4.887806000 | -1.699867000 |
| H | -4.323769000 | -3.564400000 | -2.789732000 |
| H | -2.834974000 | -5.518704000 | -3.214056000 |
| H | -2.334004000 | -5.517873000 | -1.522963000 |

### Intermediate F

|    |              |              |              |
|----|--------------|--------------|--------------|
| La | 0.362028000  | -0.417038000 | 0.048577000  |
| N  | 0.475122000  | 2.366885000  | 0.289230000  |
| N  | 0.783973000  | -1.813657000 | -1.832378000 |
| N  | -0.249880000 | -1.864897000 | 1.847362000  |
| Si | -1.646862000 | -2.900780000 | 1.618242000  |
| Si | 1.684394000  | -3.305222000 | -1.604376000 |
| Si | -0.401230000 | 3.038779000  | 1.712974000  |
| Si | 0.269171000  | 3.269845000  | -1.260965000 |
| Si | 0.626048000  | -1.924999000 | 3.372438000  |
| Si | 0.150719000  | -1.450639000 | -3.424900000 |
| C  | 0.729013000  | 5.096439000  | -1.127456000 |
| H  | 0.658524000  | 5.561262000  | -2.119035000 |
| H  | 0.061072000  | 5.650270000  | -0.456802000 |
| H  | 1.756696000  | 5.195786000  | -0.764410000 |
| C  | 1.309915000  | 2.506651000  | -2.643412000 |
| H  | 1.339627000  | 1.410618000  | -2.618477000 |
| H  | 0.897720000  | 2.793198000  | -3.619636000 |
| H  | 2.338283000  | 2.873254000  | -2.570190000 |
| C  | -1.540755000 | 3.211148000  | -1.859864000 |

|   |              |              |              |
|---|--------------|--------------|--------------|
| H | -2.037993000 | 2.262787000  | -1.626655000 |
| H | -2.138173000 | 4.025636000  | -1.437535000 |
| H | -1.551309000 | 3.327132000  | -2.951308000 |
| C | 0.477071000  | 4.500863000  | 2.528331000  |
| H | 0.834849000  | 5.212851000  | 1.775474000  |
| H | -0.220872000 | 5.029436000  | 3.190012000  |
| H | 1.341389000  | 4.178613000  | 3.116044000  |
| C | -2.122191000 | 3.714928000  | 1.263531000  |
| H | -2.060728000 | 4.699473000  | 0.785564000  |
| H | -2.702671000 | 3.065656000  | 0.601262000  |
| H | -2.687483000 | 3.843427000  | 2.196786000  |
| C | -0.684977000 | 1.692795000  | 3.019055000  |
| H | -1.455072000 | 2.032938000  | 3.724669000  |
| H | -1.015854000 | 0.722874000  | 2.616424000  |
| H | 0.227803000  | 1.506283000  | 3.596231000  |
| C | -1.195661000 | -0.121954000 | -3.245907000 |
| H | -2.010949000 | -0.460797000 | -2.592920000 |
| H | -0.821992000 | 0.833576000  | -2.859160000 |
| H | -1.629845000 | 0.093790000  | -4.230506000 |
| C | 1.449416000  | -0.800708000 | -4.645643000 |
| H | 2.052113000  | 0.004997000  | -4.209482000 |
| H | 2.135485000  | -1.597024000 | -4.956222000 |
| H | 0.961440000  | -0.407852000 | -5.546922000 |
| C | -0.707955000 | -2.921299000 | -4.264212000 |
| H | -1.154331000 | -2.592574000 | -5.211500000 |
| H | -0.015479000 | -3.739834000 | -4.494235000 |
| H | -1.511129000 | -3.322794000 | -3.633737000 |
| C | 3.018834000  | -3.577328000 | -2.925955000 |
| H | 3.682130000  | -2.707800000 | -3.010580000 |
| H | 3.632035000  | -4.447832000 | -2.660755000 |
| H | 2.587468000  | -3.768867000 | -3.916161000 |
| C | 0.612587000  | -4.872184000 | -1.561148000 |
| H | 0.036774000  | -5.014421000 | -2.482307000 |
| H | 1.256560000  | -5.750919000 | -1.426788000 |
| H | -0.095967000 | -4.847691000 | -0.723339000 |
| C | 2.551083000  | -3.247522000 | 0.081487000  |
| H | 1.821909000  | -3.138233000 | 0.896460000  |
| H | 3.090962000  | -4.187671000 | 0.251783000  |
| H | 3.285261000  | -2.434940000 | 0.149643000  |
| C | 2.133045000  | -0.774309000 | 3.291852000  |
| H | 1.954303000  | 0.249417000  | 2.939660000  |
| H | 2.566292000  | -0.702429000 | 4.298242000  |
| H | 2.901687000  | -1.215276000 | 2.643412000  |
| C | 1.386989000  | -3.612038000 | 3.810181000  |
| H | 2.008644000  | -4.007796000 | 2.998353000  |
| H | 2.033069000  | -3.478586000 | 4.688148000  |

|   |              |              |              |
|---|--------------|--------------|--------------|
| H | 0.638072000  | -4.369456000 | 4.063278000  |
| C | -0.454205000 | -1.473225000 | 4.867794000  |
| H | -1.179035000 | -2.270900000 | 5.076470000  |
| H | 0.171592000  | -1.359530000 | 5.762125000  |
| H | -1.009593000 | -0.540655000 | 4.717762000  |
| C | -1.362057000 | -4.713993000 | 2.098716000  |
| H | -0.423305000 | -5.102273000 | 1.685037000  |
| H | -1.327759000 | -4.842024000 | 3.187238000  |
| H | -2.184279000 | -5.333387000 | 1.718660000  |
| C | -3.163177000 | -2.321689000 | 2.620124000  |
| H | -3.065898000 | -2.569766000 | 3.683408000  |
| H | -3.292908000 | -1.232193000 | 2.560439000  |
| H | -4.078986000 | -2.798757000 | 2.246560000  |
| C | -2.217118000 | -2.896134000 | -0.203535000 |
| H | -2.879805000 | -2.051667000 | -0.427505000 |
| H | -1.390923000 | -2.882311000 | -0.927847000 |
| H | -2.789545000 | -3.814855000 | -0.386211000 |
| O | -2.174627000 | 0.304723000  | -0.036646000 |
| C | -3.167947000 | 0.596027000  | 0.611952000  |
| C | -4.663556000 | 0.252819000  | -1.400217000 |
| C | -4.559703000 | 0.572437000  | 0.085049000  |
| C | -5.293359000 | 1.878016000  | 0.433714000  |
| C | -6.751240000 | 1.800309000  | -0.003499000 |
| C | -6.860013000 | 1.484494000  | -1.491227000 |
| C | -6.123634000 | 0.194605000  | -1.835307000 |
| H | -4.150763000 | -0.691098000 | -1.626029000 |
| H | -4.133885000 | 1.036434000  | -1.966506000 |
| H | -5.046437000 | -0.234934000 | 0.672757000  |
| H | -5.209779000 | 2.091826000  | 1.508583000  |
| H | -4.798422000 | 2.709661000  | -0.094660000 |
| H | -7.260963000 | 2.742474000  | 0.231856000  |
| H | -7.259954000 | 1.013689000  | 0.576486000  |
| H | -7.913031000 | 1.416833000  | -1.790823000 |
| H | -6.422937000 | 2.315181000  | -2.067939000 |
| H | -6.185141000 | -0.010418000 | -2.910703000 |
| H | -6.617099000 | -0.650659000 | -1.328899000 |
| O | 2.890931000  | 3.041322000  | 0.043220000  |
| C | 4.162800000  | 2.433714000  | 0.122050000  |
| C | 3.863447000  | 0.888915000  | -0.029181000 |
| O | 2.481627000  | 0.780946000  | 0.364799000  |
| C | 4.795027000  | 2.800042000  | 1.467452000  |
| H | 4.810594000  | 3.893299000  | 1.540539000  |
| H | 4.211378000  | 2.420527000  | 2.312163000  |
| C | 5.043051000  | 2.991990000  | -0.983882000 |
| H | 6.028110000  | 2.507323000  | -0.990852000 |
| H | 4.589021000  | 2.869689000  | -1.972079000 |

|   |              |              |              |
|---|--------------|--------------|--------------|
| H | 5.195194000  | 4.063822000  | -0.814348000 |
| C | 3.977489000  | 0.368350000  | -1.455337000 |
| H | 3.545842000  | -0.641723000 | -1.508612000 |
| H | 3.430306000  | 0.995838000  | -2.163854000 |
| H | 5.023311000  | 0.306854000  | -1.779825000 |
| B | 1.969462000  | 2.185624000  | 0.741970000  |
| H | 2.019114000  | 2.251997000  | 1.971800000  |
| H | 4.532383000  | -1.033296000 | 0.708474000  |
| C | 4.735185000  | 0.031355000  | 0.874087000  |
| H | 4.566219000  | 0.247994000  | 1.932685000  |
| H | 5.796181000  | 0.198796000  | 0.647063000  |
| H | 5.824820000  | 2.435219000  | 1.558864000  |
| H | -3.060552000 | 0.892488000  | 1.680356000  |

### TS5 between F and G

|    |              |              |              |
|----|--------------|--------------|--------------|
| La | 0.721045000  | 0.031033000  | -0.123856000 |
| N  | -1.135140000 | -0.724768000 | 1.740227000  |
| N  | 2.333081000  | 1.699382000  | 0.387424000  |
| N  | 2.019862000  | -1.556246000 | -1.278396000 |
| Si | 1.525470000  | -2.141440000 | -2.851224000 |
| Si | 3.124911000  | 2.077526000  | 1.905112000  |
| Si | -1.676761000 | 0.682545000  | 2.767194000  |
| Si | -0.646523000 | -2.269333000 | 2.579748000  |
| Si | 3.584495000  | -1.985884000 | -0.617278000 |
| Si | 2.617600000  | 2.782549000  | -0.972071000 |
| C  | -2.128356000 | -3.106587000 | 3.395667000  |
| H  | -1.837180000 | -4.085553000 | 3.795797000  |
| H  | -2.498565000 | -2.500472000 | 4.232259000  |
| H  | -2.956914000 | -3.227726000 | 2.692739000  |
| C  | 0.244646000  | -3.457049000 | 1.384534000  |
| H  | 0.634173000  | -3.004873000 | 0.460865000  |
| H  | 1.099716000  | -3.890495000 | 1.919165000  |
| H  | -0.397490000 | -4.286204000 | 1.079462000  |
| C  | 0.656993000  | -2.042599000 | 3.937926000  |
| H  | 1.611612000  | -1.666903000 | 3.553436000  |
| H  | 0.356360000  | -1.424146000 | 4.785629000  |
| H  | 0.847159000  | -3.055516000 | 4.319500000  |
| C  | -3.549258000 | 0.948254000  | 2.735710000  |
| H  | -4.071713000 | 0.053935000  | 3.090811000  |
| H  | -3.785177000 | 1.785325000  | 3.406160000  |
| H  | -3.939742000 | 1.175548000  | 1.738939000  |
| C  | -1.257664000 | 0.552121000  | 4.608100000  |
| H  | -1.677632000 | -0.335184000 | 5.094387000  |
| H  | -0.183912000 | 0.596135000  | 4.814344000  |
| H  | -1.718248000 | 1.429514000  | 5.081728000  |
| C  | -0.812660000 | 2.273656000  | 2.194445000  |

|   |              |              |              |
|---|--------------|--------------|--------------|
| H | -1.347341000 | 3.124486000  | 2.638574000  |
| H | 0.220198000  | 2.321910000  | 2.555916000  |
| H | -0.800569000 | 2.439091000  | 1.110924000  |
| C | 2.177967000  | 1.874417000  | -2.588506000 |
| H | 2.637920000  | 0.878540000  | -2.650108000 |
| H | 1.093941000  | 1.786409000  | -2.743293000 |
| H | 2.559115000  | 2.465707000  | -3.430664000 |
| C | 1.500235000  | 4.313647000  | -0.922514000 |
| H | 0.448952000  | 3.997636000  | -0.933134000 |
| H | 1.665817000  | 4.918086000  | -0.023668000 |
| H | 1.673357000  | 4.950238000  | -1.799573000 |
| C | 4.410558000  | 3.371930000  | -1.162056000 |
| H | 4.487930000  | 3.986017000  | -2.068386000 |
| H | 4.743700000  | 3.988000000  | -0.318664000 |
| H | 5.106588000  | 2.531056000  | -1.265577000 |
| C | 2.938154000  | 3.897831000  | 2.417320000  |
| H | 1.883310000  | 4.195044000  | 2.467514000  |
| H | 3.380849000  | 4.048188000  | 3.410344000  |
| H | 3.446870000  | 4.579741000  | 1.725206000  |
| C | 4.985108000  | 1.702168000  | 1.914312000  |
| H | 5.540574000  | 2.358018000  | 1.235067000  |
| H | 5.387893000  | 1.847072000  | 2.925200000  |
| H | 5.185614000  | 0.665831000  | 1.616212000  |
| C | 2.371650000  | 1.035302000  | 3.321228000  |
| H | 3.088498000  | 0.295011000  | 3.697532000  |
| H | 2.095756000  | 1.684153000  | 4.163086000  |
| H | 1.460350000  | 0.491124000  | 3.039464000  |
| C | 3.517363000  | -1.784350000 | 1.273862000  |
| H | 2.854999000  | -2.525697000 | 1.736744000  |
| H | 4.518975000  | -1.924364000 | 1.700709000  |
| H | 3.198210000  | -0.778862000 | 1.580616000  |
| C | 4.969759000  | -0.856028000 | -1.242556000 |
| H | 4.724040000  | 0.185524000  | -0.994383000 |
| H | 5.928781000  | -1.101351000 | -0.769012000 |
| H | 5.096411000  | -0.928323000 | -2.329185000 |
| C | 4.055415000  | -3.795681000 | -0.926960000 |
| H | 4.206663000  | -4.019278000 | -1.989693000 |
| H | 4.988798000  | -4.034997000 | -0.402289000 |
| H | 3.272250000  | -4.464315000 | -0.547238000 |
| C | 2.867268000  | -1.982145000 | -4.183378000 |
| H | 3.169752000  | -0.936862000 | -4.320974000 |
| H | 3.764714000  | -2.564649000 | -3.942140000 |
| H | 2.483759000  | -2.349707000 | -5.143666000 |
| C | 0.972281000  | -3.954409000 | -2.813442000 |
| H | 1.826189000  | -4.631385000 | -2.694328000 |
| H | 0.294769000  | -4.125979000 | -1.967706000 |



|   |              |              |              |
|---|--------------|--------------|--------------|
| H | 0.448929000  | -4.230763000 | -3.737750000 |
| C | 0.053114000  | -1.094125000 | -3.447396000 |
| H | -0.755634000 | -1.056812000 | -2.705474000 |
| H | 0.358287000  | -0.072506000 | -3.705728000 |
| H | -0.376596000 | -1.543821000 | -4.351972000 |
| O | -0.893582000 | 1.570286000  | -1.230469000 |
| C | -2.100840000 | 1.233223000  | -1.316001000 |
| C | -3.441763000 | 2.649348000  | -2.757032000 |
| C | -3.210288000 | 2.243357000  | -1.287404000 |
| C | -2.948173000 | 3.466598000  | -0.420320000 |
| C | -4.081755000 | 4.478163000  | -0.548110000 |
| C | -4.306080000 | 4.884215000  | -1.999643000 |
| C | -4.574283000 | 3.662609000  | -2.870203000 |
| H | -3.654160000 | 1.757860000  | -3.365794000 |
| H | -2.508249000 | 3.087502000  | -3.145882000 |
| H | -4.124744000 | 1.737731000  | -0.935596000 |
| H | -2.828933000 | 3.159845000  | 0.626640000  |
| H | -1.996219000 | 3.927407000  | -0.727930000 |
| H | -3.869503000 | 5.358590000  | 0.070933000  |
| H | -5.008300000 | 4.033387000  | -0.149210000 |
| H | -5.135311000 | 5.598641000  | -2.076720000 |
| H | -3.408657000 | 5.403216000  | -2.372695000 |
| H | -4.710703000 | 3.953531000  | -3.919406000 |
| H | -5.515372000 | 3.186798000  | -2.550978000 |
| O | -3.469738000 | -1.478348000 | 1.020754000  |
| C | -4.061250000 | -2.085182000 | -0.113731000 |
| C | -2.821593000 | -2.618844000 | -0.913361000 |
| O | -1.762647000 | -1.719362000 | -0.526505000 |
| C | -4.881078000 | -1.048721000 | -0.883040000 |
| H | -5.529949000 | -0.526932000 | -0.168973000 |
| H | -4.260320000 | -0.301146000 | -1.384085000 |
| C | -5.022625000 | -3.163187000 | 0.362688000  |
| H | -5.444791000 | -3.720568000 | -0.483375000 |
| H | -4.543931000 | -3.872650000 | 1.043246000  |
| H | -5.851360000 | -2.690528000 | 0.901969000  |
| C | -2.450418000 | -4.034490000 | -0.498489000 |
| H | -1.477581000 | -4.294852000 | -0.929244000 |
| H | -2.385621000 | -4.133044000 | 0.589524000  |
| H | -3.186045000 | -4.759532000 | -0.866527000 |
| B | -2.218575000 | -0.925137000 | 0.611194000  |
| H | -2.405299000 | 0.308472000  | 0.138180000  |
| H | -2.106231000 | -3.023271000 | -2.906075000 |
| C | -2.997448000 | -2.604061000 | -2.422563000 |
| H | -3.156015000 | -1.596483000 | -2.822351000 |
| H | -3.856778000 | -3.223638000 | -2.710762000 |
| H | -5.514097000 | -1.518616000 | -1.645530000 |

|   |              |             |              |
|---|--------------|-------------|--------------|
| H | -2.349002000 | 0.285541000 | -1.829577000 |
|---|--------------|-------------|--------------|

**Intermediate G**

|    |              |              |              |
|----|--------------|--------------|--------------|
| La | -0.875257000 | -0.119689000 | 0.194724000  |
| N  | 3.355518000  | -0.548758000 | -0.821579000 |
| N  | -1.790907000 | 1.529147000  | -1.286595000 |
| N  | -2.198359000 | -2.117623000 | 0.158572000  |
| Si | -3.140952000 | -2.836791000 | 1.453651000  |
| Si | -0.642977000 | 2.460770000  | -2.192544000 |
| Si | 4.658676000  | 0.703664000  | -0.759217000 |
| Si | 3.099792000  | -1.530074000 | -2.300905000 |
| Si | -2.246578000 | -2.792803000 | -1.452943000 |
| Si | -3.515897000 | 1.783139000  | -1.374622000 |
| C  | 4.766905000  | -2.093280000 | -2.989959000 |
| H  | 4.592077000  | -2.759075000 | -3.844233000 |
| H  | 5.398673000  | -1.269762000 | -3.339354000 |
| H  | 5.327615000  | -2.658508000 | -2.236120000 |
| C  | 2.164822000  | -3.115450000 | -1.866220000 |
| H  | 1.314663000  | -2.960192000 | -1.194321000 |
| H  | 1.785142000  | -3.577325000 | -2.786868000 |
| H  | 2.841573000  | -3.834795000 | -1.388548000 |
| C  | 2.197082000  | -0.560990000 | -3.642663000 |
| H  | 1.241506000  | -0.152700000 | -3.298370000 |
| H  | 2.800602000  | 0.276337000  | -4.011424000 |
| H  | 1.983695000  | -1.223463000 | -4.491387000 |
| C  | 6.329136000  | -0.067699000 | -0.349780000 |
| H  | 6.665560000  | -0.755702000 | -1.132857000 |
| H  | 7.090172000  | 0.714128000  | -0.238989000 |
| H  | 6.266128000  | -0.620861000 | 0.593044000  |
| C  | 4.767162000  | 1.594243000  | -2.421423000 |
| H  | 5.092257000  | 0.948587000  | -3.244271000 |
| H  | 3.809743000  | 2.049597000  | -2.698875000 |
| H  | 5.504205000  | 2.401779000  | -2.331752000 |
| C  | 4.207696000  | 1.975847000  | 0.559848000  |
| H  | 4.879446000  | 2.839715000  | 0.488519000  |
| H  | 3.181368000  | 2.340823000  | 0.426128000  |
| H  | 4.299238000  | 1.554896000  | 1.566091000  |
| C  | -4.329476000 | 0.720529000  | -0.027822000 |
| H  | -4.101603000 | -0.349164000 | -0.128907000 |
| H  | -3.995293000 | 1.050041000  | 0.968446000  |
| H  | -5.420079000 | 0.837223000  | -0.058245000 |
| C  | -4.078496000 | 3.562861000  | -1.028586000 |
| H  | -3.698623000 | 3.913329000  | -0.060861000 |
| H  | -3.745974000 | 4.268697000  | -1.798022000 |
| H  | -5.174983000 | 3.599329000  | -0.993709000 |
| C  | -4.208991000 | 1.309573000  | -3.077542000 |

|   |              |              |              |
|---|--------------|--------------|--------------|
| H | -5.305874000 | 1.291897000  | -3.079489000 |
| H | -3.886728000 | 2.037287000  | -3.834164000 |
| H | -3.848905000 | 0.322562000  | -3.394693000 |
| C | -0.890256000 | 4.340456000  | -2.178245000 |
| H | -1.095649000 | 4.722834000  | -1.171495000 |
| H | 0.011446000  | 4.839501000  | -2.556814000 |
| H | -1.725234000 | 4.632980000  | -2.826837000 |
| C | -0.512775000 | 1.985265000  | -4.028438000 |
| H | -1.366039000 | 2.393024000  | -4.584851000 |
| H | 0.402795000  | 2.393588000  | -4.476962000 |
| H | -0.511256000 | 0.899576000  | -4.181978000 |
| C | 1.053394000  | 2.146334000  | -1.363169000 |
| H | 1.827128000  | 2.748606000  | -1.858586000 |
| H | 1.029446000  | 2.476645000  | -0.312706000 |
| H | 1.430321000  | 1.110797000  | -1.396222000 |
| C | -1.089293000 | -1.735584000 | -2.554587000 |
| H | -0.057512000 | -1.649454000 | -2.181078000 |
| H | -0.996731000 | -2.216619000 | -3.537170000 |
| H | -1.493415000 | -0.726242000 | -2.726846000 |
| C | -3.928020000 | -2.705394000 | -2.325340000 |
| H | -4.380470000 | -1.712742000 | -2.203810000 |
| H | -3.801890000 | -2.889248000 | -3.400214000 |
| H | -4.638215000 | -3.444399000 | -1.939050000 |
| C | -1.633554000 | -4.584998000 | -1.552890000 |
| H | -2.352248000 | -5.278475000 | -1.098319000 |
| H | -1.494756000 | -4.889444000 | -2.598124000 |
| H | -0.675854000 | -4.705421000 | -1.030823000 |
| C | -4.901591000 | -3.327922000 | 0.938128000  |
| H | -5.447972000 | -2.493208000 | 0.483547000  |
| H | -4.902308000 | -4.163600000 | 0.226974000  |
| H | -5.459749000 | -3.652849000 | 1.825631000  |
| C | -2.376039000 | -4.450704000 | 2.117786000  |
| H | -2.302887000 | -5.201616000 | 1.321434000  |
| H | -1.373148000 | -4.318732000 | 2.540406000  |
| H | -3.017031000 | -4.865493000 | 2.906589000  |
| C | -3.324021000 | -1.619915000 | 2.896213000  |
| H | -2.373494000 | -1.188700000 | 3.232970000  |
| H | -3.975625000 | -0.784232000 | 2.610164000  |
| H | -3.790920000 | -2.129484000 | 3.748701000  |
| O | -1.012515000 | 0.862126000  | 2.172853000  |
| C | -1.230872000 | 1.669874000  | 3.272767000  |
| C | -1.586464000 | 3.779004000  | 1.926014000  |
| C | -0.789821000 | 3.114820000  | 3.047522000  |
| C | 0.710225000  | 3.217119000  | 2.780263000  |
| C | 1.156732000  | 4.652394000  | 2.529475000  |
| C | 0.358169000  | 5.285187000  | 1.395514000  |

|   |              |              |             |
|---|--------------|--------------|-------------|
| C | -1.138653000 | 5.215572000  | 1.680202000 |
| H | -2.659925000 | 3.744319000  | 2.170881000 |
| H | -1.466594000 | 3.193312000  | 0.997506000 |
| H | -0.999781000 | 3.663801000  | 3.985309000 |
| H | 1.269845000  | 2.778490000  | 3.621402000 |
| H | 0.951666000  | 2.602394000  | 1.894578000 |
| H | 2.233078000  | 4.686198000  | 2.311192000 |
| H | 1.005644000  | 5.242826000  | 3.448206000 |
| H | 0.672979000  | 6.324667000  | 1.234738000 |
| H | 0.575418000  | 4.746290000  | 0.456648000 |
| H | -1.711787000 | 5.659754000  | 0.853321000 |
| H | -1.360177000 | 5.825836000  | 2.571466000 |
| O | 3.691057000  | -1.029318000 | 1.565997000 |
| C | 2.871735000  | -1.344776000 | 2.704147000 |
| C | 1.666351000  | -2.067703000 | 2.048445000 |
| O | 1.566766000  | -1.354006000 | 0.762796000 |
| C | 2.482017000  | -0.035325000 | 3.371863000 |
| H | 3.392967000  | 0.529031000  | 3.602623000 |
| H | 1.850088000  | 0.583323000  | 2.721044000 |
| C | 3.673898000  | -2.207777000 | 3.655196000 |
| H | 3.048130000  | -2.553742000 | 4.487170000 |
| H | 4.100296000  | -3.078027000 | 3.148198000 |
| H | 4.498903000  | -1.621902000 | 4.074394000 |
| C | 1.932163000  | -3.524853000 | 1.708650000 |
| H | 1.115891000  | -3.895053000 | 1.075086000 |
| H | 2.877862000  | -3.655985000 | 1.169191000 |
| H | 1.961519000  | -4.140046000 | 2.614939000 |
| B | 2.887717000  | -0.966835000 | 0.453049000 |
| H | -0.685852000 | 1.268969000  | 4.155736000 |
| H | -0.426947000 | -2.447334000 | 2.257803000 |
| C | 0.374960000  | -1.953368000 | 2.819573000 |
| H | 0.079118000  | -0.917129000 | 3.016053000 |
| H | 0.469930000  | -2.479500000 | 3.778014000 |
| H | 1.940073000  | -0.204225000 | 4.309839000 |
| H | -2.305474000 | 1.667427000  | 3.545356000 |

**TS6 between G and H**

|    |              |              |              |
|----|--------------|--------------|--------------|
| La | -0.779641000 | -0.220595000 | -0.398873000 |
| N  | 3.352064000  | -0.380548000 | -0.369731000 |
| N  | -1.521348000 | 1.826446000  | -1.326056000 |
| N  | -2.677495000 | -1.528529000 | 0.270555000  |
| Si | -3.415750000 | -1.955090000 | 1.806804000  |
| Si | -0.391815000 | 2.519989000  | -2.463195000 |
| Si | 4.200770000  | 0.818760000  | 0.663475000  |
| Si | 4.036753000  | -0.715454000 | -1.985748000 |
| Si | -3.433778000 | -2.070616000 | -1.212194000 |
| Si | -3.071702000 | 2.586939000  | -1.024601000 |
| C  | 5.555332000  | -1.843498000 | -1.867941000 |
| H  | 5.956900000  | -2.016225000 | -2.874861000 |
| H  | 6.352684000  | -1.408192000 | -1.257511000 |
| H  | 5.301795000  | -2.821492000 | -1.441773000 |
| C  | 2.846557000  | -1.560786000 | -3.209763000 |
| H  | 2.704466000  | -0.925449000 | -4.091630000 |
| H  | 3.282474000  | -2.508471000 | -3.549833000 |
| H  | 1.867344000  | -1.778059000 | -2.777033000 |
| C  | 4.596753000  | 0.882930000  | -2.839656000 |
| H  | 3.775283000  | 1.601251000  | -2.936939000 |
| H  | 5.428520000  | 1.390080000  | -2.342428000 |
| H  | 4.931131000  | 0.621042000  | -3.851874000 |
| C  | 4.063254000  | 0.467424000  | 2.515300000  |
| H  | 4.569498000  | -0.474138000 | 2.752562000  |
| H  | 4.578887000  | 1.277731000  | 3.048313000  |
| H  | 3.043245000  | 0.397656000  | 2.896098000  |
| C  | 6.083541000  | 0.795695000  | 0.410154000  |
| H  | 6.501797000  | -0.167107000 | 0.727519000  |
| H  | 6.432443000  | 1.003303000  | -0.605021000 |
| H  | 6.509378000  | 1.566207000  | 1.066231000  |
| C  | 3.560307000  | 2.549102000  | 0.248952000  |
| H  | 2.466278000  | 2.552575000  | 0.319885000  |
| H  | 3.959127000  | 3.297912000  | 0.945378000  |
| H  | 3.839894000  | 2.848750000  | -0.768306000 |
| C  | -3.848371000 | 1.836560000  | 0.535361000  |
| H  | -3.864371000 | 0.739155000  | 0.501235000  |
| H  | -3.297940000 | 2.143042000  | 1.436013000  |
| H  | -4.882713000 | 2.185808000  | 0.649927000  |
| C  | -2.922220000 | 4.452923000  | -0.720335000 |
| H  | -2.214648000 | 4.657007000  | 0.093784000  |
| H  | -2.577843000 | 4.991600000  | -1.611981000 |
| H  | -3.895740000 | 4.871446000  | -0.436411000 |
| C  | -4.274906000 | 2.343876000  | -2.475815000 |
| H  | -5.310217000 | 2.546216000  | -2.173591000 |
| H  | -4.030760000 | 3.015883000  | -3.307083000 |

|   |              |              |              |
|---|--------------|--------------|--------------|
| H | -4.228674000 | 1.316485000  | -2.858950000 |
| C | 0.515011000  | 4.084584000  | -1.898074000 |
| H | 1.090310000  | 3.915832000  | -0.979464000 |
| H | 1.220169000  | 4.402421000  | -2.677387000 |
| H | -0.177306000 | 4.914175000  | -1.713404000 |
| C | -1.160324000 | 2.883994000  | -4.157320000 |
| H | -1.870448000 | 3.718731000  | -4.112743000 |
| H | -0.380947000 | 3.151610000  | -4.881834000 |
| H | -1.697635000 | 2.007218000  | -4.540248000 |
| C | 0.946110000  | 1.191118000  | -2.747850000 |
| H | 0.543090000  | 0.243115000  | -3.140629000 |
| H | 1.636394000  | 1.546684000  | -3.523397000 |
| H | 1.568775000  | 0.985137000  | -1.860680000 |
| C | -2.265487000 | -1.591309000 | -2.675990000 |
| H | -1.253201000 | -2.031198000 | -2.641068000 |
| H | -2.716814000 | -2.013910000 | -3.582145000 |
| H | -2.200608000 | -0.506684000 | -2.867796000 |
| C | -5.097322000 | -1.265239000 | -1.631615000 |
| H | -5.102224000 | -0.195854000 | -1.389774000 |
| H | -5.311964000 | -1.371463000 | -2.702970000 |
| H | -5.918975000 | -1.734294000 | -1.078905000 |
| C | -3.680197000 | -3.945176000 | -1.344643000 |
| H | -4.457132000 | -4.290770000 | -0.651542000 |
| H | -4.005491000 | -4.210010000 | -2.358703000 |
| H | -2.761289000 | -4.500241000 | -1.122738000 |
| C | -5.300177000 | -1.715166000 | 1.822108000  |
| H | -5.591347000 | -0.693204000 | 1.552524000  |
| H | -5.806094000 | -2.404978000 | 1.135021000  |
| H | -5.682644000 | -1.920464000 | 2.830085000  |
| C | -3.144011000 | -3.774844000 | 2.282706000  |
| H | -3.594868000 | -4.453033000 | 1.548403000  |
| H | -2.081699000 | -4.031094000 | 2.363749000  |
| H | -3.611549000 | -3.977276000 | 3.254764000  |
| C | -2.729234000 | -0.897751000 | 3.224958000  |
| H | -1.681393000 | -1.120546000 | 3.462890000  |
| H | -2.817838000 | 0.176854000  | 3.015115000  |
| H | -3.316359000 | -1.102652000 | 4.129296000  |
| O | 1.087332000  | 0.298975000  | 0.917251000  |
| C | 0.596013000  | 0.556432000  | 2.190491000  |
| C | 0.402800000  | 2.179312000  | 4.105003000  |
| C | 0.762317000  | 2.003286000  | 2.633266000  |
| C | -0.060209000 | 2.956400000  | 1.773978000  |
| C | 0.147032000  | 4.404596000  | 2.195330000  |
| C | -0.203283000 | 4.590851000  | 3.667992000  |
| C | 0.585356000  | 3.627243000  | 4.549993000  |
| H | 1.015099000  | 1.506924000  | 4.724616000  |

|   |              |              |              |
|---|--------------|--------------|--------------|
| H | -0.648674000 | 1.873676000  | 4.255841000  |
| H | 1.828193000  | 2.263384000  | 2.505763000  |
| H | 0.171025000  | 2.819697000  | 0.708440000  |
| H | -1.131871000 | 2.697216000  | 1.888534000  |
| H | -0.447827000 | 5.079980000  | 1.564446000  |
| H | 1.203434000  | 4.675269000  | 2.027797000  |
| H | -0.026550000 | 5.627852000  | 3.981479000  |
| H | -1.281168000 | 4.402982000  | 3.802958000  |
| H | 0.295924000  | 3.744957000  | 5.602266000  |
| H | 1.655904000  | 3.882239000  | 4.490901000  |
| O | 2.592654000  | -1.932421000 | 1.437262000  |
| C | 1.752516000  | -3.080799000 | 1.485807000  |
| C | 1.338738000  | -3.268761000 | -0.005441000 |
| O | 1.326124000  | -1.900053000 | -0.488834000 |
| C | 0.570008000  | -2.816627000 | 2.407113000  |
| H | 0.947763000  | -2.450465000 | 3.368579000  |
| H | -0.122665000 | -2.063914000 | 2.012828000  |
| C | 2.556863000  | -4.236285000 | 2.056911000  |
| H | 1.992725000  | -5.176352000 | 2.002490000  |
| H | 3.508164000  | -4.361592000 | 1.533245000  |
| H | 2.780011000  | -4.036752000 | 3.110741000  |
| C | 2.386406000  | -4.026216000 | -0.808857000 |
| H | 2.143542000  | -3.958790000 | -1.874833000 |
| H | 3.387321000  | -3.604256000 | -0.658460000 |
| H | 2.412706000  | -5.085661000 | -0.530559000 |
| B | 2.338541000  | -1.194631000 | 0.279975000  |
| H | 1.043200000  | -0.126944000 | 2.938127000  |
| H | -0.204033000 | -4.009737000 | -1.305718000 |
| C | -0.020144000 | -3.900313000 | -0.227669000 |
| H | -0.846707000 | -3.320370000 | 0.204736000  |
| H | -0.050771000 | -4.906041000 | 0.211958000  |
| H | -0.003096000 | -3.732993000 | 2.592400000  |
| H | -0.512275000 | 0.340308000  | 2.260061000  |

### Intermediate H

|    |              |              |              |
|----|--------------|--------------|--------------|
| La | -0.577272000 | -0.174754000 | 0.005814000  |
| N  | -0.738736000 | 0.431947000  | 2.349592000  |
| N  | 0.282923000  | -2.413391000 | -0.266423000 |
| N  | -2.648022000 | 0.011145000  | -1.207631000 |
| Si | -3.054820000 | 1.222632000  | -2.405401000 |
| Si | 0.609939000  | -3.573584000 | 1.017813000  |
| Si | 0.749532000  | 0.413049000  | 3.277062000  |
| Si | -2.259377000 | 0.902744000  | 3.102988000  |
| Si | -3.836054000 | -1.227847000 | -0.842302000 |
| Si | 0.340340000  | -2.964203000 | -1.930384000 |
| C  | -2.075127000 | 1.966566000  | 4.666364000  |

|   |              |              |              |
|---|--------------|--------------|--------------|
| H | -3.079489000 | 2.265262000  | 4.993668000  |
| H | -1.610894000 | 1.417648000  | 5.494839000  |
| H | -1.494777000 | 2.879717000  | 4.492427000  |
| C | -3.250252000 | 1.954018000  | 1.872398000  |
| H | -3.305012000 | 1.494667000  | 0.874690000  |
| H | -4.279068000 | 2.105339000  | 2.225091000  |
| H | -2.789685000 | 2.946837000  | 1.769428000  |
| C | -3.356732000 | -0.554328000 | 3.641363000  |
| H | -3.908107000 | -1.002397000 | 2.806611000  |
| H | -2.768584000 | -1.347374000 | 4.120039000  |
| H | -4.097609000 | -0.198420000 | 4.368598000  |
| C | 1.177481000  | 1.954590000  | 4.315086000  |
| H | 0.672602000  | 1.936992000  | 5.286707000  |
| H | 2.258879000  | 1.929905000  | 4.508781000  |
| H | 0.945837000  | 2.909925000  | 3.834878000  |
| C | 0.936357000  | -1.002644000 | 4.530223000  |
| H | 0.017283000  | -1.140402000 | 5.114994000  |
| H | 1.175249000  | -1.960860000 | 4.057178000  |
| H | 1.745299000  | -0.758615000 | 5.230858000  |
| C | 2.197720000  | 0.262189000  | 2.041618000  |
| H | 3.117218000  | 0.040358000  | 2.600556000  |
| H | 2.087500000  | -0.549024000 | 1.308385000  |
| H | 2.374156000  | 1.201169000  | 1.497669000  |
| C | -0.080572000 | -1.519285000 | -3.103368000 |
| H | -1.125611000 | -1.195329000 | -2.994491000 |
| H | 0.567971000  | -0.639468000 | -2.991003000 |
| H | 0.045661000  | -1.876256000 | -4.133927000 |
| C | 2.035405000  | -3.616540000 | -2.492325000 |
| H | 2.447391000  | -4.354692000 | -1.792988000 |
| H | 1.939617000  | -4.101916000 | -3.472223000 |
| H | 2.769535000  | -2.807958000 | -2.589602000 |
| C | -0.915271000 | -4.318926000 | -2.387552000 |
| H | -1.081058000 | -4.307002000 | -3.473206000 |
| H | -0.562897000 | -5.319310000 | -2.115401000 |
| H | -1.886431000 | -4.160078000 | -1.902592000 |
| C | 2.398601000  | -3.504733000 | 1.665532000  |
| H | 2.671462000  | -2.532062000 | 2.092912000  |
| H | 2.527360000  | -4.259991000 | 2.452194000  |
| H | 3.112328000  | -3.733307000 | 0.862935000  |
| C | 0.357728000  | -5.392544000 | 0.521311000  |
| H | 1.017664000  | -5.722045000 | -0.290002000 |
| H | 0.576567000  | -6.016118000 | 1.398096000  |
| H | -0.678593000 | -5.591750000 | 0.223797000  |
| C | -0.553952000 | -3.335754000 | 2.500872000  |
| H | -1.535064000 | -3.774674000 | 2.283801000  |
| H | -0.143461000 | -3.851038000 | 3.379255000  |



|   |              |              |              |
|---|--------------|--------------|--------------|
| H | -0.709879000 | -2.283837000 | 2.771039000  |
| C | -3.105344000 | -2.372400000 | 0.486006000  |
| H | -2.650080000 | -1.857821000 | 1.343914000  |
| H | -3.908873000 | -2.990790000 | 0.908098000  |
| H | -2.349176000 | -3.045209000 | 0.062635000  |
| C | -4.267516000 | -2.379923000 | -2.290439000 |
| H | -3.373305000 | -2.629244000 | -2.875920000 |
| H | -4.682835000 | -3.318307000 | -1.899613000 |
| H | -5.005666000 | -1.944883000 | -2.972279000 |
| C | -5.469244000 | -0.533090000 | -0.170407000 |
| H | -5.970532000 | 0.108136000  | -0.906435000 |
| H | -6.155738000 | -1.353274000 | 0.075589000  |
| H | -5.309398000 | 0.060762000  | 0.738110000  |
| C | -4.145753000 | 0.597836000  | -3.829672000 |
| H | -3.698817000 | -0.266537000 | -4.335269000 |
| H | -5.153981000 | 0.318493000  | -3.501769000 |
| H | -4.251784000 | 1.403021000  | -4.568579000 |
| C | -3.987322000 | 2.712191000  | -1.683138000 |
| H | -4.955709000 | 2.396714000  | -1.274709000 |
| H | -3.438832000 | 3.198643000  | -0.869496000 |
| H | -4.178117000 | 3.458654000  | -2.465464000 |
| C | -1.489715000 | 1.870325000  | -3.277173000 |
| H | -0.688440000 | 2.135012000  | -2.578995000 |
| H | -1.100856000 | 1.118540000  | -3.974864000 |
| H | -1.739092000 | 2.770000000  | -3.856546000 |
| O | 1.847790000  | 0.746874000  | -1.350914000 |
| C | 3.062858000  | 0.396436000  | -2.045153000 |
| O | 2.446319000  | 3.114526000  | -1.226531000 |
| C | 1.623650000  | 4.297586000  | -1.032207000 |
| C | 0.446217000  | 3.773361000  | -0.140754000 |
| O | 0.390279000  | 2.361543000  | -0.517023000 |
| C | 1.182297000  | 4.748160000  | -2.415220000 |
| H | 2.073159000  | 4.920144000  | -3.028116000 |
| H | 0.567283000  | 3.990914000  | -2.916280000 |
| C | 2.466704000  | 5.368975000  | -0.376533000 |
| H | 1.854245000  | 6.249526000  | -0.146528000 |
| H | 2.931852000  | 5.014254000  | 0.546907000  |
| H | 3.262472000  | 5.680063000  | -1.061243000 |
| C | 0.733240000  | 3.804986000  | 1.346172000  |
| H | -0.028309000 | 3.200295000  | 1.857269000  |
| H | 1.714210000  | 3.373125000  | 1.580537000  |
| H | 0.699273000  | 4.826811000  | 1.740755000  |
| B | 1.622869000  | 2.052467000  | -1.055746000 |
| H | -1.653243000 | 3.961163000  | 0.225957000  |
| C | -0.895324000 | 4.404563000  | -0.430759000 |
| H | -1.214167000 | 4.252287000  | -1.466316000 |

|   |              |              |              |
|---|--------------|--------------|--------------|
| H | -0.859526000 | 5.481745000  | -0.225916000 |
| H | 0.611980000  | 5.682360000  | -2.368869000 |
| H | 3.299816000  | 1.210835000  | -2.743472000 |
| C | 5.556306000  | 0.447621000  | -1.762046000 |
| C | 4.216842000  | 0.149396000  | -1.089903000 |
| C | 4.216874000  | -1.273778000 | -0.537597000 |
| C | 5.352592000  | -1.481234000 | 0.454450000  |
| C | 6.696277000  | -1.176210000 | -0.199763000 |
| C | 6.715143000  | 0.228284000  | -0.794801000 |
| H | 5.562408000  | 1.479674000  | -2.142052000 |
| H | 5.673751000  | -0.214064000 | -2.637787000 |
| H | 4.102610000  | 0.857901000  | -0.248745000 |
| H | 3.240721000  | -1.529176000 | -0.099994000 |
| H | 4.355750000  | -1.968258000 | -1.385035000 |
| H | 5.334369000  | -2.506279000 | 0.846571000  |
| H | 5.204755000  | -0.814561000 | 1.320560000  |
| H | 7.515168000  | -1.295034000 | 0.521115000  |
| H | 6.877343000  | -1.909961000 | -1.001855000 |
| H | 7.671415000  | 0.422454000  | -1.297007000 |
| H | 6.636443000  | 0.965133000  | 0.021012000  |
| H | 2.831146000  | -0.503212000 | -2.631975000 |

**Aldehyde borylated product**

|   |              |              |              |
|---|--------------|--------------|--------------|
| O | 1.931089000  | -1.266580000 | -0.346787000 |
| C | 3.222773000  | -0.635246000 | -0.317077000 |
| B | 1.011212000  | -0.254496000 | -0.237075000 |
| C | 2.932976000  | 0.686103000  | 0.461232000  |
| O | 1.565715000  | 0.959696000  | 0.099975000  |
| C | 3.635415000  | -0.391924000 | -1.762071000 |
| H | 3.602111000  | -1.344796000 | -2.300697000 |
| H | 2.949312000  | 0.302485000  | -2.260827000 |
| H | 4.652517000  | 0.010798000  | -1.833539000 |
| C | 4.211239000  | -1.565202000 | 0.354700000  |
| H | 5.185587000  | -1.074316000 | 0.474459000  |
| H | 3.857440000  | -1.889924000 | 1.337104000  |
| H | 4.355003000  | -2.458092000 | -0.263407000 |
| C | 3.795106000  | 1.864857000  | 0.061443000  |
| H | 3.664226000  | 2.122573000  | -0.993192000 |
| H | 3.522844000  | 2.741382000  | 0.659652000  |
| H | 4.855587000  | 1.647279000  | 0.241960000  |
| C | 2.965744000  | 0.503165000  | 1.971815000  |
| H | 2.538717000  | 1.394796000  | 2.443283000  |
| H | 2.369527000  | -0.363287000 | 2.280510000  |
| H | 3.988592000  | 0.372886000  | 2.343846000  |
| O | -0.307933000 | -0.453494000 | -0.445898000 |
| C | -1.211514000 | 0.623447000  | -0.265859000 |

|   |              |              |              |
|---|--------------|--------------|--------------|
| C | -2.989192000 | -0.939116000 | 0.586617000  |
| C | -4.429706000 | -1.409813000 | 0.427212000  |
| C | -5.402866000 | -0.238728000 | 0.506321000  |
| C | -5.053974000 | 0.830405000  | -0.523401000 |
| C | -3.611429000 | 1.297080000  | -0.364881000 |
| C | -2.630423000 | 0.129859000  | -0.442716000 |
| H | -2.287445000 | -1.778060000 | 0.508466000  |
| H | -2.855829000 | -0.507295000 | 1.594736000  |
| H | -4.671820000 | -2.165046000 | 1.186081000  |
| H | -4.540580000 | -1.905297000 | -0.551045000 |
| H | -6.436084000 | -0.582952000 | 0.367961000  |
| H | -5.352542000 | 0.203469000  | 1.514879000  |
| H | -5.741866000 | 1.682275000  | -0.445545000 |
| H | -5.186673000 | 0.413098000  | -1.534731000 |
| H | -3.363515000 | 2.053215000  | -1.123873000 |
| H | -3.495513000 | 1.790413000  | 0.616222000  |
| H | -2.703632000 | -0.322251000 | -1.448092000 |
| H | -1.088355000 | 1.057833000  | 0.741251000  |
| H | -0.989536000 | 1.425009000  | -0.988414000 |

**TS7 between E and I (aldehyde off cycle)**

|    |              |              |              |
|----|--------------|--------------|--------------|
| La | -0.478710000 | -0.008727000 | -0.172959000 |
| N  | 1.781396000  | 0.289354000  | 0.995422000  |
| N  | -1.957030000 | -1.893575000 | -0.139369000 |
| N  | -1.729413000 | 1.989292000  | -0.304997000 |
| Si | -1.347559000 | 3.265844000  | -1.434929000 |
| Si | -2.675175000 | -2.920842000 | 1.091351000  |
| Si | 2.085971000  | -1.153316000 | 1.969167000  |
| Si | 2.097670000  | 1.876114000  | 1.717907000  |
| Si | -3.188522000 | 2.030741000  | 0.664487000  |
| Si | -2.285333000 | -2.270944000 | -1.820214000 |
| C  | 2.567278000  | 3.179028000  | 0.418497000  |
| H  | 2.639727000  | 4.150114000  | 0.926205000  |
| H  | 3.540121000  | 2.981245000  | -0.047522000 |
| H  | 1.819569000  | 3.292905000  | -0.376449000 |
| C  | 0.551709000  | 2.553122000  | 2.589381000  |
| H  | 0.240305000  | 1.908865000  | 3.421648000  |
| H  | 0.759243000  | 3.550449000  | 2.999428000  |
| H  | -0.289628000 | 2.655092000  | 1.887624000  |
| C  | 3.504855000  | 1.914587000  | 2.992922000  |
| H  | 3.330191000  | 1.252886000  | 3.849059000  |
| H  | 4.474420000  | 1.653400000  | 2.552097000  |
| H  | 3.586346000  | 2.937704000  | 3.381930000  |
| C  | 3.885328000  | -1.581370000 | 2.390313000  |
| H  | 4.412870000  | -0.760153000 | 2.887525000  |
| H  | 3.874979000  | -2.434227000 | 3.081659000  |

|   |              |              |              |
|---|--------------|--------------|--------------|
| H | 4.467473000  | -1.881041000 | 1.511694000  |
| C | 1.185221000  | -1.021508000 | 3.638245000  |
| H | 1.669931000  | -0.287383000 | 4.293766000  |
| H | 0.137116000  | -0.715843000 | 3.519749000  |
| H | 1.187443000  | -1.986602000 | 4.160789000  |
| C | 1.426536000  | -2.681851000 | 1.038858000  |
| H | 1.565784000  | -3.559690000 | 1.684440000  |
| H | 0.361719000  | -2.671310000 | 0.761762000  |
| H | 1.993361000  | -2.861374000 | 0.116553000  |
| C | -1.773171000 | -0.751740000 | -2.882815000 |
| H | -2.232496000 | 0.195651000  | -2.557638000 |
| H | -0.688702000 | -0.618245000 | -3.017855000 |
| H | -2.158666000 | -0.940247000 | -3.892636000 |
| C | -1.243090000 | -3.702169000 | -2.494510000 |
| H | -0.179842000 | -3.520436000 | -2.288753000 |
| H | -1.513276000 | -4.660290000 | -2.037318000 |
| H | -1.366117000 | -3.796264000 | -3.580890000 |
| C | -4.104854000 | -2.587795000 | -2.239435000 |
| H | -4.213818000 | -2.727757000 | -3.322354000 |
| H | -4.495171000 | -3.487433000 | -1.749570000 |
| H | -4.734212000 | -1.740383000 | -1.941683000 |
| C | -2.499105000 | -4.768519000 | 0.687454000  |
| H | -1.444045000 | -5.031590000 | 0.537274000  |
| H | -2.882159000 | -5.370642000 | 1.520973000  |
| H | -3.051847000 | -5.063114000 | -0.212856000 |
| C | -4.520524000 | -2.561915000 | 1.354821000  |
| H | -5.102591000 | -2.726958000 | 0.441055000  |
| H | -4.925727000 | -3.217871000 | 2.135857000  |
| H | -4.684624000 | -1.523801000 | 1.669427000  |
| C | -1.841961000 | -2.701268000 | 2.781914000  |
| H | -2.356174000 | -3.349374000 | 3.503481000  |
| H | -0.787673000 | -3.001252000 | 2.767228000  |
| H | -1.905722000 | -1.678542000 | 3.173101000  |
| C | -2.886488000 | 0.899542000  | 2.166402000  |
| H | -2.046596000 | 1.247296000  | 2.783158000  |
| H | -3.774455000 | 0.867868000  | 2.810344000  |
| H | -2.709239000 | -0.140529000 | 1.858217000  |
| C | -4.681033000 | 1.321448000  | -0.260022000 |
| H | -4.451125000 | 0.297844000  | -0.587426000 |
| H | -5.569696000 | 1.277722000  | 0.381921000  |
| H | -4.928918000 | 1.914599000  | -1.148103000 |
| C | -3.610077000 | 3.747958000  | 1.341813000  |
| H | -3.860845000 | 4.463076000  | 0.549389000  |
| H | -4.474736000 | 3.682742000  | 2.013771000  |
| H | -2.767481000 | 4.155873000  | 1.913748000  |
| C | -2.799567000 | 3.714290000  | -2.570241000 |

|   |              |              |              |
|---|--------------|--------------|--------------|
| H | -3.148179000 | 2.832822000  | -3.122871000 |
| H | -3.652426000 | 4.119192000  | -2.011917000 |
| H | -2.493688000 | 4.472421000  | -3.302037000 |
| C | -0.762544000 | 4.862413000  | -0.594621000 |
| H | -1.590873000 | 5.364379000  | -0.081197000 |
| H | 0.017201000  | 4.662791000  | 0.150643000  |
| H | -0.353846000 | 5.562292000  | -1.334412000 |
| C | 0.039028000  | 2.659979000  | -2.592703000 |
| H | 0.919408000  | 2.254945000  | -2.075658000 |
| H | -0.324157000 | 1.889955000  | -3.285959000 |
| H | 0.397513000  | 3.500341000  | -3.200465000 |
| O | 1.426522000  | -0.424347000 | -1.693195000 |
| C | 2.444524000  | 0.102241000  | -1.177974000 |
| H | 2.526215000  | 1.204994000  | -1.148973000 |
| C | 5.497169000  | -1.633653000 | -2.657485000 |
| C | 4.148790000  | -0.927359000 | -2.591304000 |
| C | 3.756839000  | -0.622500000 | -1.132866000 |
| C | 4.853071000  | 0.185620000  | -0.448153000 |
| C | 6.204038000  | -0.514885000 | -0.525965000 |
| C | 6.586369000  | -0.819857000 | -1.969353000 |
| H | 5.762896000  | -1.832276000 | -3.703442000 |
| H | 5.411789000  | -2.615442000 | -2.164429000 |
| H | 3.360106000  | -1.525623000 | -3.061969000 |
| H | 4.204439000  | 0.022606000  | -3.150138000 |
| H | 3.612764000  | -1.587683000 | -0.620897000 |
| H | 4.574372000  | 0.385977000  | 0.594243000  |
| H | 4.927086000  | 1.165144000  | -0.952333000 |
| H | 6.974155000  | 0.097718000  | -0.040860000 |
| H | 6.157066000  | -1.458757000 | 0.042207000  |
| H | 7.546593000  | -1.349231000 | -2.010276000 |
| H | 6.727411000  | 0.127792000  | -2.514033000 |

**Intermediate I (aldehyde off cycle)**

|    |              |              |              |
|----|--------------|--------------|--------------|
| La | -0.601483000 | -0.011455000 | 0.096536000  |
| N  | 2.101839000  | 0.210088000  | 0.880427000  |
| N  | -2.000991000 | -1.915164000 | -0.197761000 |
| N  | -1.728622000 | 2.039954000  | -0.290093000 |
| Si | -1.241231000 | 3.305360000  | -1.398477000 |
| Si | -2.707043000 | -2.975854000 | 0.995358000  |
| Si | 2.280998000  | -1.315245000 | 1.828744000  |
| Si | 2.308780000  | 1.791780000  | 1.726208000  |
| Si | -3.224208000 | 2.157762000  | 0.606717000  |
| Si | -2.188938000 | -2.248104000 | -1.909444000 |
| C  | 2.733728000  | 3.183712000  | 0.526247000  |
| H  | 2.757026000  | 4.118275000  | 1.102950000  |
| H  | 3.716996000  | 3.052705000  | 0.061564000  |

|   |              |              |              |
|---|--------------|--------------|--------------|
| H | 1.990305000  | 3.311371000  | -0.269758000 |
| C | 0.664223000  | 2.277611000  | 2.542799000  |
| H | 0.308132000  | 1.545107000  | 3.277854000  |
| H | 0.800943000  | 3.226138000  | 3.078653000  |
| H | -0.126920000 | 2.464317000  | 1.796762000  |
| C | 3.665430000  | 1.768780000  | 3.042527000  |
| H | 3.500818000  | 1.040194000  | 3.843086000  |
| H | 4.646308000  | 1.569653000  | 2.594823000  |
| H | 3.711347000  | 2.761564000  | 3.507542000  |
| C | 4.040032000  | -1.803030000 | 2.312222000  |
| H | 4.560421000  | -1.008832000 | 2.858277000  |
| H | 3.981654000  | -2.677582000 | 2.973076000  |
| H | 4.651653000  | -2.081150000 | 1.447597000  |
| C | 1.317744000  | -1.081784000 | 3.448166000  |
| H | 1.748503000  | -0.313173000 | 4.099195000  |
| H | 0.254683000  | -0.842837000 | 3.307973000  |
| H | 1.344954000  | -2.030271000 | 4.000110000  |
| C | 1.504360000  | -2.793936000 | 0.931454000  |
| H | 1.573099000  | -3.657151000 | 1.608464000  |
| H | 0.443459000  | -2.691865000 | 0.657953000  |
| H | 2.039807000  | -3.043425000 | 0.009819000  |
| C | -1.737596000 | -0.655209000 | -2.863235000 |
| H | -2.299725000 | 0.228436000  | -2.523359000 |
| H | -0.660603000 | -0.428341000 | -2.856675000 |
| H | -2.000549000 | -0.808404000 | -3.917596000 |
| C | -0.994216000 | -3.580290000 | -2.530736000 |
| H | 0.037010000  | -3.283004000 | -2.298819000 |
| H | -1.181670000 | -4.552550000 | -2.060995000 |
| H | -1.073844000 | -3.705771000 | -3.617776000 |
| C | -3.954275000 | -2.712460000 | -2.417281000 |
| H | -4.013199000 | -2.823359000 | -3.507226000 |
| H | -4.280565000 | -3.659656000 | -1.971155000 |
| H | -4.665647000 | -1.933897000 | -2.116735000 |
| C | -2.406277000 | -4.814929000 | 0.635890000  |
| H | -1.332398000 | -5.020117000 | 0.539509000  |
| H | -2.797203000 | -5.430680000 | 1.455722000  |
| H | -2.895404000 | -5.146249000 | -0.288097000 |
| C | -4.576229000 | -2.725886000 | 1.206304000  |
| H | -5.117508000 | -2.969667000 | 0.284980000  |
| H | -4.963877000 | -3.370684000 | 2.005243000  |
| H | -4.815852000 | -1.686883000 | 1.465222000  |
| C | -1.915045000 | -2.660735000 | 2.699154000  |
| H | -2.420344000 | -3.282982000 | 3.448701000  |
| H | -0.854017000 | -2.941639000 | 2.709885000  |
| H | -2.009404000 | -1.621588000 | 3.043860000  |
| C | -3.104723000 | 0.933245000  | 2.071398000  |

|   |              |              |              |
|---|--------------|--------------|--------------|
| H | -2.239239000 | 1.124877000  | 2.724713000  |
| H | -3.996713000 | 1.029267000  | 2.702855000  |
| H | -3.093341000 | -0.113292000 | 1.734530000  |
| C | -4.736644000 | 1.605929000  | -0.387511000 |
| H | -4.583540000 | 0.575056000  | -0.735515000 |
| H | -5.647769000 | 1.624860000  | 0.223390000  |
| H | -4.900460000 | 2.238605000  | -1.267367000 |
| C | -3.534893000 | 3.863154000  | 1.370366000  |
| H | -3.701936000 | 4.637578000  | 0.612653000  |
| H | -4.421875000 | 3.833071000  | 2.015247000  |
| H | -2.678292000 | 4.170388000  | 1.983748000  |
| C | -2.652240000 | 3.868227000  | -2.536263000 |
| H | -3.042196000 | 3.021283000  | -3.114729000 |
| H | -3.487796000 | 4.309723000  | -1.979032000 |
| H | -2.292395000 | 4.623479000  | -3.246058000 |
| C | -0.610148000 | 4.848785000  | -0.484185000 |
| H | -1.430767000 | 5.375925000  | 0.016527000  |
| H | 0.130983000  | 4.589040000  | 0.282530000  |
| H | -0.138857000 | 5.550180000  | -1.184350000 |
| C | 0.140618000  | 2.682869000  | -2.539856000 |
| H | 0.949849000  | 2.149029000  | -2.025119000 |
| H | -0.262428000 | 1.991928000  | -3.291065000 |
| H | 0.586958000  | 3.531678000  | -3.073541000 |
| O | 1.217709000  | -0.308665000 | -1.253209000 |
| C | 2.338731000  | 0.165868000  | -0.631825000 |
| H | 2.528776000  | 1.220942000  | -0.925151000 |
| C | 4.949299000  | -1.409056000 | -3.013475000 |
| C | 3.676508000  | -0.706800000 | -2.556123000 |
| C | 3.610158000  | -0.585893000 | -1.034212000 |
| C | 4.866685000  | 0.106702000  | -0.510457000 |
| C | 6.139682000  | -0.603023000 | -0.957594000 |
| C | 6.196067000  | -0.716379000 | -2.476490000 |
| H | 4.980020000  | -1.463498000 | -4.109316000 |
| H | 4.934670000  | -2.450752000 | -2.652239000 |
| H | 2.782590000  | -1.227807000 | -2.916072000 |
| H | 3.636953000  | 0.309684000  | -2.987489000 |
| H | 3.571808000  | -1.612317000 | -0.625474000 |
| H | 4.837538000  | 0.189077000  | 0.585544000  |
| H | 4.879207000  | 1.139210000  | -0.903051000 |
| H | 7.024206000  | -0.078130000 | -0.573715000 |
| H | 6.165376000  | -1.615441000 | -0.520061000 |
| H | 7.102931000  | -1.249538000 | -2.790203000 |
| H | 6.261695000  | 0.295383000  | -2.908897000 |

**HTMS**

|    |             |              |             |
|----|-------------|--------------|-------------|
| Si | 0.000062000 | -0.000062000 | 0.400181000 |
|----|-------------|--------------|-------------|

|   |              |              |              |
|---|--------------|--------------|--------------|
| C | -1.330875000 | -1.191580000 | -0.231258000 |
| H | -1.342593000 | -1.201649000 | -1.327224000 |
| H | -1.147460000 | -2.215873000 | 0.109856000  |
| H | -2.328615000 | -0.896597000 | 0.110347000  |
| C | -0.366622000 | 1.748306000  | -0.231257000 |
| H | 0.387758000  | 2.464979000  | 0.110064000  |
| H | -0.369922000 | 1.763464000  | -1.327231000 |
| H | -1.345311000 | 2.101515000  | 0.110231000  |
| C | 1.697416000  | -0.556652000 | -0.231363000 |
| H | 2.492591000  | 0.114616000  | 0.109640000  |
| H | 1.941143000  | -1.568085000 | 0.110387000  |
| H | 1.711901000  | -0.561902000 | -1.327327000 |
| H | 0.000120000  | -0.000042000 | 1.881986000  |

**Complex 2 formed with benzaldehyde – dimer - (for comparison with XRD)**

|    |              |              |              |
|----|--------------|--------------|--------------|
| La | -2.070743000 | 0.385814000  | -0.270743000 |
| Si | -2.092222000 | 4.347115000  | -0.117404000 |
| Si | -3.157597000 | 0.913335000  | 3.015400000  |
| Si | -5.450668000 | 0.132800000  | 1.184954000  |
| Si | -3.189741000 | -2.125919000 | -2.566504000 |
| Si | -2.672032000 | 0.564829000  | -3.838986000 |
| O  | 0.436550000  | 1.293609000  | -0.537046000 |
| N  | -1.138499000 | 2.841815000  | -0.193505000 |
| N  | -3.744078000 | 0.467999000  | 1.428905000  |
| N  | -2.729050000 | -0.440045000 | -2.406297000 |
| C  | 0.080741000  | 2.551956000  | -0.537221000 |
| C  | 1.122033000  | 3.509788000  | -0.995920000 |
| C  | 1.964416000  | 3.138531000  | -2.049107000 |
| H  | 1.843191000  | 2.159918000  | -2.512982000 |
| C  | 2.951723000  | 4.006414000  | -2.497793000 |
| H  | 3.597790000  | 3.709548000  | -3.321758000 |
| C  | 3.125904000  | 5.241394000  | -1.878317000 |
| H  | 3.906750000  | 5.916255000  | -2.220424000 |
| C  | 2.308146000  | 5.606163000  | -0.812275000 |
| H  | 2.456119000  | 6.560654000  | -0.312763000 |
| C  | 1.305982000  | 4.746502000  | -0.376482000 |
| H  | 0.687491000  | 5.018546000  | 0.477007000  |
| C  | -1.740608000 | 5.589570000  | -1.495932000 |
| H  | -0.807768000 | 6.141428000  | -1.345955000 |
| H  | -2.563268000 | 6.313474000  | -1.541182000 |
| H  | -1.680654000 | 5.090152000  | -2.470258000 |
| C  | -1.864408000 | 5.128629000  | 1.588371000  |
| H  | -1.736959000 | 4.352284000  | 2.353358000  |
| H  | -2.744092000 | 5.724236000  | 1.860172000  |
| H  | -0.990769000 | 5.789063000  | 1.633058000  |
| C  | -3.864496000 | 3.722605000  | -0.307933000 |



|   |              |              |              |
|---|--------------|--------------|--------------|
| H | -4.042703000 | 3.335567000  | -1.322193000 |
| H | -4.591325000 | 4.526192000  | -0.138579000 |
| H | -4.079882000 | 2.918039000  | 0.411346000  |
| C | -1.257390000 | 1.053059000  | 2.936895000  |
| H | -0.748328000 | 0.100128000  | 2.728108000  |
| H | -0.893440000 | 1.401259000  | 3.912441000  |
| H | -0.912298000 | 1.799783000  | 2.205599000  |
| C | -3.785453000 | 2.597241000  | 3.631811000  |
| H | -3.772691000 | 3.345900000  | 2.829800000  |
| H | -3.151309000 | 2.965714000  | 4.448718000  |
| H | -4.813065000 | 2.534183000  | 4.006908000  |
| C | -3.563761000 | -0.347973000 | 4.375178000  |
| H | -4.642357000 | -0.393055000 | 4.570744000  |
| H | -3.067869000 | -0.069558000 | 5.313679000  |
| H | -3.231852000 | -1.358158000 | 4.104061000  |
| C | -6.605916000 | 1.343798000  | 2.086242000  |
| H | -6.557191000 | 1.236159000  | 3.176706000  |
| H | -7.641507000 | 1.142012000  | 1.783018000  |
| H | -6.380578000 | 2.387677000  | 1.836053000  |
| C | -5.953717000 | -1.590461000 | 1.808431000  |
| H | -5.274823000 | -2.374800000 | 1.455569000  |
| H | -6.970120000 | -1.841843000 | 1.478738000  |
| H | -5.946880000 | -1.609969000 | 2.905917000  |
| C | -5.873834000 | 0.333175000  | -0.659320000 |
| H | -6.001599000 | 1.399665000  | -0.890827000 |
| H | -6.825422000 | -0.165442000 | -0.886642000 |
| H | -5.118402000 | -0.066135000 | -1.350132000 |
| C | -3.961939000 | -2.725859000 | -0.940994000 |
| H | -3.423208000 | -2.423818000 | -0.031258000 |
| H | -3.993106000 | -3.823007000 | -0.922982000 |
| H | -4.991336000 | -2.358304000 | -0.852835000 |
| C | -4.522178000 | -2.455222000 | -3.876510000 |
| H | -5.429739000 | -1.882258000 | -3.647110000 |
| H | -4.787793000 | -3.519989000 | -3.861809000 |
| H | -4.210326000 | -2.205022000 | -4.896736000 |
| C | -1.701561000 | -3.249816000 | -2.930774000 |
| H | -1.222853000 | -2.997236000 | -3.884467000 |
| H | -2.010822000 | -4.303086000 | -2.969207000 |
| H | -0.941990000 | -3.148977000 | -2.142080000 |
| C | -1.834557000 | -0.245917000 | -5.335759000 |
| H | -1.844299000 | 0.447798000  | -6.186004000 |
| H | -2.330946000 | -1.169157000 | -5.656065000 |
| H | -0.788357000 | -0.485022000 | -5.109298000 |
| C | -1.662727000 | 2.136349000  | -3.478684000 |
| H | -2.097571000 | 2.751588000  | -2.680665000 |
| H | -1.639640000 | 2.759267000  | -4.382084000 |

|    |              |              |              |
|----|--------------|--------------|--------------|
| H  | -0.621591000 | 1.911874000  | -3.209297000 |
| C  | -4.391143000 | 1.166524000  | -4.367928000 |
| H  | -4.889369000 | 1.680446000  | -3.535545000 |
| H  | -5.037058000 | 0.336674000  | -4.676443000 |
| H  | -4.317852000 | 1.869172000  | -5.207641000 |
| La | 2.070632000  | -0.385752000 | 0.270583000  |
| Si | 2.091708000  | -4.347080000 | 0.117498000  |
| Si | 3.158210000  | -0.912907000 | -3.015162000 |
| Si | 5.451261000  | -0.134156000 | -1.184102000 |
| Si | 3.190387000  | 2.125447000  | 2.565733000  |
| Si | 2.671582000  | -0.564809000 | 3.839097000  |
| O  | -0.436555000 | -1.293161000 | 0.536986000  |
| N  | 1.138181000  | -2.841675000 | 0.193478000  |
| N  | 3.744654000  | -0.468846000 | -1.428353000 |
| N  | 2.729121000  | 0.439687000  | 2.406145000  |
| C  | -0.081058000 | -2.551606000 | 0.537097000  |
| C  | -1.122565000 | -3.509212000 | 0.995767000  |
| C  | -1.965265000 | -3.137535000 | 2.048564000  |
| H  | -1.844218000 | -2.158729000 | 2.512061000  |
| C  | -2.952701000 | -4.005235000 | 2.497302000  |
| H  | -3.599039000 | -3.708095000 | 3.320936000  |
| C  | -3.126697000 | -5.240460000 | 1.878265000  |
| H  | -3.907626000 | -5.915200000 | 2.220426000  |
| C  | -2.308670000 | -5.605635000 | 0.812567000  |
| H  | -2.456551000 | -6.560291000 | 0.313343000  |
| C  | -1.306389000 | -4.746147000 | 0.376722000  |
| H  | -0.687737000 | -5.018487000 | -0.476537000 |
| C  | 1.739921000  | -5.589533000 | 1.495996000  |
| H  | 0.807231000  | -6.141584000 | 1.345816000  |
| H  | 2.562721000  | -6.313266000 | 1.541506000  |
| H  | 1.679641000  | -5.090077000 | 2.470287000  |
| C  | 1.864205000  | -5.128627000 | -1.588321000 |
| H  | 1.738006000  | -4.352263000 | -2.353484000 |
| H  | 2.743567000  | -5.725066000 | -1.859356000 |
| H  | 0.990044000  | -5.788318000 | -1.633585000 |
| C  | 3.864032000  | -3.722765000 | 0.308182000  |
| H  | 4.041952000  | -3.335239000 | 1.322326000  |
| H  | 4.590834000  | -4.526505000 | 0.139486000  |
| H  | 4.079616000  | -2.918498000 | -0.411343000 |
| C  | 1.257846000  | -1.051286000 | -2.937244000 |
| H  | 0.749591000  | -0.098142000 | -2.727458000 |
| H  | 0.893910000  | -1.397938000 | -3.913345000 |
| H  | 0.911917000  | -1.798592000 | -2.206925000 |
| C  | 3.785125000  | -2.596822000 | -3.632468000 |
| H  | 3.772711000  | -3.345658000 | -2.830614000 |
| H  | 3.150334000  | -2.964927000 | -4.449030000 |

|   |             |              |              |
|---|-------------|--------------|--------------|
| H | 4.812514000 | -2.533954000 | -4.008234000 |
| C | 3.565683000 | 0.349422000  | -4.373654000 |
| H | 4.644229000 | 0.392601000  | -4.569974000 |
| H | 3.068463000 | 0.073689000  | -5.312224000 |
| H | 3.236286000 | 1.359873000  | -4.100416000 |
| C | 6.606182000 | -1.345655000 | -2.085072000 |
| H | 6.557039000 | -1.238544000 | -3.175573000 |
| H | 7.641911000 | -1.143811000 | -1.782366000 |
| H | 6.380856000 | -2.389391000 | -1.834293000 |
| C | 5.954448000 | 1.589070000  | -1.807772000 |
| H | 5.271696000 | 2.372291000  | -1.459840000 |
| H | 6.968423000 | 1.843545000  | -1.473060000 |
| H | 5.953407000 | 1.606787000  | -2.905308000 |
| C | 5.873948000 | -0.334359000 | 0.660326000  |
| H | 6.001937000 | -1.400800000 | 0.891896000  |
| H | 6.825332000 | 0.164529000  | 0.887915000  |
| H | 5.118182000 | 0.064786000  | 1.350865000  |
| C | 3.961777000 | 2.724545000  | 0.939474000  |
| H | 3.422444000 | 2.422229000  | 0.030176000  |
| H | 3.993176000 | 3.821679000  | 0.920863000  |
| H | 4.991043000 | 2.356736000  | 0.850807000  |
| C | 4.523529000 | 2.454547000  | 3.875050000  |
| H | 5.430395000 | 1.880350000  | 3.645995000  |
| H | 4.790305000 | 3.519006000  | 3.859413000  |
| H | 4.211531000 | 2.205523000  | 4.895535000  |
| C | 1.702865000 | 3.250000000  | 2.930584000  |
| H | 1.224740000 | 2.998015000  | 3.884733000  |
| H | 2.012591000 | 4.303153000  | 2.968401000  |
| H | 0.942716000 | 3.149095000  | 2.142460000  |
| C | 1.834330000 | 0.246760000  | 5.335519000  |
| H | 1.843706000 | -0.446652000 | 6.186003000  |
| H | 2.331093000 | 1.169920000  | 5.655494000  |
| H | 0.788249000 | 0.486209000  | 5.108857000  |
| C | 1.661789000 | -2.135985000 | 3.478640000  |
| H | 2.096781000 | -2.751227000 | 2.680689000  |
| H | 1.638209000 | -2.759023000 | 4.381940000  |
| H | 0.620841000 | -1.911167000 | 3.208808000  |
| C | 4.390441000 | -1.166878000 | 4.368313000  |
| H | 4.888013000 | -1.682402000 | 3.536528000  |
| H | 5.036956000 | -0.336917000 | 4.675289000  |
| H | 4.317104000 | -1.868199000 | 5.209121000  |

### 3. References

1. J. A. Seed, M. Gregson, F. Tuna, N. F. Chilton, A. J. Wooles, E. J. McInnes and S. T. Liddle, *Angew. Chem. Int. Ed.*, 2017, **129**, 11692-11696.
2. W. N. G. Moore, J. W. Ziller and W. J. Evans, *Organometallics*, 2021, **40**, 3170-3176.
3. O. V. Dolomanov, L. J. Bourhis, R. J. Gildea, J. A. Howard and H. Puschmann, *J. Appl. Crystallogr.*, 2009, **42**, 339-341.
4. N. Sebbar, M. Ellouz, E. Essassi, Y. Ouzidan and J. Mague, *Acta Crystallogr. E: Crystallogr. Commun.*, 2015, **71**, o999.
5. G. M. Sheldrick, *Acta Crystallogr. C: Struct. Chem.*, 2015, **71**, 3-8.
6. S. H. Yang, J. Huh, J. S. Yang and W. H. Jo, *Macromolecules*, 2004, **37**, 5741-5751.
7. S. H. Yang, J. Huh and W. H. Jo, *Organometallics*, 2006, **25**, 1144-1150.
8. V. A. Rassolov, J. A. Pople, M. A. Ratner and T. L. Windus, *J. Chem. Phys.*, 1998, **109**, 1223-1229.
9. A. V. Marenich, C. J. Cramer and D. G. Truhlar, *J. Phys. Chem. B*, 2009, **113**, 6378-6396.
10. R. B. Gaussian 16, Frisch, M.J.; Trucks, G. W.; Schlegel, H. B.; Scuseria, G. E.; Robb, M. A.; Cheeseman, J. R.; Scalmani, G.; Barone, V.; Petersson, G. A.; Nakatsuji, H.; Li, X.; Caricato, M.; Marenich, A. V.; Bloino, J.; Janesko, B. G.; Gomperts, R.; Mennucci, B.; Hratchian, H. P.; Ortiz, J. V.; Izmaylov, A. F.; Sonnenberg, J. L.; Williams-Young, D.; Ding, F.; Lipparini, F.; Egidi, F.; Goings, J.; Peng, B.; Petrone, A.; Henderson, T.; Ranasinghe, D.; Zakrzewski, V. G.; Gao, J.; Rega, N.; Zheng, G.; Liang, W.; Hada, M.; Ehara, M.; Toyota, K.; Fukuda, R.; Hasegawa, J.; Ishida, M.; Nakajima, T.; Honda, Y.; Kitao, O.; Nakai, H.; Vreven, T.; Throssell, K.; Montgomery Jr., J. A.; Peralta, J. E.; Ogliaro, F.; Bearpark, M. J.; Heyd, J. J.; Brothers, E. N.; Kudin, K. N.; Staroverov, V. N.; Keith, T. A.; Kobayashi, R.; Normand, J.; Raghavachari, K.; Rendell, A. P.; Burant, J. C.; Iyengar, S. S.; Tomasi, J.; Cossi, M.; Millam, J. M.; Klene, M.; Adamo, C.; Cammi, R.; Ochterski, J. W.; Martin, R. L.; Morokuma, K.; Farkas, O.; Foresman, J. B.; Fox, D. J. Gaussian, Inc., Wallingford CT, **2016**.
11. C. J. Barger, R. D. Dicken, V. L. Weidner, A. Motta, T. L. Lohr and T. J. Marks, *J. Am. Chem. Soc.*, 2020, **142**, 8019-8028.
12. A. S. Dudnik, V. L. Weidner, A. Motta, M. Delferro and T. J. Marks, *Nat. Chem.*, 2014, **6**, 1100-1107.
